# Supplementary material for: Electrochemical dehydrogenative and desulfurative annulation for the synthesis of isoxazolines and pyrazolines
Source: Royal Society of Chemistry journal article supplement (doi:10.1039/d5qo00135h), 2025-01-01

## Supporting information

### **Electrochemical Dehydrogenative and Desulfurative Annulation for the Synthesis of Isoxazolines and Pyrazolines**

Qiang Wang,<sup>\*a</sup> Xing Zhang,<sup>a,b</sup> Xianglin Zhuang,<sup>a</sup> Liwen, Xia,<sup>c</sup> Yingwei Wang,<sup>a</sup>  
Xianrong Cai,<sup>a</sup> Xingyong Liang,<sup>\*a</sup> and Lebin Su<sup>\*d</sup>

<sup>a</sup>College of Chemical Engineering, Sichuan University of Science and Engineering,  
Zigong 643002, China.

<sup>b</sup>School of Pharmaceutical and Environmental Engineering, Sichuan Vocational  
College of Chemical Technology, Luzhou 646300, China.

<sup>c</sup>Department of Chemistry, Faculty of Science, National University of Singapore,  
Singapore 117543, Singapore.

<sup>d</sup>School of Pharmaceutical Sciences, Guangzhou Laboratory, Guangzhou Medical  
University, Guangzhou 511436, China.

E-mail: [wangq@suse.edu.cn](mailto:wangq@suse.edu.cn); [levesonk@163.com](mailto:levesonk@163.com); [su\\_lebin@gzlab.ac.cn](mailto:su_lebin@gzlab.ac.cn).

## Table of Contents

|                                                                                                                   |    |
|-------------------------------------------------------------------------------------------------------------------|----|
| <b>General information</b> .....                                                                                  | 2  |
| <b>Graphical guide for the set-up</b> .....                                                                       | 2  |
| <b>Optimization of reaction conditions</b> .....                                                                  | 2  |
| <b>General procedure for electrochemical synthesis of isoxazolines</b> .....                                      | 5  |
| <b>General procedure for electrochemical one-pot synthesis of pyrazolines</b> .....                               | 5  |
| <b>General procedure for electrochemical desulfurative annulation towards the synthesis of isoxazolines</b> ..... | 6  |
| <b>Scalability and synthetic utility</b> .....                                                                    | 6  |
| <b>Mechanism studies</b> .....                                                                                    | 9  |
| <b>Synthesis of substrates</b> .....                                                                              | 12 |
| <b>Characterizations of Products</b> .....                                                                        | 21 |
| <b>References</b> .....                                                                                           | 37 |
| <b>Single Crystal X-ray Diffraction Data</b> .....                                                                | 38 |
| <b>NMR Spectra</b> .....                                                                                          | 40 |

## General information

Unless otherwise noted, all reactions were carried out under atmospheric conditions and all reagents were purchased from commercial suppliers and used without further purification.  $^1\text{H}$ ,  $^{13}\text{C}$  and  $^{19}\text{F}$  NMR spectra were recorded on a Bruker Advance 600 and Bruker Ascend 400 instrument. Multiplicities were reported by use of the following abbreviations: s = singlet, d = doublet, t = triplet, q = quartet, p = pentet, m = multiplet, br = broad. All chemical shifts in  $^1\text{H}$  NMR spectra are reported as  $\delta$  in units of parts per million (ppm) downfield from  $\text{SiMe}_4$  ( $\delta$  0.00) and relative to the signal of solvent (7.26 ppm, chloroform-*d*; 2.50 ppm, DMSO-*d*<sub>6</sub>), in  $^{13}\text{C}$  NMR are relative to d-solvent peaks (77.16 ppm, chloroform-*d*; 39.60 ppm, DMSO-*d*<sub>6</sub>). High-resolution mass spectra (HRMS) were recorded on Waters XEVO G2 Q-TOF.

## Graphical guide for the set-up

As experimental set-up, a graphite electrode (1 cm×1 cm), a carbon paper electrode (13 mm×13 mm×0.2 mm), an undivided three-necked round-bottom flask (10 mL) and a potentiostat (ITECH T66122S) were used.

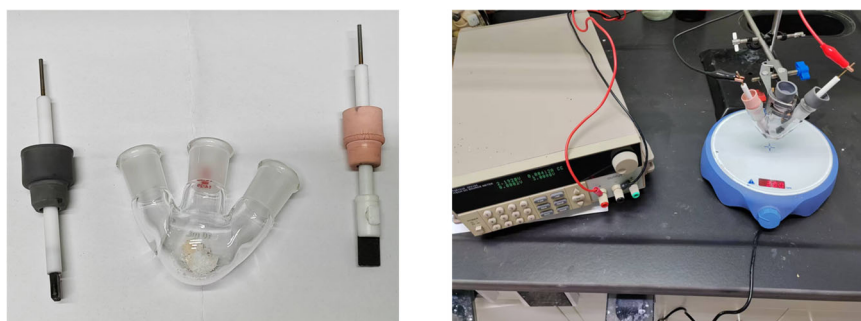

Figure. S1. Reaction setup for the milligram scale reaction

## Optimization of reaction conditions

Table S1. Optimization of the conditions for pyrazolines synthesis <sup>a</sup>

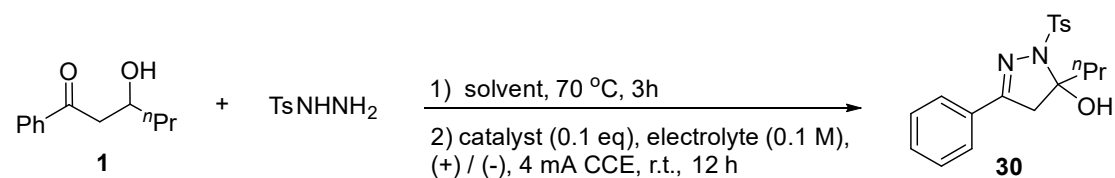

| Entry | Catalyst | Electrolyte         | Anode/cathode | Solvent            | Yield (%) <sup>b</sup> |
|-------|----------|---------------------|---------------|--------------------|------------------------|
| 1     | -        | Bu <sub>4</sub> NBr | Pt/Pt         | CH <sub>3</sub> CN | 12                     |

|                 |              |                                  |                                    |                         |           |
|-----------------|--------------|----------------------------------|------------------------------------|-------------------------|-----------|
| 2               | -            | LiClO <sub>4</sub>               | Pt/Pt                              | CH <sub>3</sub> CN      | N.D.      |
| 3               | TEMPO        | Bu <sub>4</sub> NBr              | Pt/Pt                              | CH <sub>3</sub> CN      | 41        |
| 4               | Cat-A        | Bu <sub>4</sub> NBr              | Pt/Pt                              | CH <sub>3</sub> CN      | 59        |
| 5               | Cat-B        | Bu <sub>4</sub> NBr              | Pt/Pt                              | CH <sub>3</sub> CN      | 55        |
| 6               | Cat-D        | Bu <sub>4</sub> NBr              | Pt/Pt                              | CH <sub>3</sub> CN      | N.D.      |
| 7               | Cat-C        | Bu <sub>4</sub> NBr              | Pt/Pt                              | CH <sub>3</sub> CN      | 32        |
| 8               | Cat-A        | Bu <sub>4</sub> NBr              | Pt/Pt                              | MeOH                    | N.D.      |
| 9               | Cat-A        | Bu <sub>4</sub> NBr              | Pt/Pt                              | TFE                     | N.D.      |
| 10              | Cat-A        | Bu <sub>4</sub> NBr              | Pt/Pt                              | DMF                     | 53        |
| 11              | Cat-A        | Et <sub>4</sub> NBF <sub>4</sub> | Pt/Pt                              | CH <sub>3</sub> CN      | 37        |
| 12              | Cat-A        | Bu <sub>4</sub> NOTs             | Pt/Pt                              | CH <sub>3</sub> CN      | N.D.      |
| 13              | Cat-A        | Bu <sub>4</sub> NBr              | C <sub>g</sub> /Pt                 | CH <sub>3</sub> CN      | 66        |
| 14              | Cat-A        | Bu <sub>4</sub> NBr              | C <sub>g</sub> /Ni                 | CH <sub>3</sub> CN      | 31        |
| 15              | Cat-A        | Bu <sub>4</sub> NBr              | C <sub>g</sub> /Fe                 | CH <sub>3</sub> CN      | 27        |
| 16              | Cat-A        | Bu <sub>4</sub> NBr              | C <sub>g</sub> /C <sub>g</sub>     | CH <sub>3</sub> CN      | 69        |
| 17              | <b>Cat-A</b> | <b>Bu<sub>4</sub>NBr</b>         | <b>C<sub>g</sub>/C<sub>p</sub></b> | <b>CH<sub>3</sub>CN</b> | <b>77</b> |
| 18 <sup>c</sup> | Cat-A        | Bu <sub>4</sub> NBr              | C <sub>g</sub> /C <sub>p</sub>     | CH <sub>3</sub> CN      | 36        |
| 19 <sup>d</sup> | Cat-A        | Bu <sub>4</sub> NBr              | C <sub>g</sub> /C <sub>p</sub>     | CH <sub>3</sub> CN      | 62        |
| 20 <sup>e</sup> | Cat-A        | Bu <sub>4</sub> NBr              | C <sub>g</sub> /C <sub>p</sub>     | CH <sub>3</sub> CN      | N.D.      |

<sup>a</sup>Reaction conditions: **1** (38.5 mg, 0.2 mmol), TsNHNH<sub>2</sub> (40.9 mg, 0.22 mmol), solvent (3 mL), 70 °C, 3h; then cat. (0.02 mmol), electrolyte (0.3 mmol), 4.0 mA and 12 h, undivided cell. <sup>b</sup>Isolated yields. <sup>c</sup>Omission of the step 1 and reacted at 50 °C. <sup>d</sup>Under N<sub>2</sub>. <sup>e</sup>Without electricity. C<sub>g</sub>= graphite, C<sub>p</sub> = carbon paper

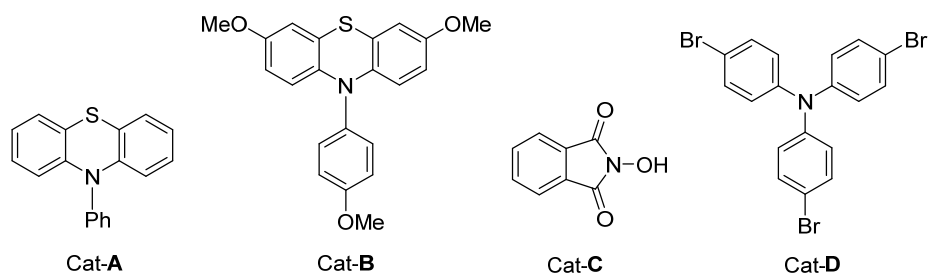

**Table S2.** Optimization of the conditions for desulfurative annulation towards the synthesis of isoxazolines<sup>a</sup>

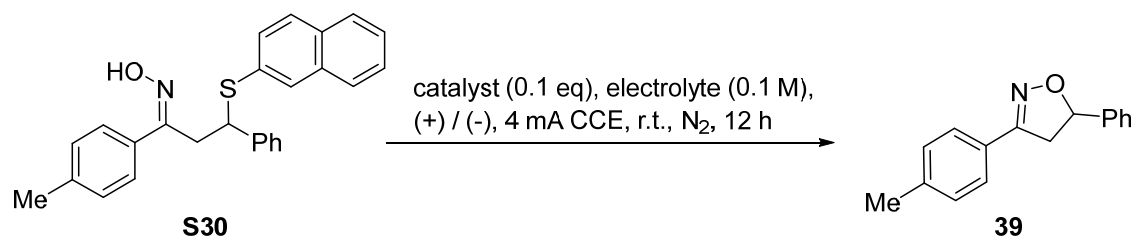

| Entry | Catalyst     | Electrolyte                      | Anode/cathode                      | Solvent                 | Yield (%) <sup>b</sup><br><b>39</b> |
|-------|--------------|----------------------------------|------------------------------------|-------------------------|-------------------------------------|
| 1     | <b>Cat-A</b> | <b>Bu<sub>4</sub>NBr</b>         | <b>C<sub>g</sub>/C<sub>p</sub></b> | <b>CH<sub>3</sub>CN</b> | <b>91</b>                           |
| 2     | Cat-B        | Bu <sub>4</sub> NBr              | C <sub>g</sub> /C <sub>p</sub>     | CH <sub>3</sub> CN      | 82                                  |
| 3     | Cat-C        | Bu <sub>4</sub> NBr              | C <sub>g</sub> /C <sub>p</sub>     | CH <sub>3</sub> CN      | 65                                  |
| 4     | Cat-D        | Bu <sub>4</sub> NBr              | C <sub>g</sub> /C <sub>p</sub>     | CH <sub>3</sub> CN      | 22                                  |
| 5     | TEMPO        | Bu <sub>4</sub> NBr              | C <sub>g</sub> /C <sub>p</sub>     | CH <sub>3</sub> CN      | 37                                  |
| 6     | Cat-A        | LiClO <sub>4</sub>               | C <sub>g</sub> /C <sub>p</sub>     | CH <sub>3</sub> CN      | 13                                  |
| 7     | Cat-A        | Et <sub>4</sub> NCl              | C <sub>g</sub> /C <sub>p</sub>     | CH <sub>3</sub> CN      | 19                                  |
| 8     | Cat-A        | Bu <sub>4</sub> NPF <sub>6</sub> | C <sub>g</sub> /C <sub>p</sub>     | CH <sub>3</sub> CN      | 11                                  |
| 9     | Cat-A        | NaBr                             | C <sub>g</sub> /C <sub>p</sub>     | CH <sub>3</sub> CN      | 16                                  |
| 10    | Cat-A        | Bu <sub>4</sub> NBr              | C <sub>g</sub> /C <sub>p</sub>     | DMF                     | 12                                  |
| 11    | Cat-A        | Bu <sub>4</sub> NBr              | C <sub>g</sub> /C <sub>p</sub>     | DMSO                    | N.D.                                |

|                 |       |                     |                                |                    |      |
|-----------------|-------|---------------------|--------------------------------|--------------------|------|
| 12              | Cat-A | Bu <sub>4</sub> NBr | C <sub>g</sub> /C <sub>p</sub> | MeOH               | 71   |
| 13              | Cat-A | Bu <sub>4</sub> NBr | C <sub>g</sub> /Pt             | CH <sub>3</sub> CN | 66   |
| 14              | Cat-A | Bu <sub>4</sub> NBr | C <sub>g</sub> /Ni             | CH <sub>3</sub> CN | 73   |
| 15              | Cat-A | Bu <sub>4</sub> NBr | C <sub>g</sub> /Cu             | CH <sub>3</sub> CN | 22   |
| 16              | Cat-A | Bu <sub>4</sub> NBr | Pt/Pt                          | CH <sub>3</sub> CN | 37   |
| 17              | Cat-A | Bu <sub>4</sub> NBr | Pt/C <sub>p</sub>              | CH <sub>3</sub> CN | 62   |
| 18 <sup>c</sup> | Cat-A | Bu <sub>4</sub> NBr | C <sub>g</sub> /C <sub>p</sub> | CH <sub>3</sub> CN | 76   |
| 19 <sup>d</sup> | Cat-A | Bu <sub>4</sub> NBr | C <sub>g</sub> /C <sub>p</sub> | CH <sub>3</sub> CN | N.D. |

<sup>a</sup>Reaction conditions: **S39** (72.6 mg, 0.2 mmol), cat. (0.02 mmol), electrolyte (0.3 mmol), solvent (3 mL), 4.0 mA, N<sub>2</sub> and 12 h, undivided cell. <sup>b</sup>Isolated yields. <sup>c</sup>Under air. <sup>d</sup>Without electricity. C<sub>g</sub> = graphite, C<sub>p</sub> = carbon paper

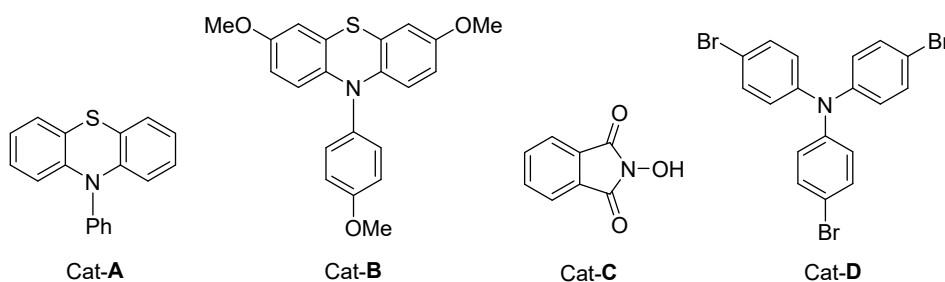

### General procedure for electrochemical synthesis of isoxazolines

An oven-dried undivided electrochemical cell (10 mL) fitted with a stir bar was charged with β-hydroxyl ketone (0.2 mmol), hydroxylamine hydrochloride (15.3 mg, 0.22 mmol), KOAc (21.6 mg, 0.22 mmol), and CH<sub>3</sub>CN (3 mL), the mixture was stirred at 70 °C for 3h; then Cat-A (5.5 mg, 0.02 mmol), <sup>n</sup>Bu<sub>4</sub>NBr (96.7 mg, 0.3 mmol), equipped with a graphite anode (1 cm × 1 cm) and a carbon paper cathode (1 cm × 1.3 cm). The system was electrolyzed with constant current of 4.0 mA at room temperature for 12 h. The reaction mixture was concentrated under reduced pressure, and the residue was purified through silica gel chromatography to afford the desired products.

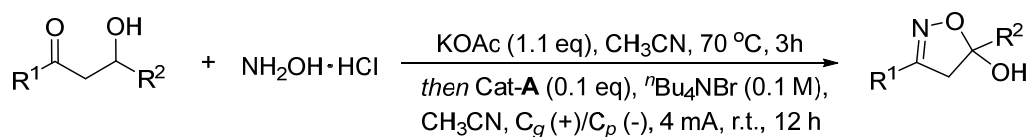

### General procedure for electrochemical one-pot synthesis of pyrazolines

An oven-dried undivided electrochemical cell (10 mL) fitted with a stir bar was

charged with  $\beta$ -hydroxyl ketone (0.2 mmol), sulfonylhydrazine (0.22 mmol) and  $\text{CH}_3\text{CN}$  (3 mL), the mixture was stirred at  $70^\circ\text{C}$  for 3h; then Cat-A (5.5 mg, 0.02 mmol),  ${}^n\text{Bu}_4\text{NBr}$  (96.7 mg, 0.3 mmol), equipped with a graphite anode (1 cm  $\times$  1 cm) and a carbon paper cathode (1 cm  $\times$  1.3 cm). The mixture was electrolyzed with constant current of 4.0 mA at room temperature for 12 h. The reaction mixture was concentrated under reduced pressure, and the residue was purified through silica gel chromatography to afford the desired products.

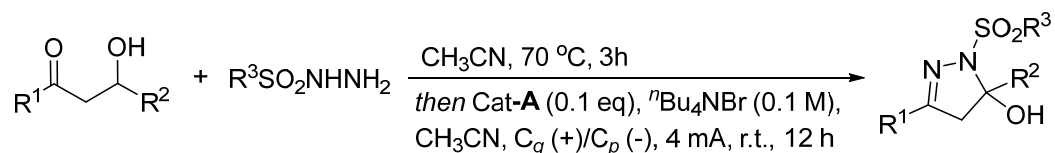

### General procedure for electrochemical desulfurative annulation towards the synthesis of isoxazolines

An oven-dried undivided electrochemical cell (10 mL) fitted with a stir bar was charged with  $\beta$ -arylthio ketone (0.2 mmol), Cat-A (5.5 mg, 0.02 mmol),  ${}^n\text{Bu}_4\text{NBr}$  (96.7 mg, 0.3 mmol), and  $\text{CH}_3\text{CN}$  (3 mL). The system was equipped with a graphite anode (1 cm  $\times$  1 cm) and a carbon paper cathode (1 cm  $\times$  1.3 cm). After purging the reaction system with nitrogen for 5 min to displace the air, the mixture was electrolyzed with constant current of 4.0 mA at room temperature for 12 h. The reaction mixture was concentrated under reduced pressure, and the residue was purified through silica gel chromatography to afford the desired products.

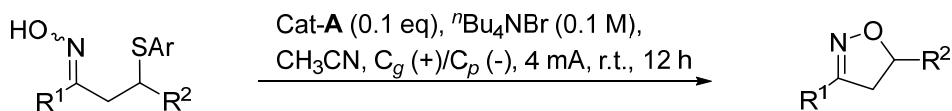

### Scalability and synthetic utility

#### Continuous gram-scale production of 2 with flow cell

To a 250 mL round-bottom flask, 3-hydroxy-1-phenylhexan-1-one **1** (1.92 g, 10 mmol), hydroxylamine hydrochloride (0.75 g, 11 mmol), KOAc (1.08 g, 11 mmol), and  $\text{CH}_3\text{CN}$  (150 mL) were added. The mixture was stirred at  $70^\circ\text{C}$  for 4.5 h; then Cat-A (137.5 mg, 0.5 mmol),  ${}^n\text{Bu}_4\text{NBr}$  (2.42 g, 7.5 mmol) were added. The solution was pushed by a peristaltic pump to pass through the flow electrolytic cell operated with a flow rate of  $0.30\text{ mL min}^{-1}$  and a constant current (50–65 mA). The collected solution was concentrated under reduced pressure on a rotary evaporator. The residue was purified through silica gel chromatography (petroleum: ethyl acetate = 5: 1) to afford the desired products as white solid (1.58 g, 77 %).

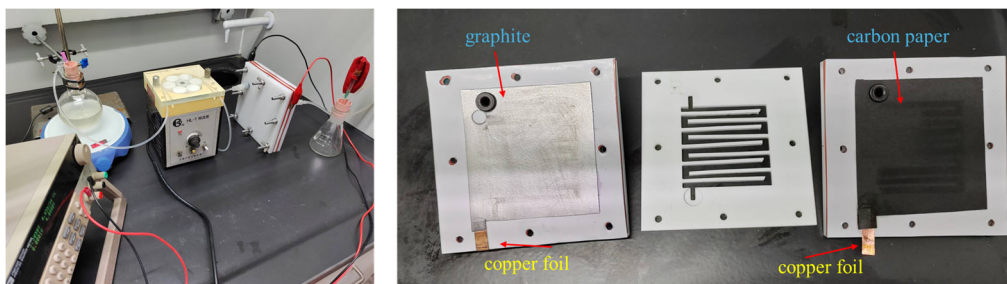

Figure. S2. Reaction setup for the gram scale reaction with flow cell

### Dehydration of **2** to synthesis isoxazole

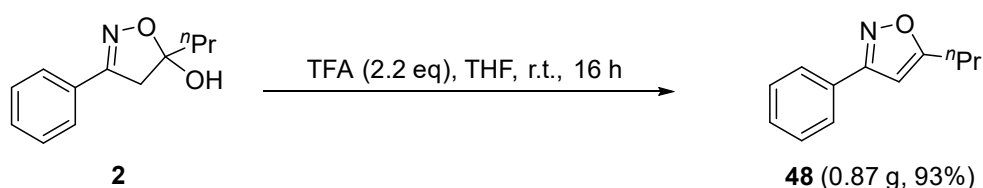

To a 3-phenyl-5-propyl-4,5-dihydroisoxazol-5-ol **2** (1.03 g, 5.0 mol) solution in THF (15 mL) was added TFA (1.25 g, 11.0 mmol) dropwisely at 0 °C. Then the reaction mixture was warmed to room temperature and stirred for 16 h. The solvent was removed under vacuum and the residue was purified by silica gel chromatography (petroleum: ethyl acetate = 20: 1) to provide the desired product as yellow solid (0.87 g, 93 %).

### Gram-scale synthesis of *Parecoxib*

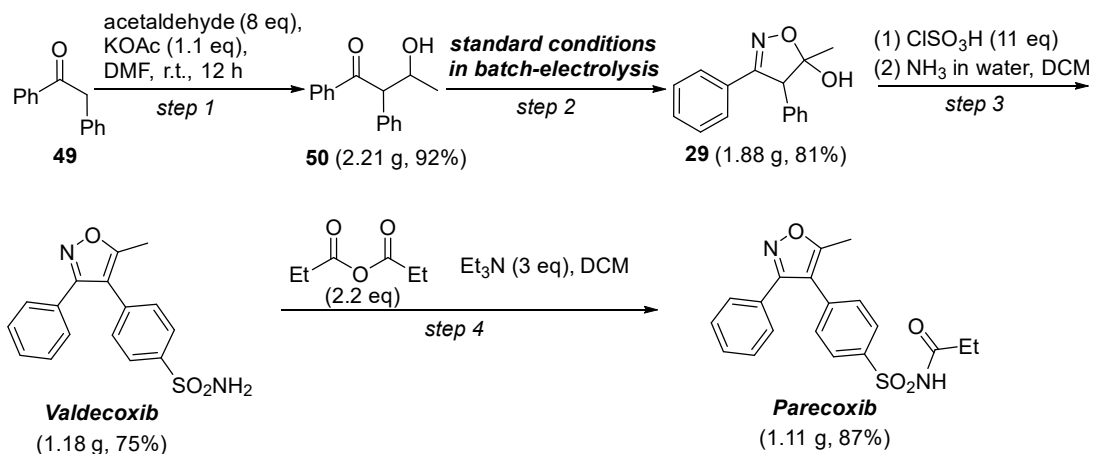

#### Step 1:

To a solution of 1,2-diphenylethan-1-one **49** (10 mmol) and KOAc (1.08 g, 11 mmol) in anhydrous DMF (15 mL) was added acetaldehyde (3.5 g, 80 mmol). The reaction mixture was stirred at room temperature for 12 h. The residue was diluted with water (100 mL) and filtered. The solid was washed with water and dried under vacuum to get the product as white solid (2.21 g, 92 %). <sup>1</sup>H NMR (600 MHz, Chloroform-*d*) δ 7.93 (ddd, *J* = 9.3, 8.4, 1.3 Hz, 2H), 7.48 – 7.41 (m, 1H), 7.38 – 7.30 (m, 3H), 7.30 – 7.25 (m, 3H), 7.24 – 7.17 (m, 1H), 4.56 – 4.52 (m, 1H), 4.52 – 4.49 (m, 0.44H), 4.49 (t,

$J = 2.8$  Hz, 0.56H), 1.20 (d,  $J = 6.2$  Hz, 0.88H), 1.10 (d,  $J = 6.1$  Hz, 2.21H).

### Step 2:

A mixture of 3-hydroxy-1,2-diphenylbutan-1-one **50** (2.1 g, 8.7 mmol), hydroxylamine hydrochloride (0.67 g, 9.6 mmol), and KOAc (1.04 g, 10.6 mmol) in CH<sub>3</sub>CN (130 mL) heated at 70 °C until complete consumption of the **50** (monitored by TLC). The reaction mixture was transferred to a 150 mL beaker which was equipped with a graphite anode and a carbon paper cathode. The mixture was electrolyzed with constant current of 60.0 mA at room temperature for 12 h. The solvent was removed under vacuum and the residue was purified by silica gel chromatography (petroleum: ethyl acetate = 5: 1) to provide the desired product **29**<sup>1</sup> as pale-yellow solid (1.79 g, 81 %).

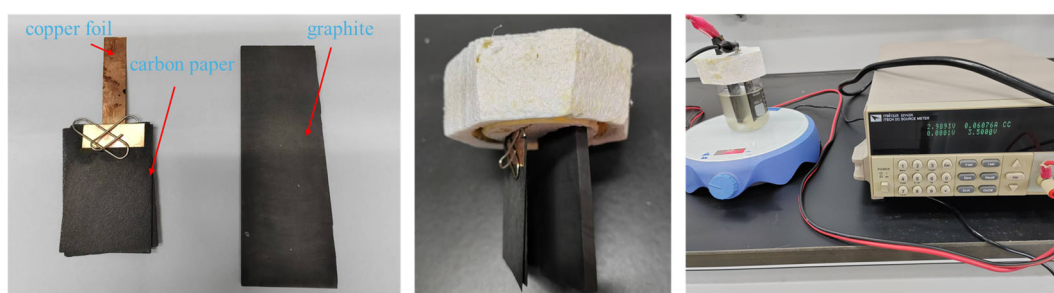

Figure. S3. Reaction setup for the gram scale reaction with batch electrolysis

### Step 3:

A method modified from the reported literature.<sup>2</sup> The mixture of the isoxazoline (1.27 g, 5.0 mmol) in DCM (5 mL) in a round bottom flask equipped with magnetic stirrer was cooled to 0 °C and then chlorosulfonic acid (6.3 g, 55 mmol) was added. The brown reaction mixture was stirred at 0 °C for 4 h and then dropwise added to a stirring suspension of ice (60mL) and dichloromethane (30 mL). The organic phase was added directly to a solution of ammonium hydroxide (28% NH<sub>3</sub> in water, 50 mL) kept at 0 °C. This biphasic mixture was vigorously stirred at 0 °C for 5 h. The two phases were separated, and the aqueous layer was extracted three times with CH<sub>2</sub>Cl<sub>2</sub>. The combined organic extracts were dried over anhydrous Na<sub>2</sub>SO<sub>4</sub> and then evaporated under vacuum. The solvent was removed under vacuum and the residue was purified by silica gel chromatography (petroleum: ethyl acetate = 3: 1) to provide the desired product as white solid (1.18 g, 75 %).

### Step 4:

A solution of *Valdecoxib* (1.09 g, 3.5 mmol) and Et<sub>3</sub>N (1.06 g, 10.5 mmol) in CH<sub>2</sub>Cl<sub>2</sub> (20 mL) was added propionic anhydride (1.0 g, 7.7 mmol) dropwise over 20 min at 0 °C. The reaction mixture was stirred at room temperature for 10 h, and the resulting mixture was washed with water and brine, the organic phase was dried over anhydrous Na<sub>2</sub>SO<sub>4</sub> and concentrated under reduced pressure. The residue was purified by silica gel chromatography (petroleum: DCM = 4: 5) to provide the desired product as white solid (1.13 g, 87 %).



## Mechanism studies

### Quenching experiment

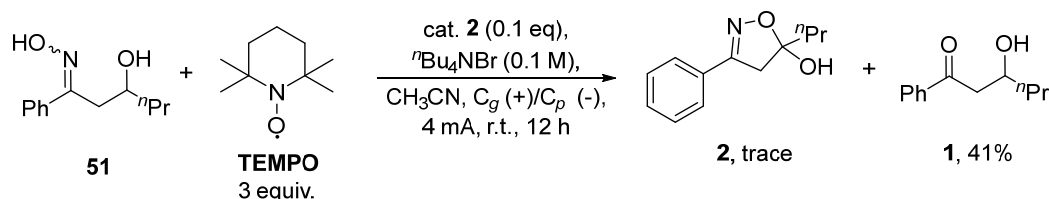

An oven-dried undivided electrochemical cell (10 mL) fitted with a stir bar was charged with β-hydroxyl oxime **51** (41.4 mg, 0.2 mmol), Cat-A (5.5 mg, 0.02 mmol),  $n\text{Bu}_4\text{NBr}$  (96.7 mg, 0.3 mmol), TEMPO (93.8 mg, 0.6 mmol) and  $\text{CH}_3\text{CN}$  (3 mL). The system was equipped with a graphite anode (1 cm x 1 cm) and a carbon paper cathode (1 cm x 1.3 cm). The mixture was electrolyzed with constant current of 4.0 mA at room temperature for 12 h. None of the product **2** was detected while β-hydroxyl ketone **1** was isolated in 41% yield.

### Experimental Evidence for the oxime radical

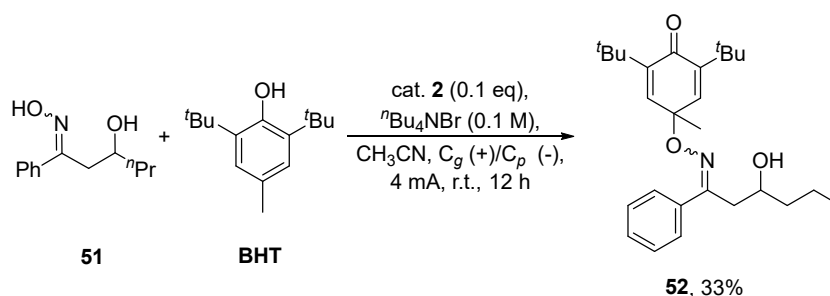

An oven-dried undivided electrochemical cell (10 mL) fitted with a stir bar was charged with β-hydroxyl oxime **51** (41.4 mg, 0.2 mmol), Cat-A (5.5 mg, 0.02 mmol),  $n\text{Bu}_4\text{NBr}$  (96.7 mg, 0.3 mmol), BHT (132.1 mg, 0.6 mmol) and  $\text{CH}_3\text{CN}$  (3 mL). The system was equipped with a graphite anode (1 cm x 1 cm) and a carbon paper cathode (1 cm x 1.3 cm). After purging the reaction system with nitrogen for 5 min to displace the air, the mixture was electrolyzed with constant current of 4.0 mA at room temperature for 12 h. The reaction mixture was concentrated under reduced pressure, and the residue was purified through silica gel chromatography to afford the **52**.

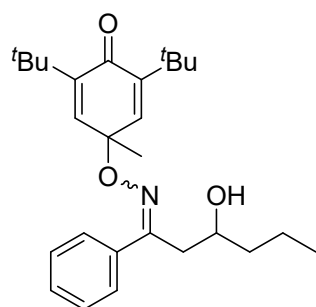

**2,6-di-tert-butyl-4-(((3-hydroxy-1-phenylhexylidene)amino)oxy)-4-**

### methylcyclohexa-2,5-dien-1-one (52):

White solid (28.0 mg, 33% yield).  $^1\text{H NMR}$  (600 MHz, Chloroform-*d*)  $\delta$  7.52 (d,  $J$  = 7.5 Hz, 2H), 7.44 – 7.37 (m, 3H), 6.59 (s, 2H), 3.88 (tt,  $J$  = 7.9, 3.2 Hz, 1H), 3.24 (s, 1H), 2.65 – 2.49 (m, 2H), 1.57 – 1.51 (m, 1H), 1.47 – 1.41 (m, 1H), 1.36 (s, 3H), 1.36 – 1.30 (m, 2H), 1.25 (d,  $J$  = 7.9 Hz, 18H), 0.88 (t,  $J$  = 7.2 Hz, 3H).  $^{13}\text{C NMR}$  (151 MHz, Chloroform-*d*)  $\delta$  186.98, 156.23, 146.68, 146.64, 142.16, 142.08, 135.91, 129.30, 128.47, 126.42, 69.97, 40.07, 34.73, 34.62, 29.54, 25.43, 18.87, 14.10. HRMS (ESI)  $m/z$ :  $[\text{M} + \text{Na}]^+$  calcd. for  $\text{C}_{27}\text{H}_{39}\text{NNaO}_3$  448.2822; Found 448.2812.

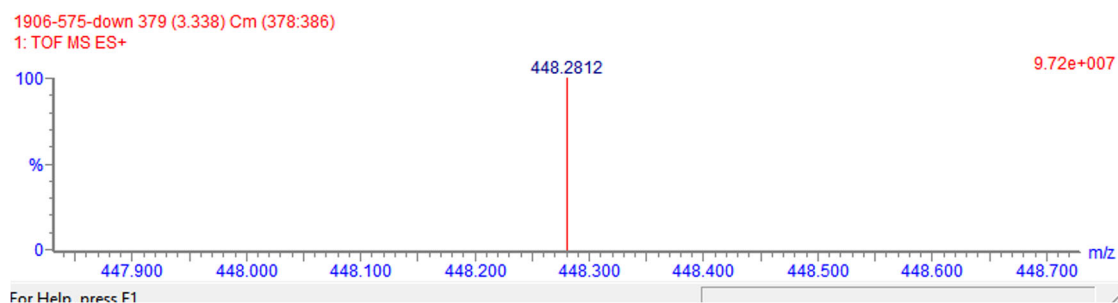

### Electrooxidation of $\beta$ -methoxyl oxime

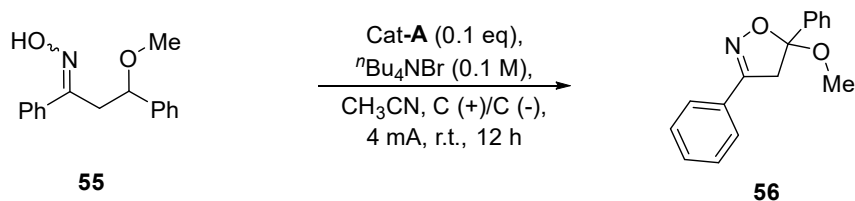

An oven-dried undivided electrochemical cell (10 mL) fitted with a stir bar was charged with  $\beta$ -methoxyl oxime **55** (44.2 mg, 0.2 mmol), Cat-A (5.5 mg, 0.02 mmol),  $n\text{Bu}_4\text{NBr}$  (96.7 mg, 0.3 mmol), and  $\text{CH}_3\text{CN}$  (3 mL). The system was equipped with a graphite anode (1 cm x 1 cm) and a carbon paper cathode (1 cm x 1.3 cm). The mixture was electrolyzed with constant current of 4.0 mA at room temperature for 12 h. The reaction mixture was concentrated under reduced pressure, and the residue was purified through silica gel chromatography (petroleum: ethyl acetate = 8: 1) to afford the desired products.

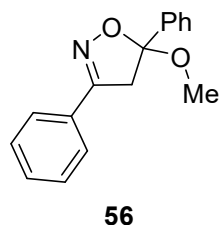

### 5-methoxy-5-methyl-3-phenyl-4,5-dihydroisoxazole (56):

White solid (44.5 mg, 88% yield).  $^1\text{H NMR}$  (600 MHz, Chloroform-*d*)  $\delta$  7.64 – 7.58 (m, 2H), 7.55 – 7.49 (m, 2H), 7.37 – 7.27 (m, 6H), 3.58 (d,  $J$  = 17.4 Hz, 1H), 3.32 (d,  $J$

= 17.3 Hz, 1H), 3.18 (s, 3H). <sup>13</sup>C NMR (151 MHz, Chloroform-*d*) δ 158.2, 138.3, 130.4, 129.3, 128.8, 128.7, 128.6, 126.7, 126.4, 110.5, 50.83 48.9. HRMS (ESI) *m/z*: [M + H]<sup>+</sup> calcd. for C<sub>16</sub>H<sub>16</sub>NO<sub>2</sub> 254.1176; Found 254.1179.

### Exclusion of A Route to the Isoxazolines via Annulation of Ketone and Oxime

#### Electrooxidation of β-hydroxyl oxime ether

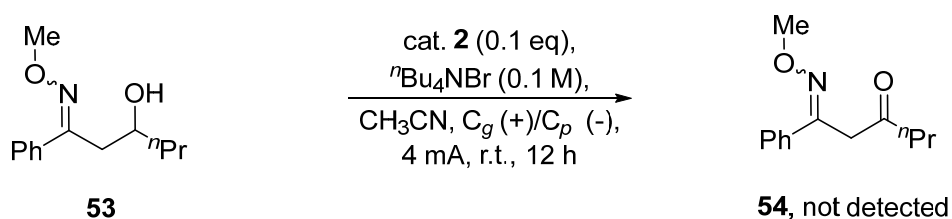

Oxime ether **54** (44.2 mg, 0.2 mmol), cat-A (5.5 mg, 0.02 mmol), <sup>n</sup>Bu<sub>4</sub>NBr (96.7 mg, 0.3 mmol), and CH<sub>3</sub>CN (3 mL) were added to oven-dried undivided electrochemical cell (10 mL) which equipped with a graphite anode (1 cm x 1 cm) and a carbon paper cathode (1 cm x 1.3 cm). The mixture was electrolyzed with constant current of 4.0 mA at room temperature for 12 h. Conversion of **53** was traceless and none of the ketone product **54** was detected.

#### Electrooxidation of β-hydroxyl ketone

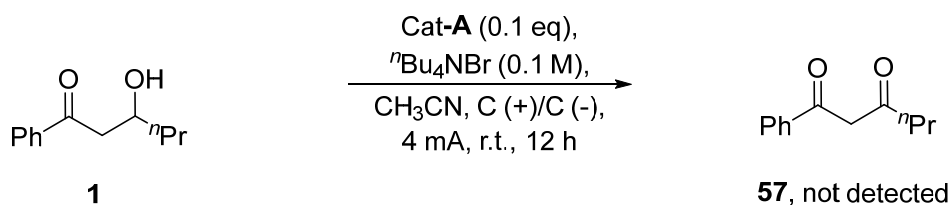

β-Hydroxyl ketone **1** (38.5 mg, 0.2 mmol), cat-A (5.5 mg, 0.02 mmol), <sup>n</sup>Bu<sub>4</sub>NBr (96.7 mg, 0.3 mmol), and CH<sub>3</sub>CN (3 mL) were added to oven-dried undivided electrochemical cell (10 mL) which equipped with a graphite anode (1 cm x 1 cm) and a carbon paper cathode (1 cm x 1.3 cm). The mixture was electrolyzed with constant current of 4.0 mA at room temperature for 12 h. Conversion of **1** was traceless and none of the ketone product **57** was detected.

#### Electrooxidation of β-hydroxyl ketone

Cyclic voltammograms were recorded in a solution of acetonitrile (MeCN) containing 0.1 M tetrabutylammonium tetrafluoroborate (<sup>n</sup>Bu<sub>4</sub>NBF<sub>4</sub>) as the supporting electrolyte. The glassy carbon disk electrode (diameter, 1 mm) were used as both the working and counter electrode, while an Ag/AgCl electrode served as the reference electrode. The scan rate was maintained at 100 mV/s.

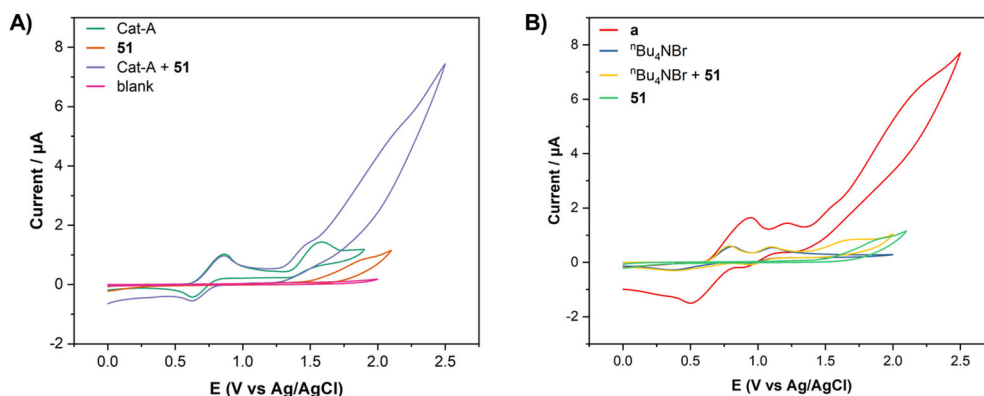

Figure. S4. Cyclic voltammograms. A) cyclic voltammograms of Cat-A (3 mM) in the absence or presence of **51** (3 mM). B) cyclic voltammograms of  $n\text{Bu}_4\text{NBr}$  (3 mM) in the absence or presence of **51** (3 mM). a:  $n\text{Bu}_4\text{NBr}$  (3 mM) + Cat-A (3 mM) + **51** (5 mM).

## Synthesis of substrates

### Synthesis of $\beta$ -hydroxyl oxime **51**

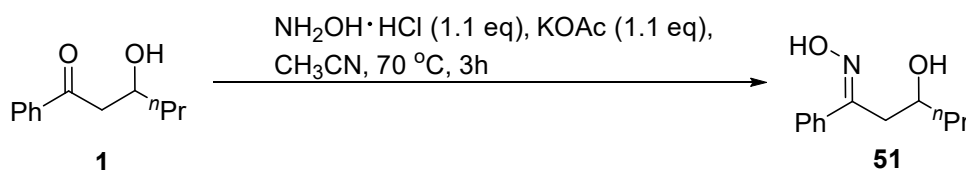

$\beta$ -Hydroxyl ketone **1** (0.96 g, 5 mmol), hydroxylamine hydrochloride (0.42 g, 6 mmol), and KOAc (0.59 g, 6 mmol) in  $\text{CH}_3\text{CN}$  (15 mL) heated at 70 °C until complete consumption of the **1** (monitored by TLC). The solvent was removed under vacuum and the residue was purified by silica gel chromatography (petroleum: ethyl acetate = 3: 1) to provide the desired product as white solid (0.94 g, 91 %).  $^1\text{H}$  NMR (600 MHz, Chloroform-*d*)  $\delta$  7.60 (dd,  $J = 6.2, 2.7$  Hz, 2H), 7.39 – 7.33 (m, 3H), 4.05 – 3.96 (m, 1H), 3.09 (dd,  $J = 13.5, 8.8$  Hz, 1H), 2.92 (dd,  $J = 13.6, 3.9$  Hz, 1H), 1.54 – 1.45 (m, 3H), 1.38 – 1.31 (m, 1H), 0.89 (t,  $J = 6.9$  Hz, 3H).

### Synthesis of 3-methoxy-1,3-diphenylpropan-1-one oxime **55**

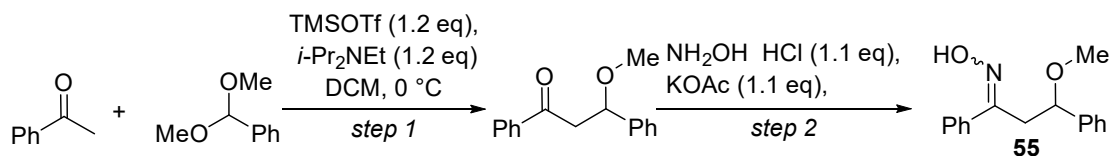

#### Step 1:

Following a modified literature procedure,<sup>3</sup> To an oven-dried 100 mL round-bottomed flask under  $\text{N}_2$  was added  $\text{CH}_2\text{Cl}_2$  (25 mL). The flask was cooled to 0 °C, and acetophenone (1.20 g, 10.0 mmol), *i*- $\text{Pr}_2\text{NEt}$  (1.29 g, 12.0 mmol), and TMSOTf (2.67 g, 12.0 mmol) were added sequentially. After 30 min, benzaldehyde dimethyl acetal

(2.13 g, 14.0 mmol) was added, and the reaction was removed from the ice bath and allowed to warm to room temperature. After 2 h, the reaction mixture was filtered through a plug of silica and washed with Et<sub>2</sub>O, then the solvent was removed by rotary evaporation. The residue was purified by silica gel chromatography (petroleum: ethyl acetate = 15: 1) to provide the desired product as colorless oil (2.09 g, 87 %). <sup>1</sup>H NMR (600 MHz, Chloroform-*d*) δ 7.94 (dt, *J* = 8.5, 1.0 Hz, 2H), 7.54 (ddq, *J* = 7.8, 6.9, 1.1 Hz, 1H), 7.46 – 7.42 (m, 2H), 7.41 (d, *J* = 7.3 Hz, 2H), 7.39 – 7.35 (m, 1H), 7.33 – 7.27 (m, 1H), 4.88 (dd, *J* = 8.4, 4.4 Hz, 1H), 3.59 (ddd, *J* = 16.5, 8.4, 0.8 Hz, 1H), 3.24 (d, *J* = 0.9 Hz, 3H), 3.08 (ddd, *J* = 16.5, 4.4, 0.8 Hz, 1H).

### Step 2:

To a 100 mL round-bottom flask, 3-methoxy-1,3-diphenylpropan-1-one (1.20 g, 5.0 mmol), hydroxylamine hydrochloride (0.42 g, 6.0 mmol), KOAc (0.59 g, 6 mmol), and CH<sub>3</sub>CN (15 mL) were added. The mixture was stirred at 70 °C for 5 h. The solvent was removed by rotary evaporation. The residue was purified by silica gel chromatography (petroleum: ethyl acetate = 10: 1) to provide the desired product as white solid (1.16 g, 91 %). <sup>1</sup>H NMR (600 MHz, Chloroform-*d*) δ 8.82 (s, 1H), 7.58 (dq, *J* = 5.2, 1.5 Hz, 2H), 7.44 – 7.31 (m, 7H), 7.28 – 7.26 (m, 1H), 4.66 (dd, *J* = 8.8, 5.1 Hz, 1H), 3.28 (ddd, *J* = 13.7, 8.7, 1.4 Hz, 1H), 3.18 (s, 3H), 3.15 – 2.98 (m, 1H).

### Synthesis of 3-hydroxy-1-phenylhexan-1-one O-methyl oxime 53

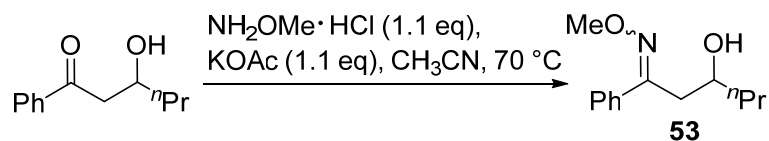

To a 100 mL round-bottom flask, 3-hydroxy-1-phenylhexan-1-one (0.96 g, 5.0 mmol), methoxyamine hydrochloride (0.50 g, 6.0 mmol), KOAc (0.59 g, 6 mmol), and CH<sub>3</sub>CN (15 mL) were added. The mixture was stirred at 70 °C for 5 h. The solvent was removed by rotary evaporation. The residue was purified by silica gel chromatography (petroleum: ethyl acetate = 15: 1) to provide the desired product as white solid (0.92 g, 83 %). <sup>1</sup>H NMR (600 MHz, Chloroform-*d*) δ 7.59 – 7.54 (m, 2H), 7.28 – 7.22 (m, 3H), 3.88 (s, 3H), 3.83 (s, 1H), 2.89 (dd, *J* = 13.4, 8.6 Hz, 1H), 2.78 (dd, *J* = 13.5, 4.1 Hz, 1H), 1.42 – 1.33 (m, 2H), 1.29 – 1.14 (m, 2H), 0.80 (t, *J* = 6.6 Hz, 3H).

### Synthesis of β-Hydroxyl ketone

#### General Procedure A:

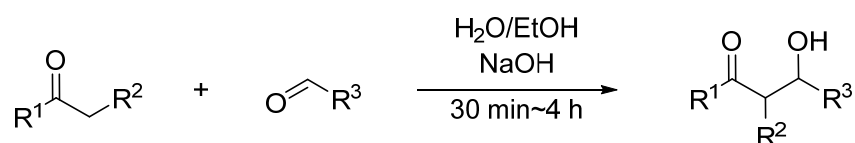

β-Hydroxyl ketone was synthesized following a literature procedure.<sup>4</sup> To a solution of NaOH (0.44 g, 11 mmol) in water (5 mL) and EtOH (10 mL), ketone (10 mmol) and aldehyde (13 mmol) were sequentially added at 0 °C. After stirring for 30

min~4 h (monitored by TLC), a saturated aqueous solution of NH<sub>4</sub>Cl (15 mL) was added, and the solution was extracted with EtOAc. (3 × 15 mL). The organic phase was dried over anhydrous Na<sub>2</sub>SO<sub>4</sub> and concentrated under reduced pressure. The residue was purified by silica gel chromatography to provide the desired product.

#### General Procedure B:

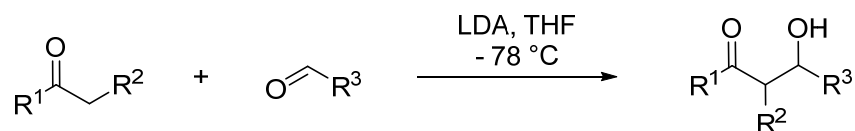

$\beta$ -Hydroxyl ketone was synthesized following a modified literature procedure.<sup>5</sup> LDA (2.0M in THF) (1.1 equiv.) was dissolved in dry THF and cooled to  $-78$  °C under N<sub>2</sub>. The ketone (1.0 equiv.) was added dropwise to the LDA solution. The reaction mixture was stirred at  $-78$  °C for 2 h. Then aldehyde (1.1 equiv.) was added dropwise. The reaction mixture was then allowed to stir 2h at  $-78$  °C under N<sub>2</sub>. Then a saturated aqueous solution of NH<sub>4</sub>Cl (35 mL) was added. The reaction was allowed to stir for 10 minutes at 0 °C. The reaction mixture was extracted with ethyl acetate (3 × 50 mL) and then washed with sodium bicarbonate, brine, and water. The organic layer was dried over MgSO<sub>4</sub> and concentrated under reduced pressure. The residue was purified by silica gel chromatography to provide the desired product.

#### Characterizations of substrates

**3-hydroxy-1-phenylhexan-1-one (1):** obtained from General Procedure B as white solid (93%). <sup>1</sup>H NMR (600 MHz, Chloroform-*d*)  $\delta$  7.97 – 7.93 (m, 2H), 7.58 (tt,  $J = 7.3, 1.2$  Hz, 1H), 7.49 – 7.44 (m, 2H), 4.24 (dddd,  $J = 9.1, 7.4, 4.6, 2.6$  Hz, 1H), 3.43 (br, 1H), 3.16 (ddd,  $J = 17.5, 2.7, 1.0$  Hz, 1H), 3.05 (dd,  $J = 17.6, 9.1$  Hz, 1H), 1.67 – 1.56 (m, 1H), 1.56 – 1.39 (m, 3H), 0.96 (t,  $J = 7.1$  Hz, 3H).

**3-hydroxy-1-(*p*-tolyl)hexan-1-one (S3):** obtained from General Procedure B as white solid (91%). <sup>1</sup>H NMR (600 MHz, Chloroform-*d*)  $\delta$  7.88 – 7.82 (m, 2H), 7.31 – 7.23 (m, 2H), 4.08 (q,  $J = 4.6$  Hz, 1H), 3.48 – 3.34 (m, 1H), 3.17 – 2.95 (m, 1H), 2.41 (s, 3H), 1.77 – 1.15 (m, 4H), 0.87 (t,  $J = 7.1$  Hz, 3H).

**3-hydroxy-1-(4-pentylphenyl)hexan-1-one (S4):** obtained from General Procedure A as white solid (59%). <sup>1</sup>H NMR (600 MHz, Chloroform-*d*)  $\delta$  7.83 – 7.76 (m, 2H), 7.26 – 7.13 (m, 2H), 4.20 – 4.11 (m, 1H), 3.28 (s, 1H), 3.07 (dd,  $J = 17.5, 2.6$  Hz, 1H), 2.93 (dd,  $J = 17.5, 9.1$  Hz, 1H), 2.66 – 2.51 (m, 2H), 1.62 – 1.51 (m, 3H), 1.48 – 1.33 (m, 3H), 1.31 – 1.19 (m, 4H), 0.88 (t,  $J = 7.1$  Hz, 3H), 0.81 (t,  $J = 7.0$  Hz, 3H).

**3-hydroxy-1-(4-methoxyphenyl)hexan-1-one (S5):** obtained from General Procedure A as white solid (52%). <sup>1</sup>H NMR (600 MHz, Chloroform-*d*)  $\delta$  8.06 – 7.84 (m, 2H), 7.20 – 6.42 (m, 2H), 4.09 (dtd,  $J = 15.7, 8.2, 2.9$  Hz, 1H), 3.89 – 3.85 (m, 3H), 3.59 – 3.51 (m, 1H), 3.42 (d,  $J = 7.3$  Hz, 1H), 1.55 – 1.48 (m, 1H), 1.38 – 1.26 (m, 3H), 0.88 (t,  $J = 7.1$  Hz, 3H).

**1-(4-fluorophenyl)-3-hydroxyhexan-1-one (S6):** obtained from General Procedure A

as white solid (39%). <sup>1</sup>H NMR (600 MHz, Chloroform-*d*) δ 8.04 – 7.97 (m, 2H), 7.19 – 7.11 (m, 2H), 4.23 (dddd, *J* = 9.0, 7.6, 4.6, 2.7 Hz, 1H), 3.12 (dd, *J* = 17.5, 2.7 Hz, 1H), 3.03 (dd, *J* = 17.5, 9.0 Hz, 1H), 1.62 – 1.58 (m, 1H), 1.53 – 1.49 (m, 2H), 1.46 – 1.41 (m, 1H), 0.96 (t, *J* = 7.1 Hz, 3H).

**1-(4-chlorophenyl)-3-hydroxyhexan-1-one (S7):** obtained from General Procedure A as white solid (41%). <sup>1</sup>H NMR (600 MHz, Chloroform-*d*) δ 7.82 – 7.77 (m, 2H), 7.36 – 7.32 (m, 2H), 4.13 (dt, *J* = 8.6, 4.5 Hz, 1H), 3.18 (s, 1H), 3.04 – 2.88 (m, 2H), 1.58 – 1.48 (m, 1H), 1.45 – 1.30 (m, 3H), 0.86 (t, *J* = 7.2 Hz, 3H).

**1-(4-bromophenyl)-3-hydroxyhexan-1-one (S8):** obtained from General Procedure A as pale-yellow solid (63%). <sup>1</sup>H NMR (600 MHz, Chloroform-*d*) δ 7.83 – 7.77 (m, 2H), 7.63 – 7.57 (m, 2H), 4.22 (dddd, *J* = 8.7, 7.6, 4.5, 3.0 Hz, 1H), 3.27 (d, *J* = 25.3 Hz, 1H), 3.12 – 2.99 (m, 2H), 1.65 – 1.56 (m, 1H), 1.56 – 1.35 (m, 3H), 0.95 (t, *J* = 7.2 Hz, 3H).

**3-hydroxy-1-(4-(trifluoromethyl)phenyl)hexan-1-one (S9):** obtained from General Procedure A as grey solid (57%). <sup>1</sup>H NMR (600 MHz, Chloroform-*d*) δ 8.06 (dt, *J* = 7.9, 0.8 Hz, 2H), 7.74 (d, *J* = 8.1 Hz, 2H), 4.36 – 4.22 (m, 1H), 3.15 – 3.09 (m, 2H), 1.66 – 1.58 (m, 1H), 1.55 – 1.50 (m, 2H), 1.48 – 1.42 (m, 1H), 0.97 (t, *J* = 7.2 Hz, 3H).

**3-hydroxy-1-(3-methoxyphenyl)hexan-1-one (S10):** obtained from General Procedure A as white solid (61%). <sup>1</sup>H NMR (600 MHz, Chloroform-*d*) δ 7.49 (ddd, *J* = 7.6, 1.6, 0.9 Hz, 1H), 7.43 (dd, *J* = 2.7, 1.5 Hz, 1H), 7.27 (t, *J* = 7.9 Hz, 1H), 7.00 (ddd, *J* = 8.3, 2.7, 0.9 Hz, 1H), 3.76 (s, 3H), 3.00 (dd, *J* = 16.3, 6.9 Hz, 1H), 2.89 (dd, *J* = 16.3, 6.3 Hz, 1H), 2.67 (p, *J* = 6.5 Hz, 1H), 1.34 (ddd, *J* = 9.1, 6.7, 4.5 Hz, 2H), 1.32 – 1.24 (m, 2H), 0.80 (t, *J* = 7.1 Hz, 3H).

**3-hydroxy-1-(2-methoxyphenyl)hexan-1-one (S11):** obtained from General Procedure A as yellow oil (63%). <sup>1</sup>H NMR (600 MHz, Chloroform-*d*) δ 7.64 (dd, *J* = 7.7, 1.8 Hz, 1H), 7.40 (ddd, *J* = 8.4, 7.3, 1.8 Hz, 1H), 6.92 (td, *J* = 7.5, 1.0 Hz, 1H), 6.89 (dd, *J* = 8.4, 1.0 Hz, 1H), 4.13 – 4.02 (m, 1H), 3.82 (s, 3H), 3.25 (s, 1H), 3.16 (dd, *J* = 17.9, 2.4 Hz, 1H), 2.94 (dd, *J* = 17.9, 9.3 Hz, 1H), 1.55 – 1.46 (m, 1H), 1.44 – 1.30 (m, 3H), 0.87 (t, *J* = 7.2 Hz, 3H).

**1-(2-bromophenyl)-3-hydroxyhexan-1-one (S12):** obtained from General Procedure A as yellow solid (39%). <sup>1</sup>H NMR (600 MHz, Chloroform-*d*) δ 7.60 (dd, *J* = 8.0, 1.2 Hz, 1H), 7.43 (dd, *J* = 7.6, 1.7 Hz, 1H), 7.37 (td, *J* = 7.5, 1.1 Hz, 1H), 7.31 – 7.28 (m, 1H), 4.24 – 4.19 (m, 1H), 3.19 – 3.08 (m, 2H), 3.00 (dd, *J* = 17.4, 8.9 Hz, 1H), 1.61 – 1.52 (m, 1H), 1.50 – 1.44 (m, 2H), 1.43 – 1.34 (m, 1H), 0.94 (t, *J* = 7.1 Hz, 3H).

**1-(2-fluorophenyl)-3-hydroxyhexan-1-one (S13):** obtained from General Procedure A as white solid (43%). <sup>1</sup>H NMR (600 MHz, Chloroform-*d*) δ 7.88 (td, *J* = 7.6, 1.9 Hz, 1H), 7.54 (dddd, *J* = 8.3, 7.1, 5.0, 1.9 Hz, 1H), 7.26 – 7.22 (m, 1H), 7.14 (ddd, *J* = 11.3, 8.3, 1.1 Hz, 1H), 4.28 – 4.18 (m, 1H), 3.21-3.17 (m, 2H), 3.06 (ddd, *J* = 18.2, 9.2, 3.4 Hz, 1H), 1.60 (dddd, *J* = 13.2, 11.3, 7.0, 3.1 Hz, 2H), 1.45 – 1.39 (m, 2H), 0.95 (t, *J* = 7.2 Hz, 3H).

**3-hydroxy-1-(naphthalen-2-yl)hexan-1-one (S14):** obtained from General Procedure A as white solid (55%). <sup>1</sup>H NMR (600 MHz, Chloroform-*d*) δ 8.42 (d, *J* = 1.7 Hz, 1H), 7.98 (dd, *J* = 8.6, 1.7 Hz, 1H), 7.92 (dd, *J* = 8.2, 1.2 Hz, 1H), 7.88 – 7.78 (m, 2H), 7.57 (ddd, *J* = 8.2, 6.8, 1.3 Hz, 1H), 7.52 (ddd, *J* = 8.1, 6.8, 1.3 Hz, 1H), 4.28 (qd, *J* = 7.6, 2.8 Hz, 1H), 3.42 (s, 1H), 3.24 (dd, *J* = 17.3, 2.8 Hz, 1H), 3.15 (dd, *J* = 17.3, 8.9 Hz, 1H), 1.71 – 1.60 (m, 1H), 1.59 – 1.43 (m, 3H), 0.97 (t, *J* = 7.1 Hz, 3H).

**3-hydroxy-1-(naphthalen-1-yl)hexan-1-one (S15):** obtained from General Procedure A as white solid (37%). <sup>1</sup>H NMR (600 MHz, Chloroform-*d*) δ 8.67 – 8.60 (m, 1H), 7.99 – 7.93 (m, 1H), 7.85 (td, *J* = 7.5, 1.1 Hz, 2H), 7.57 (ddd, *J* = 8.5, 6.8, 1.5 Hz, 1H), 7.51 (ddd, *J* = 8.1, 6.8, 1.2 Hz, 1H), 7.46 (dd, *J* = 8.2, 7.2 Hz, 1H), 4.35 – 4.24 (m, 1H), 3.38 (s, 1H), 3.24 – 3.09 (m, 2H), 1.68 – 1.58 (m, 1H), 1.57 – 1.39 (m, 3H), 0.95 (t, *J* = 7.1 Hz, 3H).

**1-(benzo[*b*]thiophen-2-yl)-3-hydroxyhexan-1-one (S16):** obtained from General Procedure A as white solid (59%). <sup>1</sup>H NMR (600 MHz, Chloroform-*d*) δ 7.97 – 7.89 (m, 2H), 7.60 – 7.52 (m, 1H), 7.49 – 7.42 (m, 2H), 4.23 (dddd, *J* = 8.8, 7.6, 4.6, 2.8 Hz, 1H), 3.41 (br, 1H), 3.13 (dd, *J* = 17.5, 2.8 Hz, 1H), 3.05 (dd, *J* = 17.5, 8.9 Hz, 1H), 1.66 – 1.46 (m, 1H), 1.46 – 1.36 (m, 3H), 0.95 (t, *J* = 7.1 Hz, 3H).

**3-hydroxy-1-(pyridin-3-yl)hexan-1-one (S17):** obtained from General Procedure A as white solid (33%). <sup>1</sup>H NMR (600 MHz, Chloroform-*d*) δ 9.15 (dd, *J* = 2.3, 0.9 Hz, 1H), 8.77 (dd, *J* = 4.8, 1.7 Hz, 1H), 8.25 (dt, *J* = 7.9, 2.0 Hz, 1H), 7.44 (ddd, *J* = 7.9, 4.8, 0.9 Hz, 1H), 4.28 (tt, *J* = 7.9, 4.1 Hz, 1H), 3.26 – 3.05 (m, 2H), 1.71 – 1.58 (m, 1H), 1.56 – 1.48 (m, 2H), 1.48 – 1.40 (m, 1H), 0.96 (t, *J* = 7.1 Hz, 3H).

**3-hydroxy-1-(pyridin-2-yl)hexan-1-one (S18):** obtained from General Procedure A as white solid (41%). <sup>1</sup>H NMR (600 MHz, Chloroform-*d*) δ 8.68 (ddd, *J* = 4.8, 1.8, 0.9 Hz, 1H), 8.06 (dt, *J* = 7.8, 1.1 Hz, 1H), 7.87 (td, *J* = 7.7, 1.7 Hz, 1H), 7.51 (ddd, *J* = 7.6, 4.8, 1.2 Hz, 1H), 4.24 – 4.14 (m, 1H), 3.40 (dd, *J* = 16.8, 2.6 Hz, 1H), 3.27 (dd, *J* = 16.8, 8.9 Hz, 1H), 1.65 – 1.56 (m, 1H), 1.56 – 1.49 (m, 2H), 1.48 – 1.42 (m, 1H), 0.95 (t, *J* = 7.1 Hz, 3H).

**2-(1-hydroxybutyl)-3,4-dihydronaphthalen-1(2H)-one (S19):** obtained from General Procedure A as white solid (39%). <sup>1</sup>H NMR (600 MHz, Chloroform-*d*) δ 8.00 (dt, *J* = 7.9, 1.4 Hz, 1H), 7.47 (qd, *J* = 7.6, 1.5 Hz, 1H), 7.35 – 7.25 (m, 1H), 7.23 (dd, *J* = 7.7, 1.3 Hz, 1H), 4.31 (ddd, *J* = 9.4, 4.1, 3.0 Hz, 0.5H), 4.03 (ddd, *J* = 8.2, 7.1, 2.7 Hz, 0.5H), 3.08 – 2.95 (m, 2H), 2.61 – 2.49 (m, 1H), 2.25 – 2.04 (m, 2H), 1.86 (tdd, *J* = 13.2, 11.5, 5.2 Hz, 0.5H), 1.66 – 1.52 (m, 2.5H), 1.51 – 1.34 (m, 2H), 0.96 (t, *J* = 7.2 Hz, 3H).

**3-(1-hydroxybutyl)chroman-4-one (S20):** obtained from General Procedure A as yellow solid (55%). <sup>1</sup>H NMR (600 MHz, Chloroform-*d*) δ 7.87 (dt, *J* = 7.8, 2.2 Hz, 1H), 7.46 (tdd, *J* = 8.9, 7.2, 1.8 Hz, 1H), 7.00 (dddd, *J* = 10.4, 8.1, 7.2, 1.1 Hz, 1H), 6.95 (dd, *J* = 8.4, 1.0 Hz, 1H), 4.65 – 4.53 (m, 2H), 4.39 – 4.28 (m, 1H), 2.86 – 2.76 (m, 1H), 1.64 – 1.53 (m, 2H), 1.50 – 1.42 (m, 1H), 1.40 – 1.33 (m, 1H), 0.94 (t, *J* = 7.2 Hz, 3H).

**3-hydroxy-1-phenylpentan-1-one (S21):** obtained from General Procedure B as white



solid (87%). <sup>1</sup>H NMR (600 MHz, Chloroform-*d*) δ 8.00 – 7.91 (m, 2H), 7.60 – 7.55 (m, 1H), 7.49 – 7.44 (m, 2H), 4.14 (dtd, *J* = 12.9, 6.1, 3.6 Hz, 1H), 3.36 (s, 1H), 3.16 (dd, *J* = 17.5, 2.6 Hz, 1H), 3.04 (dd, *J* = 17.5, 9.1 Hz, 1H), 1.63 (dt, *J* = 13.7, 7.4 Hz, 1H), 1.60 – 1.52 (m, 1H), 1.01 (t, *J* = 7.4 Hz, 3H).

**3-hydroxy-1-phenylbutan-1-one (S22):** obtained from General Procedure A as white solid (62%). <sup>1</sup>H NMR (400 MHz, Chloroform-*d*) δ 7.98 (d, *J* = 7.7 Hz, 2H), 7.67 – 7.57 (m, 1H), 7.50 (t, *J* = 7.6 Hz, 2H), 4.51 – 4.37 (m, 1H), 3.20 (dd, *J* = 17.7, 2.8 Hz, 1H), 3.11 – 3.04 (m, 1H), 1.33 (d, *J* = 6.3 Hz, 3H).

**3-hydroxy-1-phenyltetradecan-1-one (S23):** obtained from General Procedure A as pale-yellow oil (56%). <sup>1</sup>H NMR (600 MHz, Chloroform-*d*) δ 7.97 – 7.92 (m, 2H), 7.60 – 7.55 (m, 1H), 7.50 – 7.44 (m, 2H), 4.22 (td, *J* = 8.0, 3.8 Hz, 1H), 3.31 (d, *J* = 2.9 Hz, 1H), 3.16 (dd, *J* = 17.6, 2.6 Hz, 1H), 3.04 (dd, *J* = 17.5, 9.0 Hz, 1H), 1.66 – 1.58 (m, 1H), 1.51 (dp, *J* = 10.7, 4.1 Hz, 2H), 1.32 – 1.24 (m, 16H), 0.88 (t, *J* = 7.0 Hz, 3H).

**7-chloro-3-hydroxy-1-phenylheptan-1-one (S24):** obtained from General Procedure A as yellow oil (33%). <sup>1</sup>H NMR (600 MHz, Chloroform-*d*) δ 7.98 – 7.93 (m, 2H), 7.59 (ddt, *J* = 8.7, 7.0, 1.3 Hz, 1H), 7.50 – 7.44 (m, 2H), 4.23 (dddd, *J* = 9.1, 7.5, 4.4, 2.7 Hz, 1H), 3.56 (t, *J* = 6.7 Hz, 2H), 3.17 (dd, *J* = 17.6, 2.7 Hz, 1H), 3.06 (dd, *J* = 17.6, 9.0 Hz, 1H), 1.89 – 1.78 (m, 2H), 1.73 – 1.61 (m, 2H), 1.60 – 1.52 (m, 2H).

**5-(benzo[*d*][1,3]dioxol-5-yl)-3-hydroxy-4-methyl-1-phenylpentan-1-one (S25):** obtained from General Procedure A as white solid (63%). <sup>1</sup>H NMR (600 MHz, Chloroform-*d*) δ 7.94 (ddd, *J* = 10.8, 8.3, 1.3 Hz, 2H), 7.60 – 7.55 (m, 1H), 7.46 (dt, *J* = 8.3, 7.4 Hz, 2H), 6.75 – 6.69 (m, 2H), 6.64 (td, *J* = 7.9, 1.7 Hz, 1H), 5.89 (d, *J* = 3.2 Hz, 2H), 4.17 (dt, *J* = 9.3, 2.9 Hz, 0.57H), 4.13 – 4.06 (m, 0.46H), 3.19 (dd, *J* = 17.4, 2.3 Hz, 0.50H), 3.15 – 3.03 (m, 1.59H), 2.92 (dd, *J* = 13.6, 4.6 Hz, 0.51H), 2.83 (dd, *J* = 13.5, 6.5 Hz, 0.58H), 2.43 (dd, *J* = 13.4, 8.4 Hz, 0.58H), 2.36 (dd, *J* = 13.6, 9.4 Hz, 0.46H), 1.99 – 1.90 (m, 0.51H), 1.83 (dddd, *J* = 13.5, 6.7, 3.4, 1.6 Hz, 0.58H), 0.96 (d, *J* = 6.8 Hz, 1.63H), 0.90 (d, *J* = 6.8 Hz, 1.41H).

**3-hydroxy-1-phenyl-3-(tetrahydrofuran-3-yl)propan-1-one (S26):** obtained from General Procedure A as yellow oil (43%). <sup>1</sup>H NMR (600 MHz, Chloroform-*d*) δ 7.98 – 7.87 (m, 2H), 7.61 – 7.53 (m, 1H), 7.46 (dtd, *J* = 13.9, 7.7, 2.6 Hz, 2H), 5.36 (ddq, *J* = 12.5, 6.5, 2.2 Hz, 0.4H), 4.43 (dd, *J* = 10.2, 7.5 Hz, 0.1H), 4.35 (ddd, *J* = 10.1, 7.7, 4.2 Hz, 0.33H), 4.27 – 4.07 (m, 0.83H), 4.02 – 3.73 (m, 2H), 3.71 – 3.58 (m, 1H), 3.55 – 3.41 (m, 0.7H), 3.32 – 3.16 (m, 0.52H), 3.14 – 3.06 (m, 0.60H), 3.06 – 2.90 (m, 0.51H), 2.63 – 2.34 (m, 1.32H), 2.20 (dq, *J* = 16.3, 7.7 Hz, 0.29H), 2.11 – 1.92 (m, 0.49H), 1.91 – 1.84 (m, 0.29H), 1.69 – 1.56 (m, 0.58H).

**3-hydroxy-1,4-diphenylbutan-1-one (S27):** obtained from General Procedure A as white solid (61%). <sup>1</sup>H NMR (400 MHz, Chloroform-*d*) δ 7.99 – 7.90 (m, 2H), 7.64 – 7.57 (m, 1H), 7.49 (t, *J* = 7.7 Hz, 2H), 7.39 – 7.27 (m, 2H), 7.29 – 7.21 (m, 3H), 4.52 (tt, *J* = 7.2, 3.6 Hz, 1H), 3.19 – 3.12 (m, 2H), 3.02 – 2.98 (m, 1H), 2.88 (dd, *J* = 13.5, 6.4 Hz, 1H).

**3-hydroxy-1,3-diphenylpropan-1-one (S28):** obtained from General Procedure B as

white solid (89%). <sup>1</sup>H NMR (600 MHz, Chloroform-*d*) δ 7.95 (dd, *J* = 8.4, 1.3 Hz, 2H), 7.61 – 7.56 (m, 1H), 7.49 – 7.42 (m, 4H), 7.38 (dd, *J* = 8.5, 6.9 Hz, 2H), 7.32 – 7.29 (m, 1H), 5.35 (td, *J* = 6.1, 2.7 Hz, 1H), 3.60 (d, *J* = 3.0 Hz, 1H), 3.44 – 3.28 (m, 2H).

### Synthesis of β-arylthioketone oximes

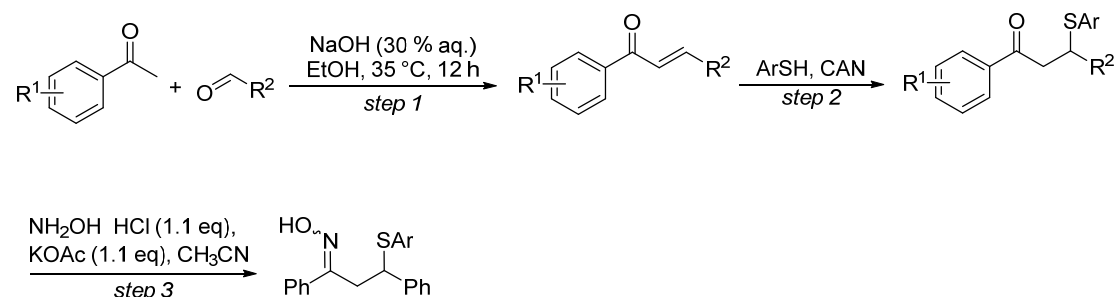

#### Step 1:

Following a modified literature procedure,<sup>6</sup> to a 20 mL vial equipped with a magnetic stirrer bar were added the corresponding aldehyde (10.0 mmol, 1.0 equiv.), acetophenone (10.0 mmol, 1.0 equiv.), and ethanol (9.0 mL). NaOH (30% aq., 10.0 mL) was then added to the resulting solution and subsequently stirred for 12 h at room temperature. The reaction mixture was extracted with EtOAc, dried over anhydrous Na<sub>2</sub>SO<sub>4</sub> and concentrated under reduced pressure. The resulting residue was purified by column chromatography on silica gel to afford the corresponding chalcones.

#### Step 2:

Following a modified literature procedure,<sup>7</sup> In a 50 mL round bottom flask were added chalcone (5 mmol) and thiophenol (5.5 mmol), ceric ammonium nitrate (CAN) (0.5 mmol) and CH<sub>3</sub>CN (2 mL). The mixture was stirred at 50 °C for 2 h. After completion of the reaction (monitored by TLC), the crude product was purified by silica gel column chromatography to give the pure product.

#### Step 3:

To a 100 mL round-bottom flask, ketone (2 mmol), hydroxylamine hydrochloride (0.15 g, 2.2 mmol), KOAc (0.59 g, 6 mmol), and CH<sub>3</sub>CN (15 mL) were added. The mixture was stirred at 70 °C for 5 h. The solvent was removed by rotary evaporation. The residue was purified by silica gel chromatography to provide the desired product.

### Characterizations of substrates

**3-(naphthalen-2-ylthio)-3-phenyl-1-(p-tolyl)propan-1-one (29):** <sup>1</sup>H NMR (600 MHz, CDCl<sub>3</sub>) δ 7.79 – 7.75 (m, 3H), 7.69 (t, *J* = 9.1 Hz, 2H), 7.46 – 7.42 (m, 2H), 7.42 – 7.39 (m, 1H), 7.38 – 7.35 (m, 2H), 7.26 – 7.22 (m, 2H), 7.19 (t, *J* = 8.6 Hz, 3H), 5.08 (dd, *J* = 8.0, 6.1 Hz, 1H), 3.62 (qd, *J* = 17.1, 7.1 Hz, 2H), 2.38 (s, 3H).

**3-(naphthalen-2-ylthio)-3-phenyl-1-(p-tolyl)propan-1-one oxime (30):** <sup>1</sup>H NMR (600 MHz, CDCl<sub>3</sub>) δ 7.64 (q, *J* = 3.6 Hz, 2H), 7.56 – 7.51 (m, 2H), 7.32 (dt, *J* = 6.3, 3.4 Hz, 2H), 7.23 – 7.17 (m, 3H), 7.13 (d, *J* = 8.1 Hz, 2H), 7.11 – 7.04 (m, 3H), 7.00

(d,  $J = 7.8$  Hz, 2H), 4.69 (dd,  $J = 8.6, 7.1$  Hz, 1H), 3.41 (dd,  $J = 13.8, 7.1$  Hz, 1H), 3.34 (dd,  $J = 13.8, 8.7$  Hz, 1H), 2.25 (s, 3H).

**3-(4-methoxyphenyl)-3-(phenylthio)-1-(p-tolyl)propan-1-one (S31):** white solid (92%).  $^1\text{H NMR}$  (600 MHz,  $\text{CDCl}_3$ )  $\delta$  7.78 – 7.74 (m, 2H), 7.36 – 7.31 (m, 2H), 7.25 (d,  $J = 8.7$  Hz, 2H), 7.22 – 7.16 (m, 5H), 6.76 (d,  $J = 8.7$  Hz, 2H), 4.93 (dd,  $J = 8.5, 5.6$  Hz, 1H), 3.71 (s, 3H), 3.59 (dd,  $J = 17.0, 8.6$  Hz, 1H), 3.50 (dd,  $J = 17.0, 5.7$  Hz, 1H), 2.35 (s, 3H).

**3-(4-methoxyphenyl)-3-(phenylthio)-1-(p-tolyl)propan-1-one oxime (S32):** white solid (80%).  $^1\text{H NMR}$  (600 MHz, Chloroform-*d*)  $\delta$  9.27 (s, 1H), 7.25 (dd,  $J = 6.6, 3.0$  Hz, 2H), 7.21 – 7.19 (m, 2H), 7.18 – 7.15 (m, 3H), 7.15 – 7.12 (m, 2H), 7.09 (d,  $J = 7.9$  Hz, 2H), 6.70 (d,  $J = 8.7$  Hz, 2H), 4.59 (dd,  $J = 8.7, 7.0$  Hz, 1H), 3.71 (s, 3H), 3.43 – 3.35 (m, 2H), 3.43 – 3.35 (m, 3H).

**1-(4-chlorophenyl)-3-(4-methoxyphenyl)-3-(phenylthio)propan-1-one (S33):** white solid (76%).  $^1\text{H NMR}$  (400 MHz, Chloroform-*d*)  $\delta$  7.82 (d,  $J = 8.5$  Hz, 2H), 7.42 (d,  $J = 8.5$  Hz, 2H), 7.37 – 7.32 (m, 2H), 7.30 – 7.23 (m, 5H), 6.81 (d,  $J = 8.7$  Hz, 2H), 4.92 (dd,  $J = 8.4, 5.8$  Hz, 1H), 3.78 (s, 3H), 3.61 (dd,  $J = 17.0, 8.4$  Hz, 1H), 3.52 (dd,  $J = 17.0, 5.8$  Hz, 1H).

**1-(4-chlorophenyl)-3-(4-methoxyphenyl)-3-(phenylthio)propan-1-one oxime (S34):** pale-yellow solid (81%).  $^1\text{H NMR}$  (400 MHz, Chloroform-*d*)  $\delta$  7.33 – 7.20 (m, 10H), 7.19 – 7.13 (m, 2H), 6.76 – 6.72 (m, 2H), 4.56 (t,  $J = 7.9$  Hz, 1H), 3.77 (d,  $J = 1.1$  Hz, 3H), 3.49 – 3.35 (m, 2H).

**1-(4-bromophenyl)-3-(4-methoxyphenyl)-3-(phenylthio)propan-1-one (S35):** white solid (76%).  $^1\text{H NMR}$  (600 MHz, Chloroform-*d*)  $\delta$  7.72 – 7.67 (m, 2H), 7.55 – 7.51 (m, 2H), 7.34 – 7.30 (m, 2H), 7.27 – 7.18 (m, 5H), 6.80 – 6.74 (m, 2H), 4.89 (dd,  $J = 8.4, 5.7$  Hz, 1H), 3.72 (s, 3H), 3.56 (dd,  $J = 17.0, 8.5$  Hz, 1H), 3.48 (dd,  $J = 17.0, 5.7$  Hz, 1H).

**1-(4-bromophenyl)-3-(4-methoxyphenyl)-3-(phenylthio)propan-1-one oxime (S36):** white solid (66%).  $^1\text{H NMR}$  (600 MHz, Chloroform-*d*)  $\delta$  8.72 (s, 1H), 7.42 – 7.38 (m, 2H), 7.27 – 7.24 (m, 2H), 7.21 – 7.10 (m, 7H), 6.70 (d,  $J = 8.6$  Hz, 2H), 4.53 (t,  $J = 7.9$  Hz, 1H), 3.73 (s, 3H), 3.36 (d,  $J = 7.9$  Hz, 2H).

**3-(4-methoxyphenyl)-3-(phenylthio)-1-(p-tolyl)propan-1-one (S37):** white solid (63%).  $^1\text{H NMR}$  (600 MHz, Chloroform-*d*)  $\delta$  8.11 (t,  $J = 1.8$  Hz, 2H), 7.95 (t,  $J = 1.8$  Hz, 1H), 7.90 (ddd,  $J = 7.8, 1.7, 1.1$  Hz, 2H), 7.80 (s, 1H), 7.77 (s, 1H), 7.76 – 7.74 (m, 1H), 7.66 (ddd,  $J = 7.9, 2.0, 1.0$  Hz, 2H), 7.62 (ddd,  $J = 7.9, 2.0, 1.0$  Hz, 1H), 7.49 – 7.46 (m, 1H), 7.31 (d,  $J = 1.3$  Hz, 1H), 4.89 (dd,  $J = 8.4, 5.7$  Hz, 1H), 3.73 (s, 3H), 3.57 (dd,  $J = 17.1, 8.5$  Hz, 1H), 3.49 (dd,  $J = 17.1, 5.7$  Hz, 1H).

**1-(3-bromophenyl)-3-(4-methoxyphenyl)-3-(phenylthio)propan-1-one oxime (S38):** yellow solid (71%).  $^1\text{H NMR}$  (600 MHz, Chloroform-*d*)  $\delta$  9.30 (s, 1H), 7.35 – 7.29 (m, 1H), 7.24 (q,  $J = 2.0$  Hz, 1H), 7.19 (dt,  $J = 8.2, 2.0$  Hz, 2H), 7.14 – 7.07 (m, 4H), 7.06 – 6.98 (m, 3H), 6.64 – 6.58 (m, 2H), 4.50 (dd,  $J = 9.4, 6.2$  Hz, 1H), 3.62 (s, 3H), 3.30

(dd,  $J = 13.7, 6.2$  Hz, 1H), 3.21 (ddd,  $J = 12.3, 9.2, 2.4$  Hz, 1H).

**1-(2-chlorophenyl)-3-(4-methoxyphenyl)-3-(phenylthio)propan-1-one (S39):** yellow solid (72%).  $^1\text{H NMR}$  (600 MHz, Chloroform-*d*)  $\delta$  7.50 – 7.46 (m, 1H), 7.34 – 7.31 (m, 1H), 7.30 – 7.27 (m, 3H), 7.21 – 7.19 (m, 4H), 7.17 (d,  $J = 8.7$  Hz, 2H), 6.77 – 6.74 (m, 2H), 4.79 (dd,  $J = 8.3, 6.6$  Hz, 1H), 3.72 (s, 3H), 3.61 – 3.50 (m, 2H).

**1-(2-chlorophenyl)-3-(4-methoxyphenyl)-3-(phenylthio)propan-1-one oxime (S40):** white solid (62%).  $^1\text{H NMR}$  (600 MHz, Chloroform-*d*)  $\delta$  7.31 (dd,  $J = 8.0, 1.1$  Hz, 1H), 7.23 – 7.21 (m, 3H), 7.19 – 7.16 (m, 4H), 7.03 (td,  $J = 7.5, 1.2$  Hz, 1H), 7.02 – 6.99 (m, 1H), 6.70 (dd,  $J = 7.6, 1.7$  Hz, 1H), 6.68 – 6.66 (m, 2H), 4.48 (dd,  $J = 9.5, 6.7$  Hz, 1H), 3.72 (s, 3H), 3.55 (dd,  $J = 14.8, 6.8$  Hz, 1H), 3.41 (dd,  $J = 14.7, 9.5$  Hz, 1H).

**3-(4-methoxyphenyl)-3-(naphthalen-2-ylthio)-1-(o-tolyl)propan-1-one (S41):** white solid (63%).  $^1\text{H NMR}$  (400 MHz, Chloroform-*d*)  $\delta$  7.84 – 7.78 (m, 2H), 7.73 (dd,  $J = 8.5, 5.8$  Hz, 2H), 7.52 – 7.47 (m, 3H), 7.44 – 7.39 (m, 2H), 7.37 (t,  $J = 7.4$  Hz, 1H), 7.30 – 7.18 (m, 3H), 6.84 – 6.79 (m, 2H), 5.00 (t,  $J = 7.4$  Hz, 1H), 3.78 (s, 3H), 3.60 – 3.53 (m, 2H), 2.34 (s, 3H).

**3-(4-methoxyphenyl)-3-(naphthalen-2-ylthio)-1-(o-tolyl)propan-1-one oxime (S42):** yellow solid (61%).  $^1\text{H NMR}$  (600 MHz, Chloroform-*d*)  $\delta$  7.69 – 7.65 (m, 1H), 7.60 (d,  $J = 1.8$  Hz, 0.38H), 7.58 – 7.54 (m, 1.67H), 7.37 – 7.33 (m, 1.45H), 7.26 – 7.19 (m, 1.55H), 7.19 – 7.15 (m, 1.72H), 7.14 – 7.10 (m, 1.28H), 7.05 (dd,  $J = 14.2, 7.9$  Hz, 1.50H), 7.02 – 6.97 (m, 1.51H), 6.75 (td,  $J = 8.2, 1.8$  Hz, 1.34H), 6.68 (d,  $J = 8.6$  Hz, 0.66H), 6.62 (d,  $J = 8.7$  Hz, 1H), 4.49 (dd,  $J = 9.4, 6.6$  Hz, 0.4H), 4.39 – 4.31 (m, 0.36H), 3.74 – 3.68 (m, 1H), 3.68 – 3.62 (m, 2H), 3.40 (dd,  $J = 14.5, 9.5$  Hz, 0.5H), 3.33 (dd,  $J = 14.5, 6.6$  Hz, 0.5H), 3.15 – 3.03 (m, 1H), 2.17 (d,  $J = 23.4$  Hz, 1H), 2.02 – 1.93 (m, 2H).

**3-(4-methoxyphenyl)-3-(naphthalen-2-ylthio)-1-(4-pentylphenyl)propan-1-one (S43):** white solid (81%).  $^1\text{H NMR}$  (400 MHz, Chloroform-*d*)  $\delta$  7.82 (d,  $J = 8.1$  Hz, 3H), 7.73 (dd,  $J = 8.1, 5.4$  Hz, 2H), 7.51 – 7.43 (m, 4H), 7.34 (d,  $J = 8.5$  Hz, 2H), 7.24 (d,  $J = 8.0$  Hz, 2H), 6.82 (d,  $J = 8.5$  Hz, 2H), 5.11 (dd,  $J = 8.3, 5.8$  Hz, 1H), 3.77 (s, 3H), 3.74 – 3.55 (m, 2H), 2.66 (t,  $J = 7.7$  Hz, 2H), 1.75 – 1.58 (m, 2H), 1.42 – 1.28 (m, 4H), 0.92 (t,  $J = 6.8$  Hz, 3H).

**3-(4-methoxyphenyl)-3-(naphthalen-2-ylthio)-1-(4-pentylphenyl)propan-1-one oxime (S44):** white solid (69%).  $^1\text{H NMR}$  (400 MHz, Chloroform-*d*)  $\delta$  7.81 – 7.75 (m, 2H), 7.69 (dd,  $J = 7.4, 3.8$  Hz, 2H), 7.50 – 7.44 (m, 2H), 7.34 (d,  $J = 8.7$  Hz, 1H), 7.26 (d,  $J = 7.9$  Hz, 2H), 7.22 – 7.18 (m, 2H), 7.11 (d,  $J = 7.9$  Hz, 2H), 6.74 (d,  $J = 8.3$  Hz, 2H), 4.71 (d,  $J = 7.9$  Hz, 1H), 3.76 (d,  $J = 1.1$  Hz, 3H), 3.47 (dd,  $J = 8.0, 3.6$  Hz, 2H), 2.61 (t,  $J = 7.8$  Hz, 2H), 1.62 (p,  $J = 7.4$  Hz, 2H), 1.46 – 1.26 (m, 4H), 0.92 (t,  $J = 6.7$  Hz, 3H).

**3-(4-methoxyphenyl)-1-(naphthalen-2-yl)-3-(naphthalen-2-ylthio)propan-1-one (S45):** white solid (76%).  $^1\text{H NMR}$  (400 MHz, Chloroform-*d*)  $\delta$  7.97 – 7.84 (m, 3H), 7.81 (dt,  $J = 9.5, 3.3$  Hz, 2H), 7.77 – 7.69 (m, 3H), 7.68 – 7.62 (m, 2H), 7.48 (td,  $J = 5.7, 2.3$  Hz, 4H), 7.37 (d,  $J = 8.4$  Hz, 2H), 6.82 (d,  $J = 8.3$  Hz, 2H), 5.15 (dd,  $J = 8.0,$

6.2 Hz, 1H), 3.83 – 3.74 (m, 5H).

**3-(4-methoxyphenyl)-1-(naphthalen-2-yl)-3-(naphthalen-2-ylthio)propan-1-one oxime (S46):** pale yellow solid (59%). <sup>1</sup>H NMR (400 MHz, DMSO-*d*<sub>6</sub>) δ 11.59 (s, 1H), 7.86 (d, *J* = 7.7 Hz, 4H), 7.80 (d, *J* = 8.4 Hz, 3H), 7.68 (d, *J* = 8.5 Hz, 1H), 7.49 (tt, *J* = 9.7, 2.7 Hz, 5H), 7.41 – 7.37 (m, 1H), 7.32 (d, *J* = 8.2 Hz, 2H), 6.74 (d, *J* = 8.2 Hz, 2H), 4.93 (t, *J* = 7.8 Hz, 1H), 3.61 (s, 3H), 3.51 (d, *J* = 7.8 Hz, 2H).

### Characterizations of Products

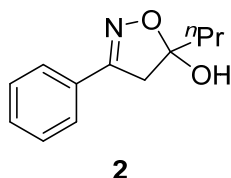

**3-phenyl-5-propyl-4,5-dihydroisoxazol-5-ol (2).**<sup>8</sup> On 0.2 mmol scale. Purification by silica gel chromatography (petroleum: ethyl acetate = 5: 1).

White solid (32.6 mg, 87% yield).

<sup>1</sup>H NMR (600 MHz, Chloroform-*d*) δ 7.62 – 7.57 (m, 2H), 7.39 – 7.32 (m, 3H), 4.22 (s, 1H), 3.31 – 3.11 (m, 2H), 1.94 (ddd, *J* = 13.9, 11.3, 5.2 Hz, 1H), 1.87 (ddd, *J* = 14.0, 11.2, 5.3 Hz, 1H), 1.56 – 1.42 (m, 2H), 0.95 (t, *J* = 7.4 Hz, 3H);

<sup>13</sup>C NMR (151 MHz, Chloroform-*d*) δ 157.4, 130.2, 129.6, 128.7, 126.7, 109.0, 44.4, 40.3, 18.1, 14.2;

HRMS (ESI): Calcd for C<sub>12</sub>H<sub>16</sub>NO<sub>2</sub> [M+H]<sup>+</sup>: 206.1176; found 206.1170.

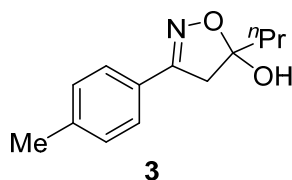

**5-propyl-3-(p-tolyl)-4,5-dihydroisoxazol-5-ol (3).** On 0.2 mmol scale. Purification by silica gel chromatography (petroleum: ethyl acetate = 4: 1).

White solid (36.5 mg, 83% yield).

<sup>1</sup>H NMR (600 MHz, CDCl<sub>3</sub>) δ 7.57 – 7.54 (m, 2H), 7.20 (d, *J* = 7.9 Hz, 2H), 3.25 (d, *J* = 0.8 Hz, 2H), 2.81 (s, 1H), 2.38 (s, 3H), 2.09 – 1.89 (m, 2H), 1.69 – 1.48 (m, 2H), 1.01 (t, *J* = 7.4 Hz, 3H);

<sup>13</sup>C NMR (151 MHz, Chloroform-*d*) δ 157.4, 140.5, 129.4, 126.8, 126.6, 108.7, 44.6, 40.5, 21.5, 18.1, 14.2.;

HRMS (ESI): Calcd for C<sub>13</sub>H<sub>18</sub>NO<sub>2</sub> [M+H]<sup>+</sup>: 220.1332; found 220.1337.

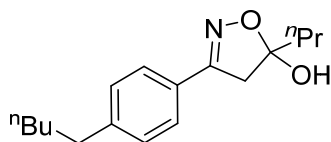

4

**3-(4-pentylphenyl)-5-propyl-4,5-dihydroisoxazol-5-ol (4).** On 0.2 mmol scale. Purification by silica gel chromatography (petroleum: ethyl acetate = 6: 1).

White solid (44.6 mg, 81% yield).

$^1\text{H}$  NMR (600 MHz, Chloroform-*d*)  $\delta$  7.57 – 7.52 (m, 2H), 7.21 – 7.17 (m, 2H), 3.41 (s, 1H), 3.28 – 3.19 (m, 2H), 2.61 (t,  $J$  = 7.7 Hz, 2H), 2.00 – 1.87 (m, 2H), 1.66 – 1.58 (m, 2H), 1.57 – 1.47 (m, 2H), 1.35 – 1.31 (m, 4H), 0.98 (t,  $J$  = 7.4 Hz, 3H), 0.89 (t,  $J$  = 6.9 Hz, 3H);

$^{13}\text{C}$  NMR (151 MHz,  $\text{CDCl}_3$ )  $\delta$  157.4, 145.5, 128.8, 126.9, 126.7, 108.7, 44.6, 40.4, 35.8, 31.4, 30.9, 22.5, 18.1, 14.2, 14.0;

**HRMS** (ESI): Calcd for  $\text{C}_{17}\text{H}_{26}\text{NO}_2$   $[\text{M}+\text{H}]^+$ : 276.1958; found 276.1962.

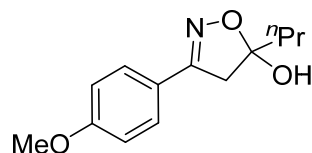

5

**3-(4-methoxyphenyl)-5-propyl-4,5-dihydroisoxazol-5-ol (5).** On 0.2 mmol scale. Purification by silica gel chromatography (petroleum: ethyl acetate = 3: 1).

White solid (39.8 mg, 85% yield).

$^1\text{H}$  NMR (600 MHz, Chloroform-*d*)  $\delta$  7.57 (d,  $J$  = 8.8 Hz, 2H), 6.89 (d,  $J$  = 8.9 Hz, 2H), 3.83 (s, 3H), 3.49 – 3.37 (m, 1H), 3.22 (s, 2H), 1.99 – 1.87 (m, 2H), 1.63 – 1.46 (m, 2H), 0.99 (t,  $J$  = 7.4 Hz, 3H);

$^{13}\text{C}$  NMR (151 MHz, Chloroform-*d*)  $\delta$  161.1, 157.0, 128.3, 122.2, 114.1, 108.6, 55.4, 44.7, 40.4, 18.1, 14.2;

**HRMS** (ESI): Calcd for  $\text{C}_{13}\text{H}_{18}\text{NO}_3$   $[\text{M}+\text{H}]^+$ : 236.1281; found 236.1289.

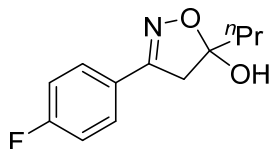

6

**3-(4-fluorophenyl)-5-propyl-4,5-dihydroisoxazol-5-ol (6).** On 0.2 mmol scale. Purification by silica gel chromatography (petroleum: ethyl acetate = 6: 1).

White solid (32.2 mg, 72% yield).

$^1\text{H}$  NMR (600 MHz, Chloroform-*d*)  $\delta$  7.70 – 7.58 (m, 2H), 7.08 (t,  $J$  = 8.7 Hz, 2H), 3.39 (s, 1H), 3.23 (s, 2H), 2.01 – 1.89 (m, 2H), 1.59 – 1.47 (m, 2H), 1.00 (t,  $J$  = 7.4 Hz, 3H);

$^{13}\text{C}$  NMR (151 MHz, Chloroform-*d*)  $\delta$  163.8 (d,  $J$  = 207.5 Hz), 156.4, 128.7 (d,  $J$  = 7.5

Hz), 125.8(d,  $J = 2.5$  Hz), 115.8 (d,  $J = 18.7$  Hz), 109.0, 44.5, 40.4, 18.1, 14.1;

$^{19}\text{F}$  NMR (565 MHz, Chloroform-*d*)  $\delta$  -109.70;

**HRMS** (ESI): Calcd for  $\text{C}_{12}\text{H}_{14}\text{FNNO}_2$   $[\text{M}+\text{Na}]^+$ : 246.0901; found 246.0906.

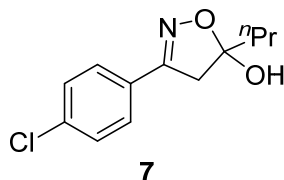

**3-(4-chlorophenyl)-5-propyl-4,5-dihydroisoxazol-5-ol (7).** On 0.2 mmol scale. Purification by silica gel chromatography (petroleum: ethyl acetate = 6: 1).

White solid (36.8 mg, 77% yield).

$^1\text{H}$  NMR (600 MHz, Chloroform-*d*)  $\delta$  7.53 (d,  $J = 8.6$  Hz, 2H), 7.33 (d,  $J = 8.6$  Hz, 2H), 3.94 (s, 1H), 3.26 – 3.15 (m, 2H), 1.92 (dddd,  $J = 38.5, 14.0, 11.0, 5.2$  Hz, 2H), 1.56 – 1.44 (m, 2H), 0.97 (t,  $J = 7.4$  Hz, 3H);

$^{13}\text{C}$  NMR (151 MHz, Chloroform-*d*)  $\delta$  156.5, 136.2, 129.0, 128.1, 127.9, 109.2, 44.2, 40.3, 18.1, 14.1;

**HRMS** (ESI): Calcd for  $\text{C}_{12}\text{H}_{15}\text{ClNO}_2$   $[\text{M}+\text{H}]^+$ : 240.0786; found 240.0788.

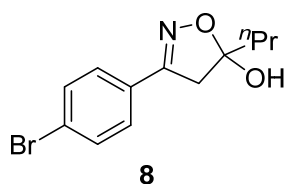

**3-(4-bromophenyl)-5-propyl-4,5-dihydroisoxazol-5-ol (8).** On 0.2 mmol scale. Purification by silica gel chromatography (petroleum: ethyl acetate = 6: 1).

Pale-yellow solid (44.6 mg, 79% yield).

$^1\text{H}$  NMR (600 MHz, Chloroform-*d*)  $\delta$  7.39 (d,  $J = 8.3$  Hz, 2H), 7.36 (d,  $J = 8.4$  Hz, 2H), 4.41 – 4.17 (m, 1H), 3.17 – 3.05 (m, 2H), 1.92 – 1.74 (m, 2H), 1.53 – 1.34 (m, 2H), 0.87 (t,  $J = 7.4$  Hz, 3H);

$^{13}\text{C}$  NMR (151 MHz, Chloroform-*d*)  $\delta$  156.6, 131.9, 128.5, 128.1, 124.5, 109.3, 44.1, 40.3, 18.1, 14.1;

**HRMS** (ESI): Calcd for  $\text{C}_{12}\text{H}_{15}\text{BrNO}_2$   $[\text{M}+\text{H}]^+$ : 284.0281, 286.0261; found 284.0289, 286.0265.

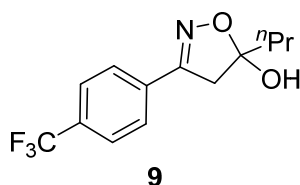

**5-propyl-3-(4-(trifluoromethyl)phenyl)-4,5-dihydroisoxazol-5-ol (9).** On 0.2 mmol scale. Purification by silica gel chromatography (petroleum: ethyl acetate = 6: 1).

White solid (33.8 mg, 62% yield).

$^1\text{H}$  NMR (600 MHz, Chloroform-*d*)  $\delta$  7.81 – 7.71 (m, 2H), 7.64 (d,  $J = 8.2$  Hz, 2H), 3.49 (s, 1H), 3.26 (s, 2H), 2.03 – 1.91 (m, 2H), 1.61 – 1.46 (m, 2H), 1.00 (t,  $J = 7.3$  Hz, 3H);

$^{13}\text{C}$  NMR (151 MHz, Chloroform-*d*)  $\delta$  156.3, 133.0, 131.8 (q,  $J = 32.7$  Hz), 126.9, 125.7 (q,  $J = 3.8$  Hz), 123.8 (q,  $J = 272.3$  Hz), 109.5, 44.0, 40.4, 18.1, 14.1;

$^{19}\text{F}$  NMR (565 MHz, Chloroform-*d*)  $\delta$  -62.92;

**HRMS** (ESI): Calcd for  $\text{C}_{13}\text{H}_{15}\text{F}_3\text{NO}_2$   $[\text{M}+\text{H}]^+$ : 274.1049; found 274.1041.

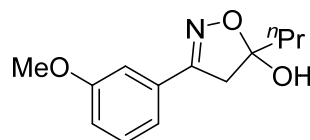

**10**

**3-(3-methoxyphenyl)-5-propyl-4,5-dihydroisoxazol-5-ol (10).** On 0.2 mmol scale. Purification by silica gel chromatography (petroleum: ethyl acetate = 3: 1).

White solid (33.3 mg, 71% yield).

$^1\text{H}$  NMR (600 MHz, Chloroform-*d*)  $\delta$  7.31 – 7.27 (m, 1H), 7.25 (dd,  $J = 2.6, 1.5$  Hz, 1H), 7.15 (ddd,  $J = 7.6, 1.5, 1.0$  Hz, 1H), 6.95 (ddd,  $J = 8.3, 2.6, 0.9$  Hz, 1H), 3.83 (s, 3H), 3.24 (s, 2H), 3.22 – 3.17 (m, 1H), 1.95 (qdd,  $J = 14.0, 10.8, 5.6$  Hz, 2H), 1.61 – 1.48 (m, 2H), 1.00 (t,  $J = 7.4$  Hz, 3H);

$^{13}\text{C}$  NMR (151 MHz, Chloroform-*d*)  $\delta$  159.7, 157.3, 130.8, 129.7, 119.4, 116.7, 111.2, 108.9, 55.4, 44.5, 40.5, 18.1, 14.1;

**HRMS** (ESI): Calcd for  $\text{C}_{13}\text{H}_{18}\text{NO}_3$   $[\text{M}+\text{H}]^+$ : 236.1281; found 236.1282.

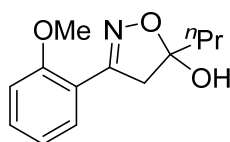

**11**

**3-(2-methoxyphenyl)-5-propyl-4,5-dihydroisoxazol-5-ol (11).** On 0.2 mmol scale. Purification by silica gel chromatography (petroleum: ethyl acetate = 2: 1).

White solid (29.6 mg, 63% yield).

$^1\text{H}$  NMR (600 MHz, Chloroform-*d*)  $\delta$  7.68 (d,  $J = 7.5$  Hz, 1H), 7.30 (t,  $J = 7.9$  Hz, 1H), 6.90 (t,  $J = 7.4$  Hz, 1H), 6.85 (d,  $J = 8.2$  Hz, 1H), 3.78 (d,  $J = 4.0$  Hz, 3H), 3.36 – 3.27 (m, 2H), 2.89 (s, 1H), 1.86 (tt,  $J = 13.6, 7.0$  Hz, 2H), 1.55 – 1.40 (m, 2H), 0.93 (t,  $J = 7.3$  Hz, 3H);

$^{13}\text{C}$  NMR (151 MHz, Chloroform-*d*)  $\delta$  157.5, 156.8, 131.4, 129.3, 120.9, 118.8, 111.4, 108.4, 55.5, 47.4, 40.4, 18.1, 14.2;

**HRMS** (ESI): Calcd for  $\text{C}_{13}\text{H}_{18}\text{NO}_3$   $[\text{M}+\text{H}]^+$ : 236.1281; found 236.1286.

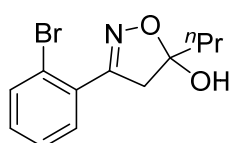

**12**



**3-(2-bromophenyl)-5-propyl-4,5-dihydroisoxazol-5-ol (12).** On 0.2 mmol scale. Purification by silica gel chromatography (petroleum: ethyl acetate = 5: 1).

White solid (26.1 mg, 46% yield).

$^1\text{H}$  NMR (600 MHz, Chloroform-*d*)  $\delta$  7.52 (dd,  $J = 8.0, 1.2$  Hz, 1H), 7.47 (dd,  $J = 7.7, 1.8$  Hz, 1H), 7.25 (td,  $J = 7.5, 1.3$  Hz, 1H), 7.17 (td,  $J = 7.7, 1.8$  Hz, 1H), 3.67 (s, 1H), 3.42 (d,  $J = 17.8$  Hz, 1H), 3.25 (d,  $J = 17.7$  Hz, 1H), 1.92 – 1.83 (m, 2H), 1.51 – 1.40 (m, 2H), 0.91 (t,  $J = 7.4$  Hz, 3H);

$^{13}\text{C}$  NMR (151 MHz, Chloroform-*d*)  $\delta$  158.3, 133.7, 131.2, 131.1, 131.0, 127.6, 121.8, 109.4, 47.0, 40.3, 18.1, 14.2;

**HRMS** (ESI): Calcd for  $\text{C}_{12}\text{H}_{15}\text{BrNO}_2$   $[\text{M}+\text{H}]^+$ : 284.0281, 286.0261; found 284.0280, 286.0269.

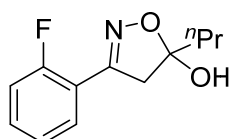

**13**

**3-(2-fluorophenyl)-5-propyl-4,5-dihydroisoxazol-5-ol (13).** On 0.2 mmol scale. Purification by silica gel chromatography (petroleum: ethyl acetate = 6: 1).

White solid (13.8 mg, 31% yield).

$^1\text{H}$  NMR (600 MHz, Chloroform-*d*)  $\delta$  7.87 (td,  $J = 7.6, 1.8$  Hz, 1H), 7.42 – 7.35 (m, 1H), 7.17 (td,  $J = 7.5, 1.2$  Hz, 1H), 7.10 (ddd,  $J = 11.3, 8.4, 1.2$  Hz, 1H), 3.41 – 3.32 (m, 2H), 3.17 (br, 1H), 1.96 (qdd,  $J = 14.0, 10.8, 5.6$  Hz, 2H), 1.60 – 1.50 (m, 2H), 1.01 (t,  $J = 7.4$  Hz, 3H);

$^{13}\text{C}$  NMR (151 MHz, Chloroform-*d*)  $\delta$  160.4 (d,  $J = 252.4$  Hz), 154.0 (d,  $J = 2.9$  Hz), 131.9 (d,  $J = 8.7$  Hz), 128.9 (d,  $J = 3.2$  Hz), 124.5 (d,  $J = 3.3$  Hz), 117.7 (d,  $J = 11.5$  Hz), 116.4 (d,  $J = 22.2$  Hz), 108.9 (d,  $J = 2.7$  Hz), 46.3 (d,  $J = 6.9$  Hz), 40.4, 18.1, 14.1;

$^{19}\text{F}$  NMR (565 MHz, Chloroform-*d*)  $\delta$  -112.85;

**HRMS** (ESI): Calcd for  $\text{C}_{12}\text{H}_{15}\text{FNO}_2$   $[\text{M}+\text{H}]^+$ : 224.1081; found 224.1077.

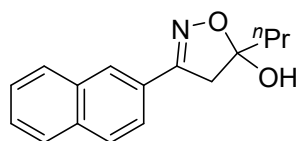

**14**

**3-(naphthalen-2-yl)-5-propyl-4,5-dihydroisoxazol-5-ol (14).** On 0.2 mmol scale. Purification by silica gel chromatography (petroleum: ethyl acetate = 5: 1).

White solid (38.3 mg, 75% yield).

$^1\text{H}$  NMR (600 MHz, Chloroform-*d*)  $\delta$  7.88 (dd,  $J = 8.6, 1.7$  Hz, 1H), 7.81 – 7.80 (m, 1H), 7.79 – 7.77 (m, 1H), 7.77 – 7.75 (m, 2H), 7.47 (dddd,  $J = 18.1, 8.1, 6.9, 1.4$  Hz, 2H), 3.83 (s, 1H), 3.42 – 3.26 (m, 2H), 2.04 – 1.88 (m, 2H), 1.60 – 1.48 (m, 2H), 0.97 (t,  $J = 7.4$  Hz, 3H);

$^{13}\text{C}$  NMR (151 MHz, Chloroform-*d*)  $\delta$  157.6, 134.1, 132.9, 128.5, 128.4, 127.8, 127.2, 127.1, 127.1, 126.7, 123.3, 109.1, 44.4, 40.4, 18.2, 14.2;

**HRMS** (ESI): Calcd for C<sub>16</sub>H<sub>18</sub>NO<sub>2</sub> [M+H]<sup>+</sup>: 256.1332; found 256.1335.

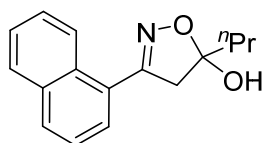

**15**

**3-(naphthalen-1-yl)-5-propyl-4,5-dihydroisoxazol-5-ol (15).** On 0.2 mmol scale. Purification by silica gel chromatography (petroleum: ethyl acetate = 5: 1). White solid (29.3 mg, 53% yield).

<sup>1</sup>H NMR (600 MHz, Chloroform-*d*) δ 8.95 (dt, *J* = 8.6, 1.0 Hz, 1H), 7.89 (ddt, *J* = 13.3, 8.1, 1.0 Hz, 2H), 7.60 (ddd, *J* = 8.4, 6.8, 1.4 Hz, 1H), 7.57 – 7.52 (m, 2H), 7.47 (dd, *J* = 8.1, 7.2 Hz, 1H), 3.47 (q, *J* = 17.1 Hz, 2H), 2.82 (s, 1H), 2.08 – 1.99 (m, 2H), 1.69 – 1.60 (m, 2H), 1.05 (t, *J* = 7.4 Hz, 3H);

<sup>13</sup>C NMR (151 MHz, Chloroform-*d*) δ 158.2, 134.0, 131.0, 130.6, 128.6, 127.8, 127.6, 127.0, 126.4, 124.8, 107.5, 47.5, 40.4, 18.2, 14.2;

**HRMS** (ESI): Calcd for C<sub>16</sub>H<sub>17</sub>NNaO<sub>2</sub> [M+H]<sup>+</sup>: 278.1151; found 278.1153.

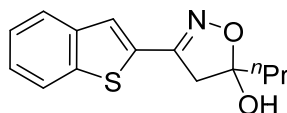

**16**

**3-(benzo[b]thiophen-2-yl)-5-propyl-4,5-dihydroisoxazol-5-ol (16).** On 0.2 mmol scale. Purification by silica gel chromatography (petroleum: ethyl acetate = 4: 1). Yellow solid (20.3 mg, 39% yield).

<sup>1</sup>H NMR (600 MHz, Chloroform-*d*) δ 7.83 – 7.78 (m, 1H), 7.76 – 7.71 (m, 1H), 7.41 – 7.32 (m, 3H), 3.34 (s, 2H), 3.16 (d, *J* = 11.6 Hz, 1H), 1.98 (qdd, *J* = 14.0, 10.7, 5.6 Hz, 2H), 1.61 – 1.50 (m, 2H), 1.01 (t, *J* = 7.4 Hz, 3H);

<sup>13</sup>C NMR (151 MHz, Chloroform-*d*) δ 153.7, 140.4, 139.0, 132.4, 126.1, 125.8, 124.7, 124.2, 122.5, 109.6, 44.8, 40.4, 18.1, 14.1.;

**HRMS** (ESI): Calcd for C<sub>14</sub>H<sub>16</sub>NO<sub>2</sub>S [M+H]<sup>+</sup>: 262.0896; found 262.0898.

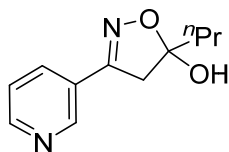

**17**

**5-propyl-3-(pyridin-3-yl)-4,5-dihydroisoxazol-5-ol (17).** On 0.2 mmol scale. Purification by silica gel chromatography (petroleum: ethyl acetate = 2: 1). White solid (18.9 mg, 46% yield).

<sup>1</sup>H NMR (600 MHz, Chloroform-*d*) δ 8.63 (d, *J* = 2.2 Hz, 1H), 8.48 (dd, *J* = 4.9, 1.6 Hz, 1H), 7.91 (dt, *J* = 8.0, 1.9 Hz, 1H), 7.23 (dd, *J* = 8.0, 4.8 Hz, 1H), 3.16 (s, 2H), 1.93 (ddd, *J* = 14.0, 11.2, 5.3 Hz, 1H), 1.86 (ddd, *J* = 14.0, 11.1, 5.3 Hz, 1H), 1.55 – 1.41 (m, 2H), 0.91 (t, *J* = 7.4 Hz, 3H);

<sup>13</sup>C NMR (151 MHz, Chloroform-*d*) δ 154.6, 150.4, 147.2, 133.9, 126.3, 123.8, 109.6, 43.7, 40.4, 18.2, 14.2.;

**HRMS** (ESI): Calcd for C<sub>11</sub>H<sub>15</sub>N<sub>2</sub>O<sub>2</sub> [M+H]<sup>+</sup>: 207.1128; found 207.1129.

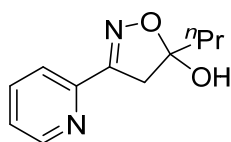

**18**

**5-propyl-3-(pyridin-2-yl)-4,5-dihydroisoxazol-5-ol (18).** On 0.2 mmol scale. Purification by silica gel chromatography (petroleum: ethyl acetate = 2: 1).

White solid (16.9 mg, 41% yield).

$^1\text{H}$  NMR (600 MHz, Chloroform-*d*)  $\delta$  8.54 (ddd,  $J = 5.0, 1.8, 0.9$  Hz, 1H), 7.91 – 7.86 (m, 1H), 7.69 – 7.63 (m, 1H), 7.26 (ddd,  $J = 7.5, 4.9, 1.2$  Hz, 1H), 5.05 (s, 1H), 3.45 (d,  $J = 18.2$  Hz, 1H), 3.34 (d,  $J = 18.2$  Hz, 1H), 2.05 – 1.88 (m, 2H), 1.67 – 1.46 (m, 2H), 0.98 (t,  $J = 7.4$  Hz, 3H);

$^{13}\text{C}$  NMR (151 MHz, Chloroform-*d*)  $\delta$  158.6, 149.1, 149.0, 136.6, 124.4, 121.6, 110.0, 43.8, 40.3, 18.1, 14.2;

**HRMS** (ESI): Calcd for  $\text{C}_{11}\text{H}_{15}\text{N}_2\text{O}_2$   $[\text{M}+\text{H}]^+$ : 207.1128; found 207.1122.

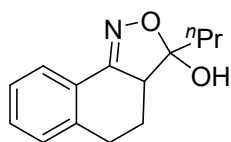

**19**

**3-propyl-3,3a,4,5-tetrahydronaphtho[1,2-c]isoxazol-3-ol (19).** On 0.2 mmol scale. Purification by silica gel chromatography (petroleum: ethyl acetate = 4: 1).

White solid (32.8 mg, 71% yield).

$^1\text{H}$  NMR (600 MHz, Chloroform-*d*)  $\delta$  7.94 (dd,  $J = 7.8, 1.3$  Hz, 1H), 7.33 – 7.27 (m, 1H), 7.21 (t,  $J = 7.5$  Hz, 1H), 7.18 (d,  $J = 7.7$  Hz, 1H), 3.39 (s, 1H), 3.10 (dd,  $J = 13.4, 5.1$  Hz, 1H), 2.96 (ddd,  $J = 16.6, 4.8, 2.4$  Hz, 1H), 2.88 (ddd,  $J = 16.8, 12.8, 4.9$  Hz, 1H), 2.11 – 2.04 (m, 1H), 2.06 – 1.98 (m, 1H), 1.98 – 1.93 (m, 2H), 1.63 – 1.50 (m, 2H), 0.99 (t,  $J = 7.4$  Hz, 3H);

$^{13}\text{C}$  NMR (151 MHz, Chloroform-*d*)  $\delta$  158.1, 139.1, 130.5, 128.9, 126.7, 125.7, 125.3, 107.9, 52.6, 40.2, 29.7, 22.2, 17.6, 14.3;

**HRMS** (ESI): Calcd for  $\text{C}_{14}\text{H}_{18}\text{NO}_2$   $[\text{M}+\text{H}]^+$ : 232.1332; found 232.1330.

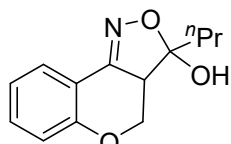

**20**

**3-propyl-3a,4-dihydro-3H-chromeno[4,3-c]isoxazol-3-ol (20).**<sup>8</sup> On 0.2 mmol scale. Purification by silica gel chromatography (petroleum: ethyl acetate = 5: 1).

White solid (35.4 mg, 76% yield).

$^1\text{H}$  NMR (600 MHz, Chloroform-*d*)  $\delta$  7.86 (td,  $J = 7.4, 6.8, 1.8$  Hz, 0.30H), 7.80 (dd,  $J = 7.8, 1.7$  Hz, 0.68H), 7.47 (tdd,  $J = 8.8, 7.1, 1.8$  Hz, 0.30H), 7.35 – 7.29 (m, 0.71H), 7.04 – 6.91 (m, 2H), 4.61 – 4.56 (m, 0.38H), 4.53 (dt,  $J = 10.9, 5.8$  Hz, 0.72H), 4.34 (t,  $J = 11.3$  Hz, 0.32H), 4.28 (dd,  $J = 13.0, 10.9$  Hz, 0.70H), 4.02 (td,  $J = 8.1, 7.6, 3.2$  Hz, 0.19H), 3.94 – 3.85 (m, 0.63H), 3.55 (s, 0.16H), 3.41 (dd,  $J = 12.9, 6.0$  Hz, 0.69H),

2.86 (ddd,  $J = 11.5, 6.7, 5.2$  Hz, 0.16H), 2.81 (ddd,  $J = 8.8, 6.8, 4.3$  Hz, 0.16H), 2.70 (s, 0.15H), 2.04 – 1.92 (m, 1.52H), 1.64 – 1.42 (m, 2.52H), 1.00 (t,  $J = 7.4$  Hz, 2.06H), 0.97 – 0.91 (m, 1.07H);

$^{13}\text{C}$  NMR (151 MHz, Chloroform-*d*)  $\delta$  161.9, 161.8, 155.8, 153.3, 136.4, 136.2, 132.5, 127.3, 127.2, 125.5, 121.7, 121.5, 121.4, 121.2, 120.9, 117.9, 117.8, 117.5, 113.7, 108.3, 69.5, 68.4, 67.6, 67.4, 66.4, 50.9, 50.6, 49.8, 40.2, 36.3, 36.1, 19.3, 18.4, 17.8, 14.2, 14.0, 13.9;

HRMS (ESI): Calcd for  $\text{C}_{13}\text{H}_{16}\text{NO}_3$   $[\text{M}+\text{H}]^+$ : 234.1125; found 234.1120.

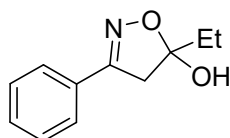

21

**5-ethyl-3-phenyl-4,5-dihydroisoxazol-5-ol (21).** On 0.2 mmol scale. Purification by silica gel chromatography (petroleum: ethyl acetate = 4: 1).

White solid (34.1 mg, 89% yield).

$^1\text{H}$  NMR (600 MHz, Chloroform-*d*)  $\delta$  7.65 – 7.60 (m, 2H), 7.40 – 7.34 (m, 3H), 3.92 (br, 1H), 3.23 (d,  $J = 3.7$  Hz, 2H), 2.04 – 1.92 (m, 2H), 1.05 (t,  $J = 7.4$  Hz, 3H);

$^{13}\text{C}$  NMR (151 MHz, Chloroform-*d*)  $\delta$  157.4, 130.2, 129.6, 128.7, 126.7, 109.5, 43.9, 31.3, 9.0;

HRMS (ESI): Calcd for  $\text{C}_{11}\text{H}_{14}\text{NO}_2$   $[\text{M}+\text{H}]^+$ : 192.1019; found 192.1022.

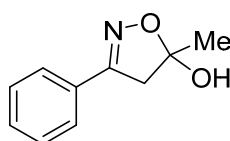

22

**5-methyl-3-phenyl-4,5-dihydroisoxazol-5-ol (22).**<sup>9</sup> On 0.2 mmol scale. Purification by silica gel chromatography (petroleum: ethyl acetate = 5: 1).

White solid (30.5 mg, 86% yield).

$^1\text{H}$  NMR (600 MHz, Chloroform-*d*)  $\delta$  7.65 – 7.59 (m, 2H), 7.44 – 7.35 (m, 3H), 3.92 (br, 1H), 3.35 (d,  $J = 17.3$  Hz, 1H), 3.22 (d,  $J = 17.3$  Hz, 1H), 1.76 (s, 3H);

$^{13}\text{C}$  NMR (151 MHz, Chloroform-*d*)  $\delta$  157.8, 130.3, 129.5, 128.7, 126.7, 107.0, 46.3, 25.3;

HRMS (ESI): Calcd for  $\text{C}_{10}\text{H}_{12}\text{NO}_2$   $[\text{M}+\text{H}]^+$ : 178.0863; found 178.0866.

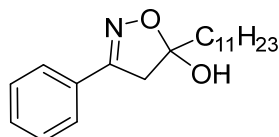

23

**3-phenyl-5-undecyl-4,5-dihydroisoxazol-5-ol (23).** On 0.2 mmol scale. Purification by silica gel chromatography (petroleum: ethyl acetate = 6: 1).

Colorless oil (45.6 mg, 72% yield).

$^1\text{H}$  NMR (600 MHz, Chloroform-*d*)  $\delta$  7.68 – 7.64 (m, 2H), 7.42 – 7.36 (m, 3H), 3.26 (s, 2H), 3.23 (br, 1H), 2.03 – 1.90 (m, 2H), 1.57 – 1.43 (m, 2H), 1.39 – 1.22 (m, 18H),

0.88 (t,  $J = 7.0$  Hz, 3H);

$^{13}\text{C}$  NMR (151 MHz, Chloroform-*d*)  $\delta$  157.4, 130.3, 129.6, 128.7, 126.7, 108.9, 44.4, 38.4, 31.9, 29.7, 29.6, 29.6, 29.5, 29.5, 29.4, 24.8, 22.7, 14.1;

**HRMS** (ESI): Calcd for  $\text{C}_{20}\text{H}_{32}\text{NO}_2$   $[\text{M}+\text{H}]^+$ : 318.2428; found 318.2431.

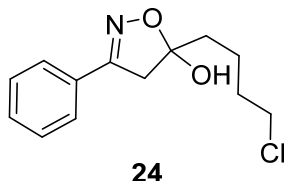

**5-(4-chlorobutyl)-3-phenyl-4,5-dihydroisoxazol-5-ol (24)**. On 0.2 mmol scale. Purification by silica gel chromatography (petroleum: ethyl acetate = 6: 1).

Colorless oil (33.4 mg, 66% yield).

$^1\text{H}$  NMR (600 MHz, Chloroform-*d*)  $\delta$  7.62 (dd,  $J = 7.9, 1.8$  Hz, 2H), 7.42 – 7.36 (m, 3H), 3.97 (s, 1H), 3.54 (t,  $J = 6.5$  Hz, 2H), 3.32 – 3.21 (m, 2H), 1.97 (dddd,  $J = 34.6, 13.9, 10.9, 5.5$  Hz, 2H), 1.86 – 1.80 (m, 2H), 1.72 – 1.58 (m, 2H);

$^{13}\text{C}$  NMR (151 MHz, Chloroform-*d*)  $\delta$  157.5, 130.4, 129.4, 128.8, 126.7, 108.7, 44.8, 44.6, 37.4, 32.3, 22.1;

**HRMS** (ESI): Calcd for  $\text{C}_{13}\text{H}_{17}\text{ClNO}_2$   $[\text{M}+\text{H}]^+$ : 254.0942; found 254.0945.

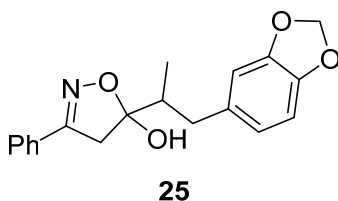

**5-(1-(benzo[d][1,3]dioxol-5-yl)propan-2-yl)-3-phenyl-4,5-dihydroisoxazol-5-ol (25)**. On 0.2 mmol scale. Purification by silica gel chromatography (petroleum: ethyl acetate = 3: 1).

White solid (42.5 mg, 65% yield).

$^1\text{H}$  NMR (600 MHz, Chloroform-*d*)  $\delta$  7.65 (ddt,  $J = 8.1, 6.1, 1.9$  Hz, 2H), 7.42 – 7.36 (m, 3H), 6.74 – 6.68 (m, 2H), 6.64 (ddd,  $J = 14.3, 7.8, 1.7$  Hz, 1H), 5.92 (q,  $J = 1.6$  Hz, 2H), 3.47 (br, 1H), 3.30 – 3.18 (m, 2H), 3.15 (dd,  $J = 13.2, 3.1$  Hz, 0.5H), 2.96 (dd,  $J = 12.8, 3.3$  Hz, 0.5H), 2.31 (ddd,  $J = 27.3, 13.1, 10.5$  Hz, 1H), 2.27 – 2.20 (m, 1H), 1.03 (d,  $J = 6.4$  Hz, 1.5H), 0.95 (d,  $J = 6.8$  Hz, 1.5H);

$^{13}\text{C}$  NMR (151 MHz, Chloroform-*d*)  $\delta$  157.3, 147.6, 133.9, 130.3, 129.5, 128.8, 126.7, 122.2, 1110.0, 110.8, 109.6, 109.5, 108.2, 100.9, 43.3, 43.2, 43.2, 43.1, 38.4, 37.3, 14.7, 14.2;

**HRMS** (ESI): Calcd for  $\text{C}_{19}\text{H}_{20}\text{NO}_4$   $[\text{M}+\text{H}]^+$ : 326.1387; found 326.1388.

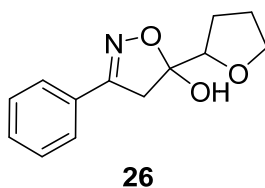

**3-phenyl-5-(tetrahydrofuran-2-yl)-4,5-dihydroisoxazol-5-ol (26)**. On 0.2 mmol scale. Purification by silica gel chromatography (petroleum: ethyl acetate = 3: 1).

White solid (33.6 mg, 71% yield).

$^1\text{H}$  NMR (600 MHz, Chloroform-*d*)  $\delta$  7.58 – 7.53 (m, 2H), 7.35 – 7.28 (m, 3H), 4.31 – 3.86 (m, 2H), 3.79 – 3.58 (m, 2H), 3.35 – 3.26 (m, 0.5H), 3.23 – 3.18 (m, 1H), 3.18 – 3.11 (m, 0.5H), 2.83 – 2.72 (m, 1H), 2.12 – 2.00 (m, 1H), 1.83 – 1.71 (m, 1H);

$^{13}\text{C}$  NMR (151 MHz, Chloroform-*d*)  $\delta$  157.4, 157.3, 130.4, 129.3, 129.3, 128.8, 126.7, 126.7, 109.8, 69.8, 69.4, 68.5, 68.2, 46.3, 46.1, 43.6, 43.3, 28.6, 28.1;

HRMS (ESI): Calcd for  $\text{C}_{13}\text{H}_{16}\text{NO}_3$   $[\text{M}+\text{H}]^+$ : 234.1125; found 234.1121.

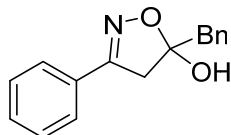

**27**

**5-benzyl-3-phenyl-4,5-dihydroisoxazol-5-ol (27).** On 0.2 mmol scale. Purification by silica gel chromatography (petroleum: ethyl acetate = 5: 1).

White solid (43.5 mg, 86% yield).

$^1\text{H}$  NMR (600 MHz, Chloroform-*d*)  $\delta$  7.56 – 7.50 (m, 2H), 7.30 (td,  $J$  = 6.8, 3.7 Hz, 4H), 7.28 – 7.24 (m, 2H), 7.22 – 7.17 (m, 2H), 3.28 – 3.21 (m, 2H), 3.20 – 3.15 (m, 2H);

$^{13}\text{C}$  NMR (151 MHz, Chloroform-*d*)  $\delta$  157.6, 135.1, 130.5, 130.3, 129.4, 128.7, 128.7, 127.4, 126.7, 108.0, 44.6, 44.3;

HRMS (ESI): Calcd for  $\text{C}_{16}\text{H}_{15}\text{NNaO}_2$   $[\text{M}+\text{Na}]^+$ : 276.0995; found 276.0998.

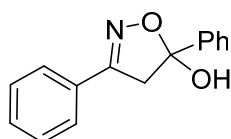

**28**

**3,5-diphenyl-4,5-dihydroisoxazol-5-ol (28).**<sup>9</sup> On 0.2 mmol scale. Purification by silica gel chromatography (petroleum: ethyl acetate = 4: 1).

White solid (42.3 mg, 88% yield).

$^1\text{H}$  NMR (600 MHz, Chloroform-*d*)  $\delta$  7.71 – 7.67 (m, 2H), 7.67 – 7.64 (m, 2H), 7.45 – 7.37 (m, 6H), 3.68 (d,  $J$  = 17.4 Hz, 1H), 3.49 (dd,  $J$  = 17.4, 1.1 Hz, 1H), 3.30 (s, 1H);

$^{13}\text{C}$  NMR (151 MHz, Chloroform-*d*)  $\delta$  157.5, 140.7, 130.5, 129.3, 129.0, 128.8, 128.6, 126.8, 125.6, 107.7, 49.0;

HRMS (ESI): Calcd for  $\text{C}_{15}\text{H}_{14}\text{NO}_2$   $[\text{M}+\text{H}]^+$ : 240.1019; found 240.1015.

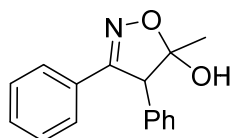

**29**

**5-methyl-3,4-diphenyl-4,5-dihydroisoxazol-5-ol (29).** On 0.2 mmol scale. Purification by silica gel chromatography (petroleum: ethyl acetate = 4: 1).

White solid (45.1 mg, 89% yield).

$^1\text{H}$  NMR (600 MHz, Chloroform-*d*)  $\delta$  7.63 – 7.60 (m, 1.71H), 7.52 – 7.49 (m, 0.28H), 7.38 – 7.26 (m, 6.11H), 7.21 – 7.13 (m, 1.86H), 4.52 (s, 0.86H), 4.46 (s, 0.14H), 3.40

(s, 0.83H), 2.72 (s, 0.13H), 1.77 (s, 0.42H), 1.27 (s, 2.59H);  
 $^{13}\text{C}$  NMR (151 MHz, Chloroform-*d*)  $\delta$  160.7, 134.7, 132.3, 130.2, 130.0, 129.4, 129.2,  
129.2, 128.9, 128.6, 128.6, 128.1, 127.4, 127.1, 109.4, 108.7, 63.1, 60.8, 26.2, 22.1;  
**HRMS** (ESI): Calcd for  $\text{C}_{16}\text{H}_{16}\text{NO}_2$   $[\text{M}+\text{H}]^+$ : 254.1176; found 254.1172.

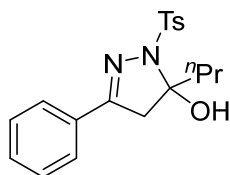

**30**

**3-phenyl-5-propyl-1-tosyl-4,5-dihydro-1H-pyrazol-5-ol (30).** On 0.2 mmol scale.  
Purification by silica gel chromatography (petroleum: ethyl acetate = 3: 1).  
White solid (55.2 mg, 77% yield).

$^1\text{H}$  NMR (600 MHz, Chloroform-*d*)  $\delta$  7.93 – 7.88 (m, 2H), 7.63 – 7.58 (m, 2H), 7.37 –  
7.31 (m, 3H), 7.27 – 7.22 (m, 2H), 3.27 – 3.13 (m, 2H), 2.37 – 2.31 (m, 4H), 2.21 (ddd,  
 $J$  = 14.0, 11.8, 4.9 Hz, 1H), 1.54 – 1.43 (m, 2H), 0.99 (t,  $J$  = 7.3 Hz, 3H);  
 $^{13}\text{C}$  NMR (151 MHz, Chloroform-*d*)  $\delta$  153.4, 143.8, 136.6, 131.1, 130.2, 129.3, 128.6,  
128.3, 126.5, 98.5, 45.6, 43.1, 21.6, 18.7, 14.0.;  
**HRMS** (ESI): Calcd for  $\text{C}_{19}\text{H}_{23}\text{N}_2\text{O}_3\text{S}$   $[\text{M}+\text{H}]^+$ : 359.1424; found 359.1426.

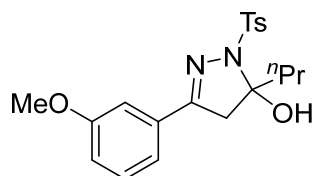

**31**

**3-(3-methoxyphenyl)-5-propyl-1-tosyl-4,5-dihydro-1H-pyrazol-5-ol (31).** On 0.2  
mmol scale. Purification by silica gel chromatography (petroleum: ethyl acetate = 2: 1).  
White solid (53.2 mg, 69% yield).

$^1\text{H}$  NMR (600 MHz, Chloroform-*d*)  $\delta$  7.90 (d,  $J$  = 8.4 Hz, 2H), 7.29 – 7.23 (m, 3H),  
7.20 (dd,  $J$  = 2.6, 1.5 Hz, 1H), 7.15 (dt,  $J$  = 7.8, 1.2 Hz, 1H), 6.91 (ddd,  $J$  = 8.2, 2.6, 0.9  
Hz, 1H), 3.81 (s, 3H), 3.23 – 3.14 (m, 2H), 2.37 (s, 3H), 2.26 (dd,  $J$  = 31.8, 15.1 Hz,  
2H), 1.53 – 1.44 (m, 2H), 1.00 (t,  $J$  = 7.4 Hz, 3H);  
 $^{13}\text{C}$  NMR (151 MHz, Chloroform-*d*)  $\delta$  159.6, 153.2, 143.9, 136.5, 132.4, 129.6, 129.3,  
128.2, 119.2, 116.2, 111.5, 98.5, 55.4, 45.6, 43.2, 21.6, 18.7, 14.0.;  
**HRMS** (ESI): Calcd for  $\text{C}_{20}\text{H}_{25}\text{N}_2\text{O}_4\text{S}$   $[\text{M}+\text{H}]^+$ : 389.1530; found 389.1530.

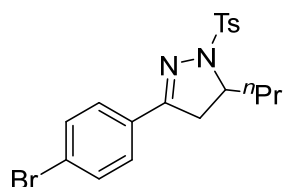

**32**

**3-(2-fluorophenyl)-5-propyl-4,5-dihydroisoxazol-5-ol (32).** On 0.2 mmol scale.  
Purification by silica gel chromatography (petroleum: ethyl acetate = 4: 1).  
White solid (72.1 mg, 86% yield).

$^1\text{H}$  NMR (600 MHz, DMSO- $d_6$ )  $\delta$  7.86 (d,  $J$  = 8.3 Hz, 2H), 7.64 – 7.61 (m, 2H), 7.59 (d,  $J$  = 8.6 Hz, 2H), 7.34 (d,  $J$  = 8.2 Hz, 2H), 6.64 (s, 1H), 3.33 (d,  $J$  = 17.8 Hz, 1H), 3.04 (d,  $J$  = 17.9 Hz, 1H), 2.34 (s, 3H), 2.28 (ddd,  $J$  = 13.5, 11.5, 4.9 Hz, 1H), 2.07 (ddd,  $J$  = 13.5, 11.5, 5.1 Hz, 1H), 1.50 – 1.36 (m, 2H), 0.95 (t,  $J$  = 7.3 Hz, 3H);

$^{13}\text{C}$  NMR (151 MHz, DMSO- $d_6$ )  $\delta$  153.39, 143.65, 137.33, 132.14, 131.04, 129.39, 128.91, 128.74, 123.82, 99.27, 45.74, 41.92, 21.46, 18.89, 14.56;

**HRMS** (ESI): Calcd for  $\text{C}_{19}\text{H}_{22}\text{BrN}_2\text{O}_2\text{S}$   $[\text{M}+\text{H}]^+$ : 421.0580, 423.0560; found 421.0582, 423.0558.

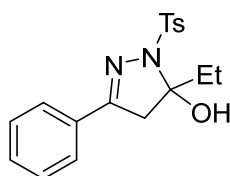

**33**

**5-ethyl-3-phenyl-1-tosyl-4,5-dihydro-1H-pyrazol-5-ol (33).** On 0.2 mmol scale. Purification by silica gel chromatography (petroleum: ethyl acetate = 4: 1).

White solid (50.2 mg, 73% yield).

$^1\text{H}$  NMR (600 MHz, Chloroform- $d$ )  $\delta$  7.93 – 7.90 (m, 2H), 7.65 – 7.62 (m, 2H), 7.39 – 7.35 (m, 3H), 7.28 (d,  $J$  = 8.1 Hz, 2H), 3.29 (s, 1H), 3.27 – 3.14 (m, 2H), 2.43 – 2.33 (m, 4H), 2.34 – 2.24 (m, 1H), 1.06 (t,  $J$  = 7.4 Hz, 3H);

$^{13}\text{C}$  NMR (151 MHz, Chloroform- $d$ )  $\delta$  153.3, 143.9, 136.6, 131.1, 130.2, 129.3, 128.6, 128.2, 126.5, 99.0, 45.0, 34.0, 21.6, 9.6;

**HRMS** (ESI): Calcd for  $\text{C}_{18}\text{H}_{20}\text{N}_2\text{NaO}_3\text{S}$   $[\text{M}+\text{Na}]^+$ : 367.1087; found 367.1088.

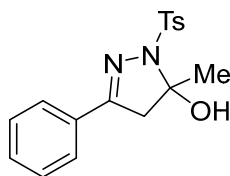

**34**

**5-methyl-3-phenyl-1-tosyl-4,5-dihydro-1H-pyrazol-5-ol (34).** On 0.2 mmol scale. Purification by silica gel chromatography (petroleum: ethyl acetate = 4: 1).

White solid (52.0 mg, 79% yield).

$^1\text{H}$  NMR (600 MHz, Chloroform- $d$ )  $\delta$  7.93 – 7.90 (m, 2H), 7.64 – 7.61 (m, 2H), 7.39 – 7.34 (m, 3H), 7.27 (d,  $J$  = 8.0 Hz, 2H), 3.53 (br, 1H), 3.32 (d,  $J$  = 17.6 Hz, 1H), 3.19 (d,  $J$  = 17.6 Hz, 1H), 2.38 (s, 3H), 2.02 (s, 3H);

$^{13}\text{C}$  NMR (151 MHz, Chloroform- $d$ )  $\delta$  153.4, 143.9, 136.4, 131.0, 130.3, 129.3, 128.6, 128.2, 126.5, 95.7, 48.3, 28.6, 21.6;

**HRMS** (ESI): Calcd for  $\text{C}_{17}\text{H}_{19}\text{N}_2\text{O}_3\text{S}$   $[\text{M}+\text{H}]^+$ : 331.1111; found 331.1113.



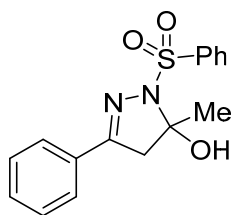

**35**

**5-methyl-3-phenyl-1-(phenylsulfonyl)-4,5-dihydro-1H-pyrazol-5-ol (35).** On 0.2 mmol scale. Purification by silica gel chromatography (petroleum: ethyl acetate = 4: 1). White solid (38.5 mg, 61% yield).

$^1\text{H}$  NMR (600 MHz, Chloroform-*d*)  $\delta$  8.06 – 8.02 (m, 2H), 7.64 – 7.60 (m, 2H), 7.57 – 7.53 (m, 1H), 7.49 (dd,  $J$  = 8.4, 7.0 Hz, 2H), 7.40 – 7.34 (m, 3H), 3.61 – 3.54 (m, 1H), 3.33 (d,  $J$  = 17.6 Hz, 1H), 3.20 (d,  $J$  = 17.6 Hz, 1H), 2.03 (s, 3H);

$^{13}\text{C}$  NMR (151 MHz, Chloroform-*d*)  $\delta$  153.6, 139.4, 133.0, 130.9, 130.4, 128.7, 128.6, 128.2, 126.5, 95.7, 48.3, 28.6;

**HRMS** (ESI): Calcd for  $\text{C}_{16}\text{H}_{17}\text{N}_2\text{O}_3\text{S}$   $[\text{M}+\text{H}]^+$ : 317.0954; found 317.0950.

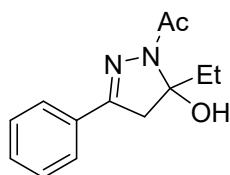

**36**

**1-(5-ethyl-5-hydroxy-3-phenyl-4,5-dihydro-1H-pyrazol-1-yl)ethan-1-one (36).** On 0.2 mmol scale. Purification by silica gel chromatography (petroleum: ethyl acetate = 4: 1).

White solid (37.7 mg, 81% yield).

$^1\text{H}$  NMR (600 MHz, Chloroform-*d*)  $\delta$  7.68 – 7.58 (m, 2H), 7.38 – 7.31 (m, 3H), 4.57 (s, 1H), 3.25 (d,  $J$  = 18.1 Hz, 1H), 3.17 (d,  $J$  = 18.1 Hz, 1H), 2.31 (s, 3H), 2.25 – 2.08 (m, 2H), 0.86 (t,  $J$  = 7.5 Hz, 3H);

$^{13}\text{C}$  NMR (151 MHz, Chloroform-*d*)  $\delta$  171.3, 152.9, 131.4, 130.3, 128.7, 126.4, 95.2, 44.6, 32.1, 22.5, 8.7;

**HRMS** (ESI): Calcd for  $\text{C}_{13}\text{H}_{17}\text{N}_2\text{O}_2$   $[\text{M}+\text{H}]^+$ : 233.1285; found 233.1287.

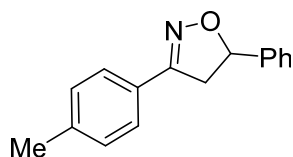

**39**

**3-(4-methoxyphenyl)-5-phenyl-4,5-dihydroisoxazole (39).**<sup>10</sup> On 0.2 mmol scale. Purification by silica gel chromatography (petroleum: DCM = 1: 4). White solid (43.2 mg, 91% yield).

$^1\text{H}$  NMR (600 MHz, Chloroform-*d*)  $\delta$  7.57 (d,  $J = 7.7$  Hz, 2H), 7.40 – 7.32 (m, 4H), 7.30 (t,  $J = 7.2$  Hz, 1H), 7.19 (d,  $J = 7.7$  Hz, 2H), 5.69 (t,  $J = 9.6$  Hz, 1H), 3.73 (dd,  $J = 16.5, 10.9$  Hz, 1H), 3.30 (dd,  $J = 16.6, 8.3$  Hz, 1H), 2.36 (s, 3H);

$^{13}\text{C}$  NMR (151 MHz, Chloroform-*d*)  $\delta$  156.1, 141.1, 140.4, 129.5, 128.8, 128.2, 126.8, 126.7, 126.0, 82.5, 43.3, 21.5;

HRMS (ESI): Calcd for  $\text{C}_{16}\text{H}_{15}\text{NNaO}$   $[\text{M}+\text{Na}]^+$ : 260.1046; found 260.1043.

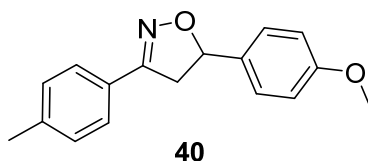

**5-(4-methoxyphenyl)-3-(p-tolyl)-4,5-dihydroisoxazole (40).**<sup>11</sup> On 0.2 mmol scale. Purification by silica gel chromatography (petroleum: DCM = 1: 4).

White solid (49.3 mg, 92% yield).

$^1\text{H}$  NMR (600 MHz, Chloroform-*d*)  $\delta$  7.57 (d,  $J = 8.2$  Hz, 2H), 7.29 (d,  $J = 8.7$  Hz, 2H), 7.19 (d,  $J = 7.9$  Hz, 2H), 6.87 (d,  $J = 8.7$  Hz, 2H), 5.63 (dd,  $J = 10.8, 8.6$  Hz, 1H), 3.77 (s, 3H), 3.67 (dd,  $J = 16.6, 10.8$  Hz, 1H), 3.27 (dd,  $J = 16.6, 8.6$  Hz, 1H), 2.36 (s, 3H);

$^{13}\text{C}$  NMR (151 MHz, Chloroform-*d*)  $\delta$  159.6, 156.3, 140.4, 132.9, 129.5, 127.5, 126.8, 126.7, 114.1, 82.4, 55.3, 43.0, 21.5;

HRMS (ESI): Calcd for  $\text{C}_{17}\text{H}_{18}\text{NO}_2$   $[\text{M}+\text{H}]^+$ : 268.1332; found 268.1330.

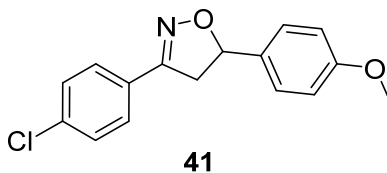

**3-(4-chlorophenyl)-5-(4-methoxyphenyl)-4,5-dihydroisoxazole (41).**<sup>11</sup> On 0.2 mmol scale. Purification by silica gel chromatography (petroleum: DCM = 1: 5).

Pale-yellow solid (46.5 mg, 81% yield).

$^1\text{H}$  NMR (600 MHz, Chloroform-*d*)  $\delta$  7.63 – 7.58 (m, 2H), 7.36 (d,  $J = 8.6$  Hz, 2H), 7.29 (d,  $J = 8.7$  Hz, 2H), 6.89 (d,  $J = 8.7$  Hz, 2H), 5.67 (dd,  $J = 10.9, 8.7$  Hz, 1H), 3.79 (s, 3H), 3.67 (dd,  $J = 16.7, 10.9$  Hz, 1H), 3.27 (dd,  $J = 16.7, 8.7$  Hz, 1H);

$^{13}\text{C}$  NMR (151 MHz, Chloroform-*d*)  $\delta$  159.7, 155.4, 136.0, 132.5, 129.0, 128.2, 128.0, 127.4, 114.2, 82.8, 55.4, 42.7;

HRMS (ESI): Calcd for  $\text{C}_{16}\text{H}_{15}\text{ClNO}_2$   $[\text{M}+\text{H}]^+$ : 288.0786; found 288.0787.

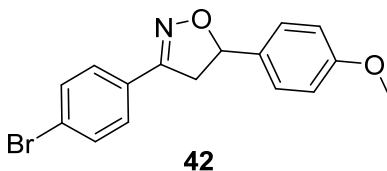

**3-(4-bromophenyl)-5-(4-methoxyphenyl)-4,5-dihydroisoxazole (42).** On 0.2 mmol scale. Purification by silica gel chromatography (petroleum: DCM = 1: 5).

Yellow solid (56.8 mg, 86% yield).

$^1\text{H}$  NMR (600 MHz, Chloroform-*d*)  $\delta$  7.57 – 7.52 (m, 4H), 7.32 – 7.29 (m, 2H), 6.92 – 6.88 (m, 2H), 5.69 (dd,  $J = 10.9, 8.6$  Hz, 1H), 3.80 (s, 3H), 3.69 (dd,  $J = 16.6, 10.9$  Hz,

1H), 3.29 (dd,  $J = 16.7, 8.7$  Hz, 1H);

$^{13}\text{C}$  NMR (151 MHz, Chloroform-*d*)  $\delta$  159.7, 155.5, 132.5, 132.0, 128.6, 128.2, 127.4, 124.4, 114.2, 82.8, 55.4, 42.7;

**HRMS** (ESI): Calcd for  $\text{C}_{16}\text{H}_{15}\text{BrNO}_2$   $[\text{M}+\text{H}]^+$ : 332.0281, 334.0261; found 332.0283, 334.0260.

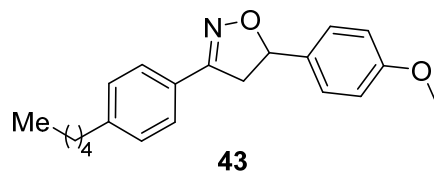

**5-(4-methoxyphenyl)-3-(4-pentylphenyl)-4,5-dihydroisoxazole (43).** On 0.2 mmol scale. Purification by silica gel chromatography (petroleum: DCM = 1: 5).

White solid (59.5 mg, 92% yield).

$^1\text{H}$  NMR (400 MHz,  $\text{CDCl}_3$ )  $\delta$  7.63 (d,  $J = 7.9$  Hz, 2H), 7.34 (d,  $J = 8.2$  Hz, 2H), 7.25 (d,  $J = 7.8$  Hz, 2H), 6.92 (d,  $J = 8.2$  Hz, 2H), 5.69 (dd,  $J = 10.8, 8.5$  Hz, 1H), 3.83 (s, 3H), 3.74 (dd,  $J = 16.6, 10.8$  Hz, 1H), 3.34 (dd,  $J = 16.6, 8.5$  Hz, 1H), 2.65 (t,  $J = 7.7$  Hz, 2H), 1.66 (q,  $J = 7.5$  Hz, 2H), 1.35 (h,  $J = 5.9$  Hz, 4H), 0.96 – 0.86 (m, 3H);

$^{13}\text{C}$  NMR (101 MHz, Chloroform-*d*)  $\delta$  159.6, 156.2, 145.4, 133.0, 128.8, 127.4, 127.0, 126.7, 114.1, 82.3, 55.3, 43.1, 35.8, 31.4, 31.0, 22.5, 14.0.;

**HRMS** (ESI): Calcd for  $\text{C}_{21}\text{H}_{26}\text{NO}_2$   $[\text{M}+\text{H}]^+$ : 324.1958; found 324.1955.

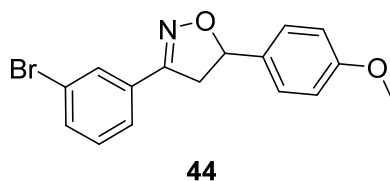

**3-(3-bromophenyl)-5-(4-methoxyphenyl)-4,5-dihydroisoxazole (44).** On 0.2 mmol scale. Purification by silica gel chromatography (petroleum: DCM = 1: 5).

Yellow solid (50.8 mg, 77% yield).

$^1\text{H}$  NMR (600 MHz, Chloroform-*d*)  $\delta$  7.83 (t,  $J = 1.8$  Hz, 1H), 7.61 (ddd,  $J = 7.8, 1.6, 1.0$  Hz, 1H), 7.52 (ddd,  $J = 8.0, 2.0, 1.0$  Hz, 1H), 7.31 – 7.28 (m, 2H), 7.27 (t,  $J = 7.9$  Hz, 1H), 6.91 – 6.87 (m, 2H), 5.69 (dd,  $J = 11.0, 8.6$  Hz, 1H), 3.80 (s, 3H), 3.68 (dd,  $J = 16.7, 11.0$  Hz, 1H), 3.28 (dd,  $J = 16.7, 8.7$  Hz, 1H);

$^{13}\text{C}$  NMR (151 MHz, Chloroform-*d*)  $\delta$  159.7, 155.1, 133.0, 132.4, 131.7, 130.3, 129.6, 127.4, 125.2, 122.9, 114.2, 82.9, 55.4, 42.6.;

**HRMS** (ESI): Calcd for  $\text{C}_{16}\text{H}_{15}\text{BrNO}_2$   $[\text{M}+\text{H}]^+$ : 332.0281, 334.0261; found 332.0283, 334.0268.

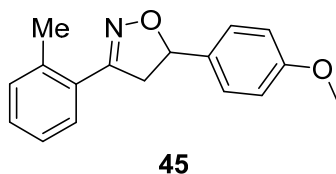

**5-(4-methoxyphenyl)-3-(o-tolyl)-4,5-dihydroisoxazole (45).** On 0.2 mmol scale. Purification by silica gel chromatography (petroleum: ethyl acetate = 3: 1).

White solid (38.1 mg, 71% yield).

$^1\text{H}$  NMR (400 MHz, Chloroform-*d*)  $\delta$  7.36 (d,  $J = 8.0$  Hz, 3H), 7.32 (d,  $J = 5.3$  Hz, 2H), 7.26 (t,  $J = 4.2$  Hz, 1H), 7.01 – 6.90 (m, 2H), 5.67 (dd,  $J = 10.7, 8.4$  Hz, 1H), 3.84 (s, 3H), 3.82 – 3.77 (m, 1H), 3.40 (dd,  $J = 16.6, 8.4$  Hz, 1H), 2.63 (s, 3H);

$^{13}\text{C}$  NMR (101 MHz, Chloroform-*d*)  $\delta$  159.6, 157.1, 138.1, 133.0, 131.6, 129.4, 128.9, 128.7, 127.3, 125.8, 114.2, 81.5, 55.4, 45.5, 23.0;

HRMS (ESI): Calcd for  $\text{C}_{17}\text{H}_{18}\text{NO}_2$   $[\text{M}+\text{H}]^+$ : 268.1332; found 268.1335.

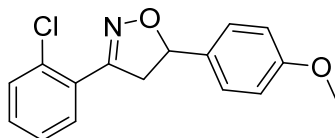

46

**3-(2-chlorophenyl)-5-(4-methoxyphenyl)-4,5-dihydroisoxazole (46).** On 0.2 mmol scale. Purification by silica gel chromatography (petroleum: ethyl acetate = 3: 1).

White solid (41.6 mg, 73% yield).

$^1\text{H}$  NMR (600 MHz, Chloroform-*d*)  $\delta$  7.67 (dd,  $J = 7.6, 1.9$  Hz, 1H), 7.42 (dd,  $J = 7.9, 1.4$  Hz, 1H), 7.36 – 7.32 (m, 3H), 7.30 (td,  $J = 7.5, 1.4$  Hz, 1H), 6.93 – 6.89 (m, 2H), 5.70 (dd,  $J = 10.7, 8.8$  Hz, 1H), 3.85 (dd,  $J = 17.1, 10.7$  Hz, 1H), 3.80 (s, 3H), 3.50 (dd,  $J = 17.1, 8.8$  Hz, 1H);

$^{13}\text{C}$  NMR (151 MHz, Chloroform-*d*)  $\delta$  159.7, 156.3, 132.9, 132.4, 130.9, 130.6, 130.6, 129.1, 127.5, 127.1, 114.2, 83.2, 55.4, 45.2;

HRMS (ESI): Calcd for  $\text{C}_{16}\text{H}_{15}\text{ClNO}_2$   $[\text{M}+\text{H}]^+$ : 288.0786; found 288.0787.

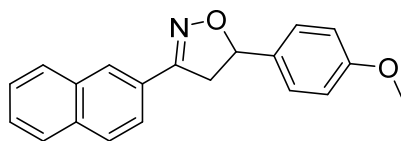

47

**5-(4-methoxyphenyl)-3-(naphthalen-2-yl)-4,5-dihydroisoxazole (34).**<sup>12</sup> On 0.2 mmol scale. Purification by silica gel chromatography (petroleum: DCM = 1: 4).

White solid (50.3 mg, 83% yield).

$^1\text{H}$  NMR (600 MHz, Chloroform-*d*)  $\delta$  7.99 (dd,  $J = 8.7, 1.7$  Hz, 1H), 7.84 (d,  $J = 1.7$  Hz, 1H), 7.81 – 7.78 (m, 3H), 7.49 – 7.44 (m, 2H), 7.31 (d,  $J = 8.7$  Hz, 2H), 6.89 – 6.85 (m, 2H), 5.67 (dd,  $J = 10.8, 8.7$  Hz, 1H), 3.78 – 3.70 (m, 4H), 3.38 (dd,  $J = 16.5, 8.7$  Hz, 1H);

$^{13}\text{C}$  NMR (151 MHz, Chloroform-*d*)  $\delta$  159.7, 156.5, 134.1, 133.1, 132.8, 128.6, 128.4, 127.9, 127.5, 127.3, 127.2, 127.0, 126.8, 123.6, 114.2, 82.8, 55.4, 42.8;

HRMS (ESI): Calcd for  $\text{C}_{20}\text{H}_{18}\text{NO}_2$   $[\text{M}+\text{H}]^+$ : 304.1332; found 304.1335.

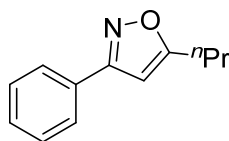

48

**5-methyl-3-phenyl-1-tosyl-4,5-dihydro-1H-pyrazol-5-ol (34).**<sup>13</sup> On 0.2 mmol scale. Purification by silica gel chromatography (petroleum: ethyl acetate = 20: 1).

Yellow solid (0.87g, 93% yield).

$^1\text{H}$  NMR (400 MHz, Chloroform-*d*)  $\delta$  7.82 (d,  $J$  = 6.9 Hz, 2H), 7.46 (d,  $J$  = 6.1 Hz, 3H), 6.32 (s, 1H), 2.80 (t,  $J$  = 7.5 Hz, 2H), 1.81 (q,  $J$  = 7.5 Hz, 2H), 1.05 (t,  $J$  = 7.5 Hz, 3H);  
 $^{13}\text{C}$  NMR (101 MHz, Chloroform-*d*)  $\delta$  174.1, 162.3, 129.8, 129.5, 128.9, 126.8, 98.9, 28.8, 21.0, 13.7;

**HRMS** (ESI): Calcd for  $\text{C}_{12}\text{H}_{14}\text{NO}$   $[\text{M}+\text{H}]^+$ : 188.1070; found 188.1073.

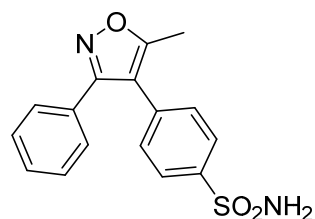

**Valdecoxib**

**4-(5-methyl-3-phenylisoxazol-4-yl)benzenesulfonamide (Valdecoxib).** On 0.2 mmol scale. Purification by silica gel chromatography (petroleum: ethyl acetate = 2: 1).

White solid (1.18 g, 75% yield).

$^1\text{H}$  NMR (600 MHz, DMSO-*d*<sub>6</sub>)  $\delta$  7.89 – 7.83 (m, 2H), 7.48 – 7.40 (m, 7H), 7.36 (dt,  $J$  = 7.0, 1.4 Hz, 2H), 2.48 (s, 3H);

$^{13}\text{C}$  NMR (151 MHz, DMSO-*d*<sub>6</sub>)  $\delta$  168.10, 161.15, 143.74, 133.75, 130.49, 130.25, 129.31, 128.88, 128.67, 126.56, 114.73, 11.86;

**HRMS** (ESI): Calcd for  $\text{C}_{16}\text{H}_{14}\text{N}_2\text{NaO}_3\text{S}$   $[\text{M}+\text{Na}]^+$ : 337.0617 ; found 337.0619.

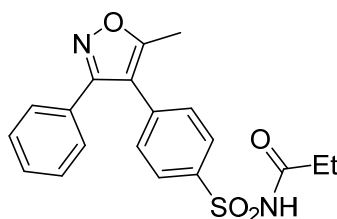

**Parecoxib**

**N-((4-(5-methyl-3-phenylisoxazol-4-yl)phenyl)sulfonyl)propionamide (Parecoxib).** On 0.2 mmol scale. Purification by silica gel chromatography (petroleum: ethyl acetate = 4: 1).

White solid (1.13 g, 87% yield).

$^1\text{H}$  NMR (600 MHz, Chloroform-*d*)  $\delta$  8.57 (br, 1H), 7.99 – 7.94 (m, 2H), 7.37 – 7.25 (m, 7H), 2.43 (d,  $J$  = 1.1 Hz, 3H), 2.31 – 2.19 (m, 2H), 1.08 – 1.00 (m, 3H);

$^{13}\text{C}$  NMR (151 MHz, Chloroform-*d*)  $\delta$  171.9, 167.6, 161.2, 137.8, 136.4, 130.1, 129.9, 128.8, 128.7, 128.5, 128.3, 114.5, 29.6, 11.9, 8.2;

**HRMS** (ESI): Calcd for  $\text{C}_{19}\text{H}_{19}\text{N}_2\text{O}_4\text{S}$   $[\text{M}+\text{H}]^+$ : 371.1060; found 371.1062.

## References

- 1 L. Di Nunno, P. Vitale, A. Scilimati, S. Tacconelli and P. Patrignani, *J. Med. Chem.*, 2004, **47**, 4881-4890.
- 2 J. J. Talley, D. L. Brown, J. S. Carter, M. J. Graneto, C. M. Koboldt, J. L. Masferrer, W. E. Perkins, R. S. Rogers, A. F. Shaffer, Y. Y. Zhang, B. S. Zweifel and K. Seibert, *J.*

- Med. Chem.*, 2000, **43**, 775-777.
- 3 C. W. Downey, M. W. Johnson and K. J. Tracy, *J. Org. Chem.*, 2008, **73**, 3299-3302.
  - 4 P. Ji, J. Park, Y. Gu, D. S. Clark and J. F. Hartwig, *Nature Chemistry*, 2021, **13**, 312-318.
  - 5 P. R. Chopade, T. A. Davis, E. Prasad and R. A. Flowers, *Org. Lett.*, 2004, **6**, 2685-2688.
  - 6 G. S. Lee and S. H. Hong, *Chemical Science*, 2018, **9**, 5810-5815.
  - 7 C.-M. Chu, S. Gao, M. N. V. Sastry, C.-W. Kuo, C. Lu, J.-T. Liu and C.-F. Yao, *Tetrahedron*, 2007, **63**, 1863-1871.
  - 8 L. Di Nunno, A. Scilimati and P. Vitale, *Tetrahedron*, 2002, **58**, 2659-2665.
  - 9 S. Tang, J. He, Y. Sun, L. He and X. She, *J. Org. Chem.*, 2010, **75**, 1961-1966.
  - 10 S. Minakata, S. Okumura, T. Nagamachi and Y. Takeda, *Org. Lett.*, 2011, **13**, 2966-2969.
  - 11 K. Mizuno, N. Ichinose, T. Tamai and Y. Otsuji, *J. Org. Chem.*, 1992, **57**, 4669-4675.
  - 12 K. Khosravi, *Res. Chem. Intermed.*, 2015, **41**, 5253-5260.
  - 13 T. Duraisamy, V. Thavasianandam Seenivasan, L.-Y. Wang, K. Govindan, B. Ganesan, M. Kandasamy, Y.-T. Chiou and W.-Y. Lin, *Asian Journal of Organic Chemistry*, 2025, **14**, e202400359.

### Single Crystal X-ray Diffraction Data

#### X-ray crystallographic data for 28

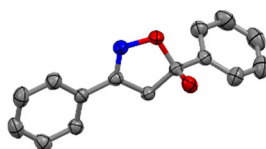

**Table 1 Crystal data and structure refinement for compound 28.**

|                     |                                                 |
|---------------------|-------------------------------------------------|
| Identification code | CCDC2386231                                     |
| Empirical formula   | C <sub>15</sub> H <sub>13</sub> NO <sub>2</sub> |
| Formula weight      | 239.276                                         |
| Temperature/K       | 298.15                                          |
| Crystal system      | monoclinic                                      |
| Space group         | P2 <sub>1</sub> /c                              |
| a/Å                 | 8.8108(2)                                       |
| b/Å                 | 9.98924(19)                                     |
| c/Å                 | 13.7937(3)                                      |

|                                               |                                                               |
|-----------------------------------------------|---------------------------------------------------------------|
| $\alpha/^\circ$                               | 90                                                            |
| $\beta/^\circ$                                | 96.041(2)                                                     |
| $\gamma/^\circ$                               | 90                                                            |
| Volume/ $\text{\AA}^3$                        | 1207.29(5)                                                    |
| Z                                             | 4                                                             |
| $\rho_{\text{calc}}/\text{g/cm}^3$            | 1.316                                                         |
| $\mu/\text{mm}^{-1}$                          | 0.451                                                         |
| F(000)                                        | 505.2                                                         |
| Crystal size/ $\text{mm}^3$                   | $0.2 \times 0.2 \times 0.1$                                   |
| Radiation                                     | synchrotron ( $\lambda = 1.34050$ )                           |
| $2\Theta$ range for data collection/ $^\circ$ | 9.52 to 112.7                                                 |
| Index ranges                                  | $-10 \leq h \leq 10, -12 \leq k \leq 12, -16 \leq l \leq 17$  |
| Reflections collected                         | 13864                                                         |
| Independent reflections                       | 2376 [ $R_{\text{int}} = 0.0308, R_{\text{sigma}} = 0.0181$ ] |
| Data/restraints/parameters                    | 2376/0/164                                                    |
| Goodness-of-fit on $F^2$                      | 1.062                                                         |
| Final R indexes [ $I \geq 2\sigma(I)$ ]       | $R_1 = 0.0465, wR_2 = 0.1182$                                 |
| Final R indexes [all data]                    | $R_1 = 0.0504, wR_2 = 0.1228$                                 |
| Largest diff. peak/hole / $e \text{\AA}^{-3}$ | 0.24/-0.41                                                    |

**Table 2 Fractional Atomic Coordinates ( $\times 10^4$ ) and Equivalent Isotropic Displacement Parameters ( $\text{\AA}^2 \times 10^3$ ) for compound 1.  $U_{\text{eq}}$  is defined as 1/3 of the trace of the orthogonalised  $U_{ij}$  tensor.**

| Atom | $x$        | $y$        | $z$        | $U(\text{eq})$ |
|------|------------|------------|------------|----------------|
| O1   | 4124.8(10) | 3230.1(8)  | 7260.8(6)  | 41.1(2)        |
| O2   | 4640.1(10) | 5255.3(8)  | 6521.5(6)  | 42.6(3)        |
| N2   | 5209.6(11) | 2312.2(10) | 6954.0(7)  | 39.2(3)        |
| C    | 3671.9(13) | 4142.5(11) | 6460.0(8)  | 34.4(3)        |
| C1   | 2011.3(13) | 4497.8(12) | 6506.8(8)  | 36.7(3)        |
| C2   | 5184.4(12) | 2374.6(11) | 6022.7(8)  | 33.7(3)        |
| C3   | 6157.3(13) | 1513.6(11) | 5488.3(8)  | 34.9(3)        |
| C4   | 5922.9(14) | 1456.2(12) | 4477.0(9)  | 39.1(3)        |
| C5   | 4029.3(13) | 3348.0(11) | 5571.5(8)  | 34.7(3)        |
| C6   | 7297.0(15) | 725.0(13)  | 5978.1(10) | 45.1(3)        |
| C7   | 1012.0(16) | 3605.8(14) | 6876.2(11) | 49.7(3)        |
| C8   | 1451.0(16) | 5713.8(13) | 6142.0(10) | 49.9(3)        |
| C9   | 6809.1(15) | 622.3(14)  | 3965.6(10) | 47.6(3)        |
| C10  | 7924.1(16) | -157.8(14) | 4456.2(11) | 52.9(4)        |
| C11  | 8162.9(16) | -108.0(14) | 5463.9(12) | 53.8(4)        |
| C12  | -83.0(19)  | 6026.9(17) | 6156.6(13) | 65.2(5)        |
| C13  | -514.6(18) | 3936.5(18) | 6889.5(13) | 64.1(4)        |

C14 -1058.0(18)

5147(2)

6529.6(12)

67.2(5)

### NMR Spectra

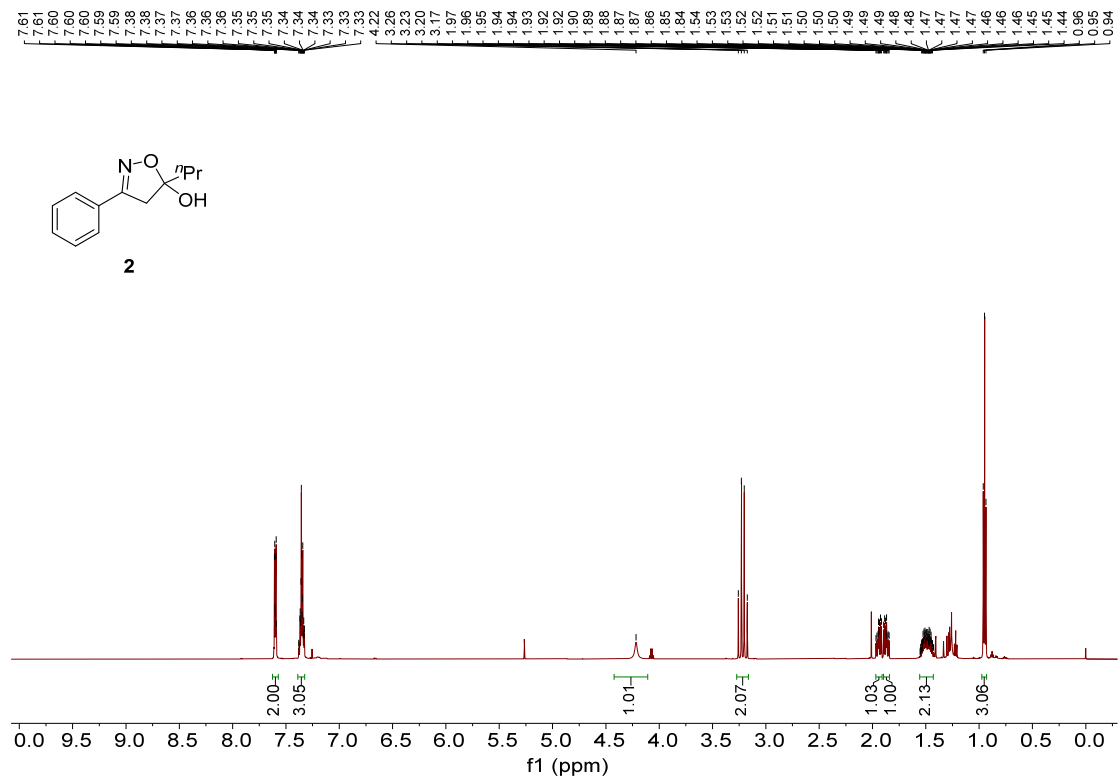



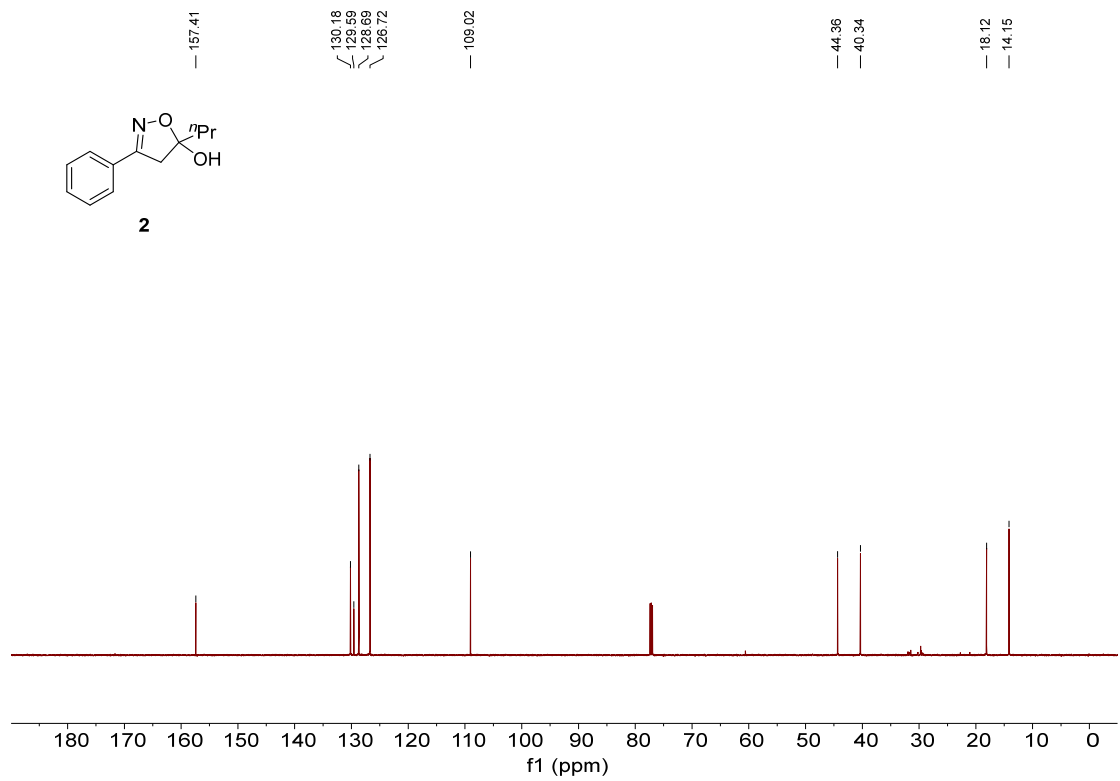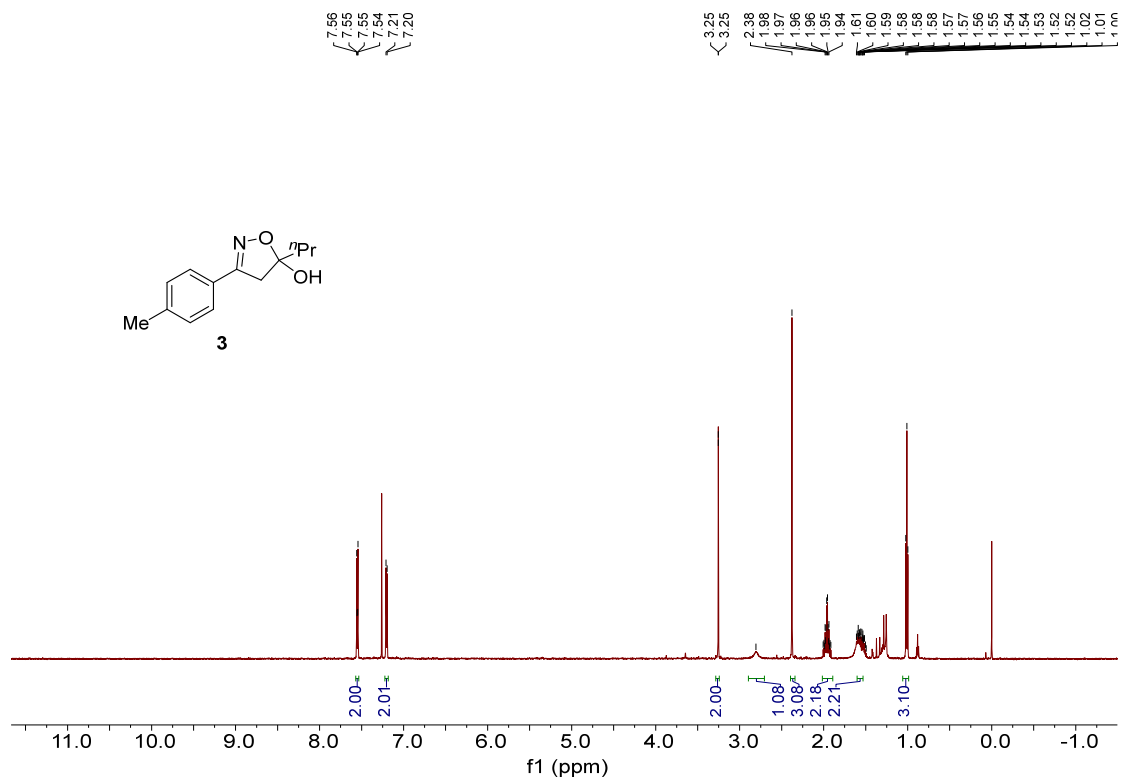

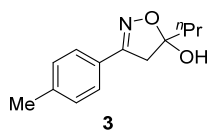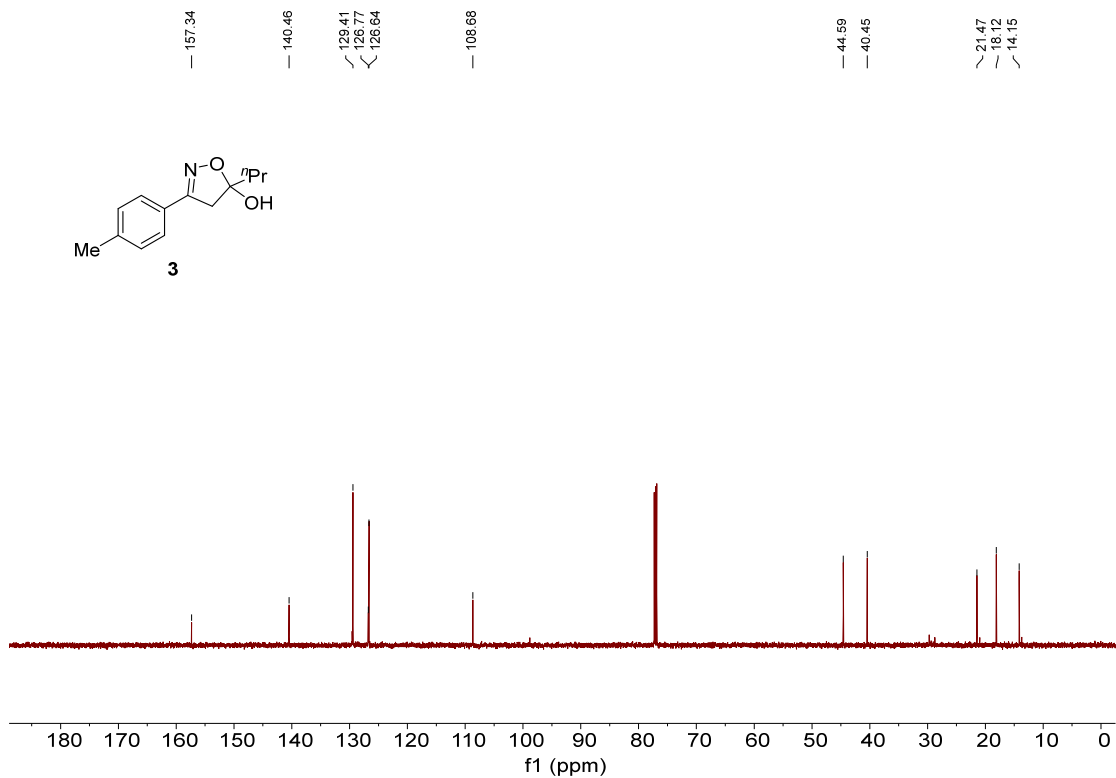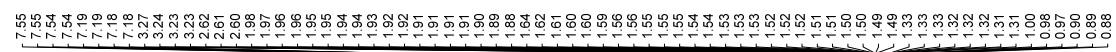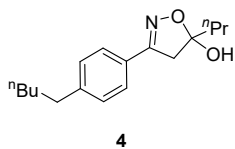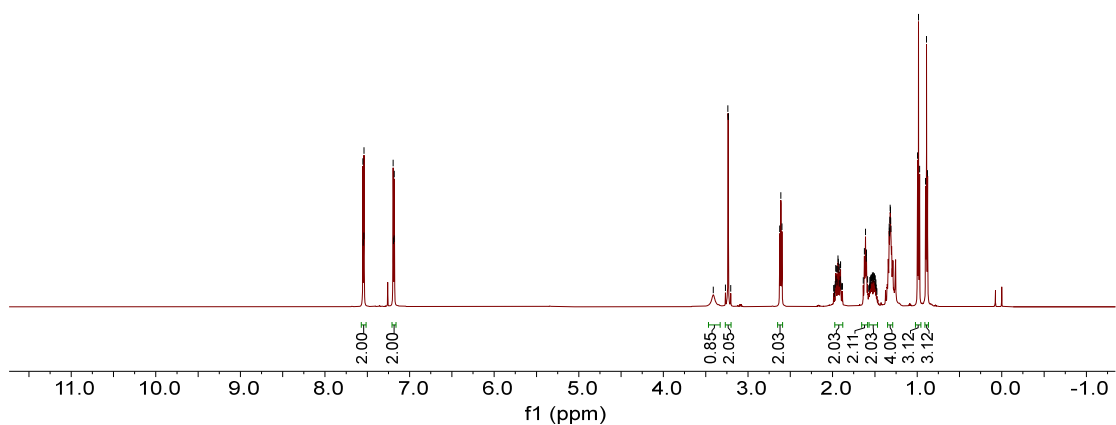

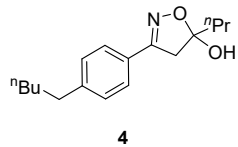

- 157.37  
 - 145.50  
 128.77  
 126.66  
 - 106.69  
 44.59  
 40.44  
 35.83  
 31.44  
 30.94  
 22.53  
 18.11  
 14.15  
 14.03

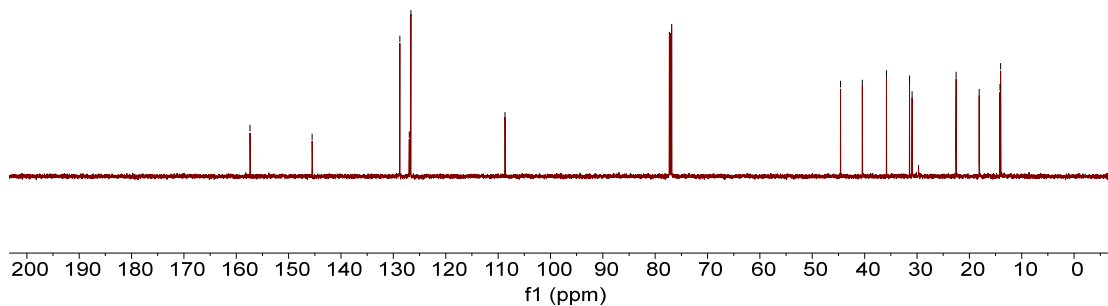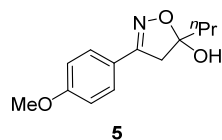

7.58  
 7.56  
 6.90  
 6.88  
 3.83  
 3.45  
 3.45  
 3.22  
 1.99  
 1.98  
 1.97  
 1.96  
 1.96  
 1.95  
 1.95  
 1.94  
 1.94  
 1.93  
 1.82  
 1.82  
 1.82  
 1.81  
 1.81  
 1.80  
 1.89  
 1.88  
 1.59  
 1.58  
 1.57  
 1.57  
 1.56  
 1.56  
 1.55  
 1.55  
 1.55  
 1.54  
 1.54  
 1.54  
 1.53  
 1.53  
 1.52  
 1.52  
 1.51  
 1.51  
 1.51  
 1.50  
 1.50  
 1.49  
 1.49  
 1.48  
 1.48  
 1.00  
 0.99  
 0.99

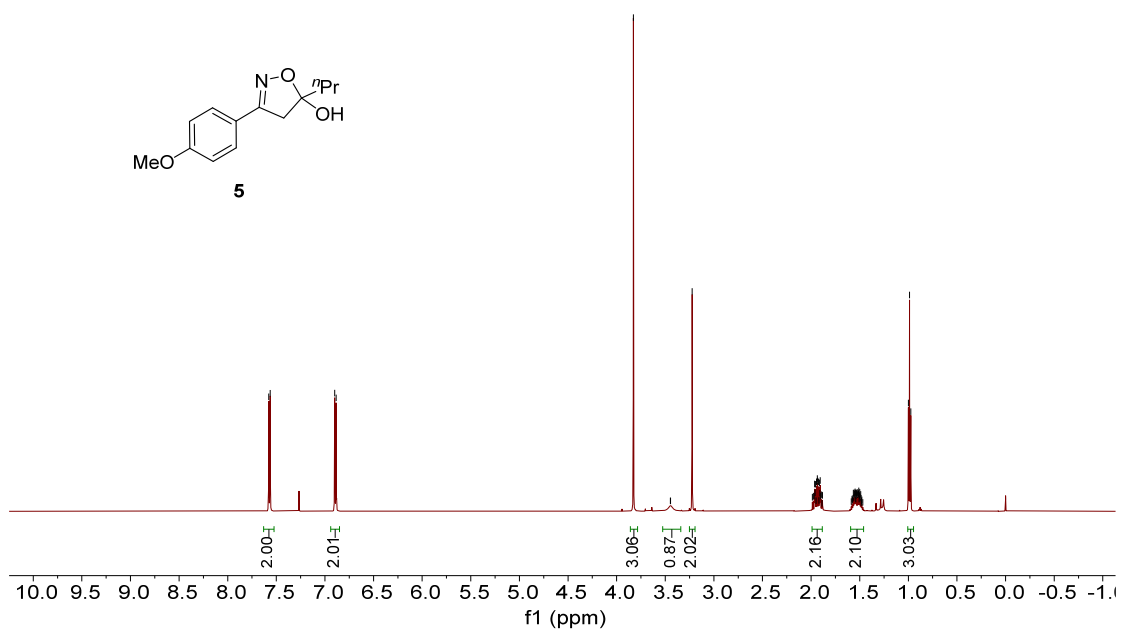

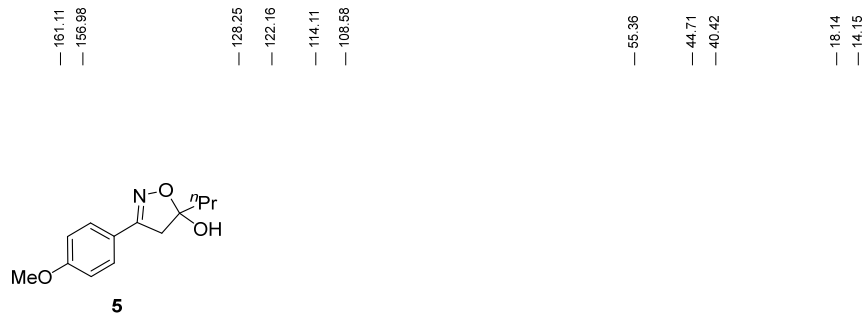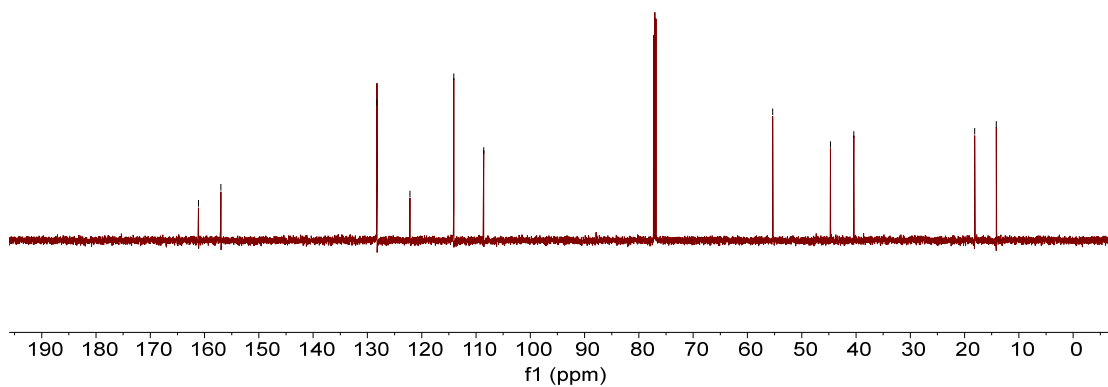

7.64  
 7.64  
 7.63  
 7.62  
 7.09  
 7.08  
 7.06  
 3.23  
 2.00  
 1.99  
 1.98  
 1.98  
 1.97  
 1.96  
 1.95  
 1.94  
 1.93  
 1.93  
 1.92  
 1.92  
 1.91  
 1.90  
 1.89  
 1.58  
 1.58  
 1.57  
 1.56  
 1.56  
 1.55  
 1.55  
 1.54  
 1.54  
 1.54  
 1.53  
 1.53  
 1.52  
 1.52  
 1.51  
 1.51  
 1.50  
 1.50  
 1.49  
 1.48  
 1.48  
 1.01  
 1.00  
 0.99  
 0

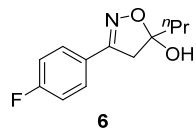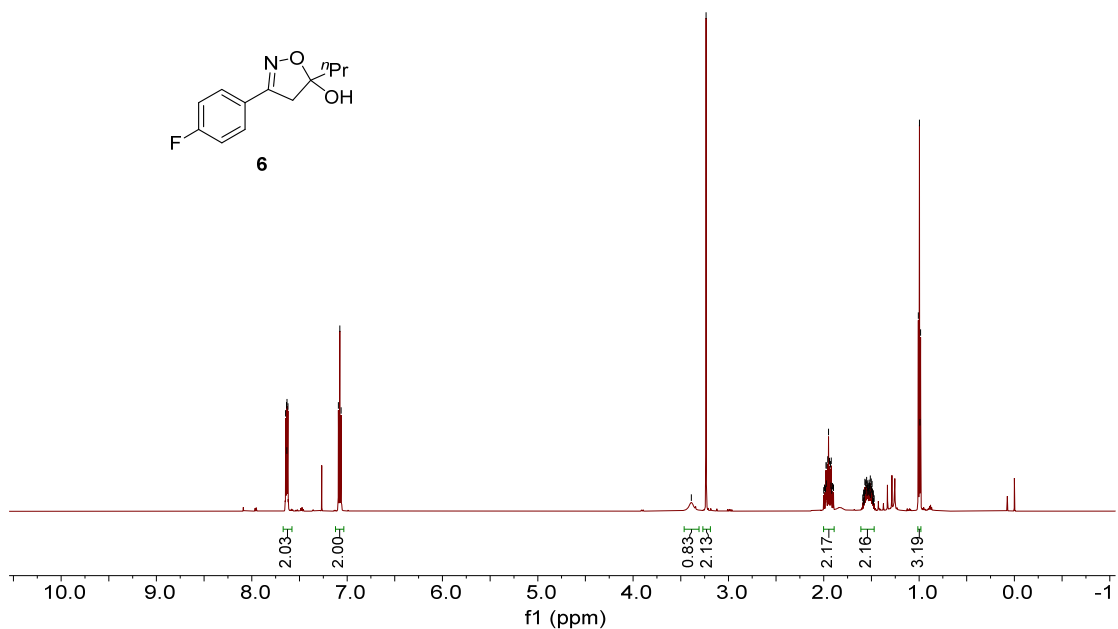

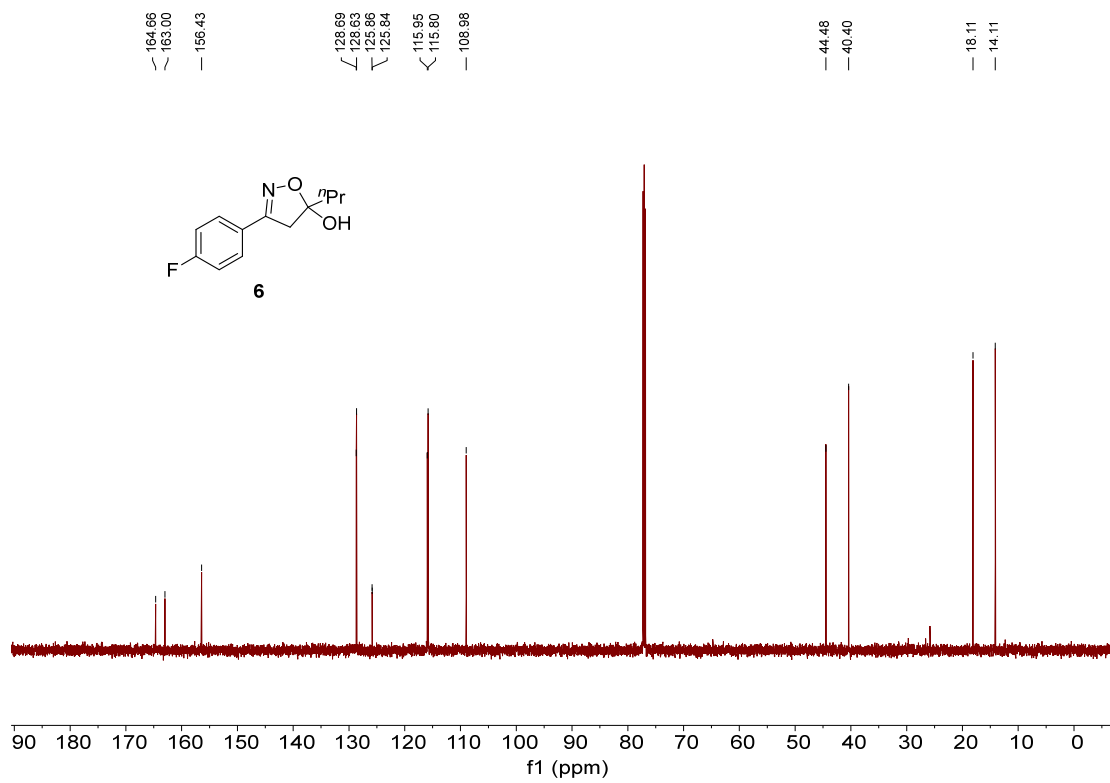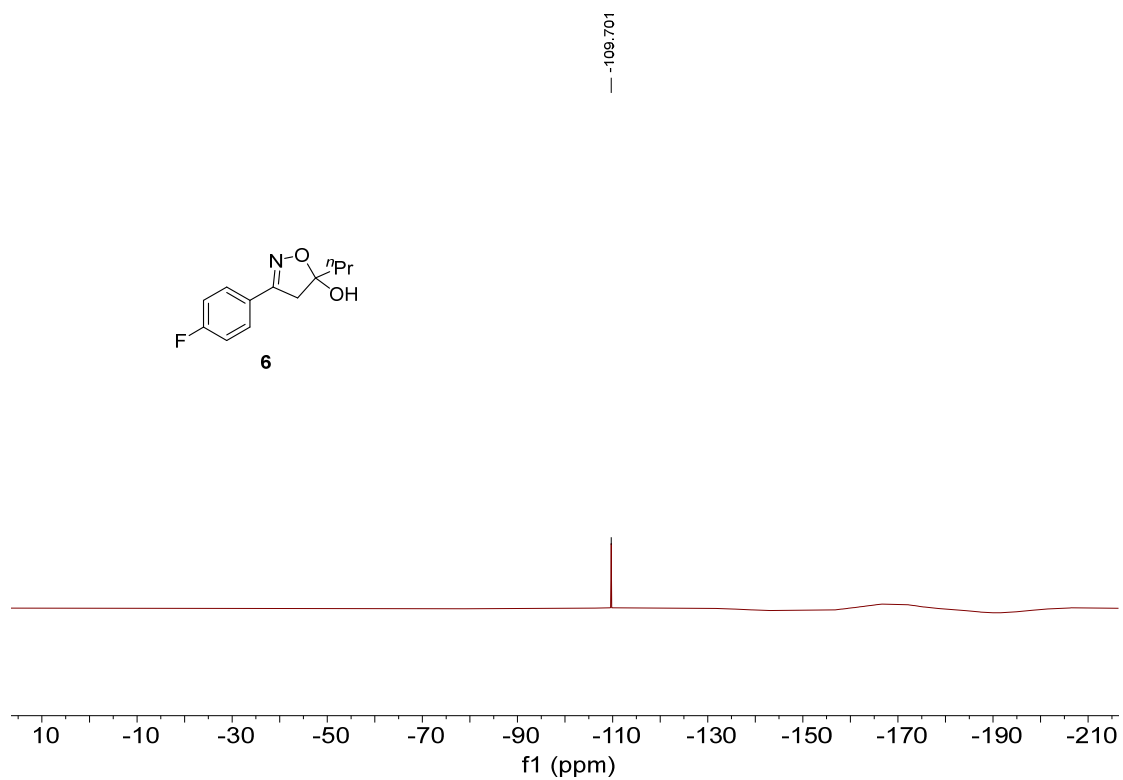

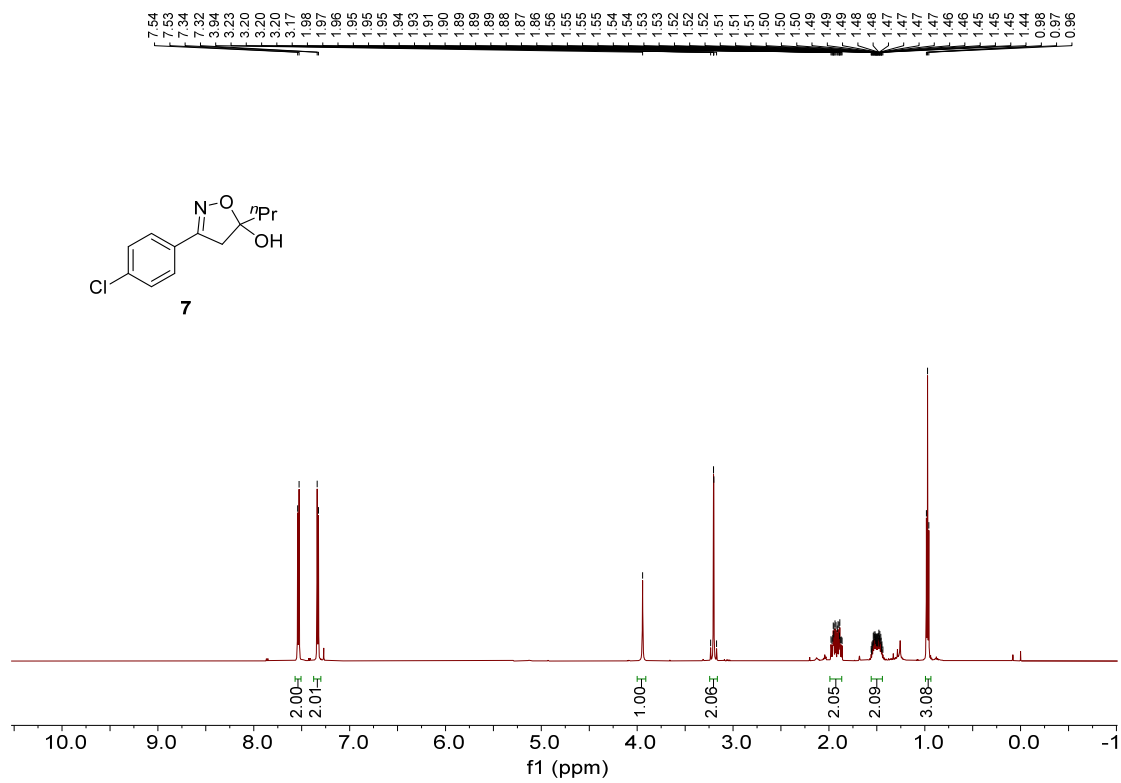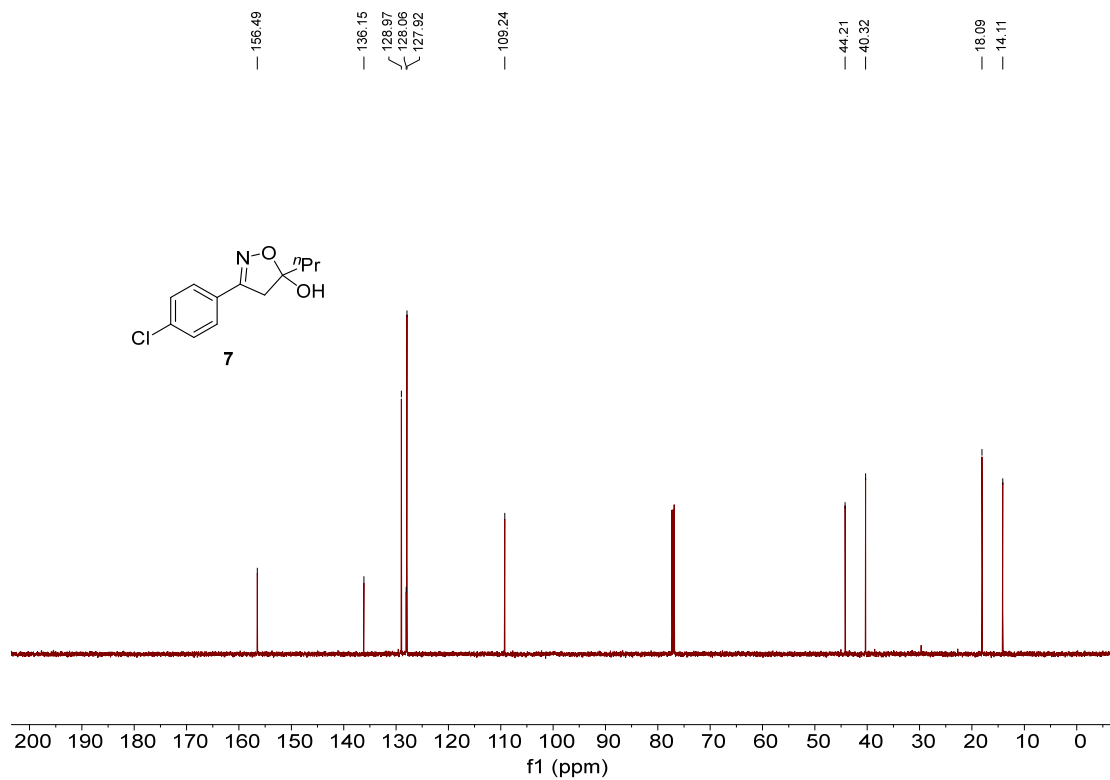

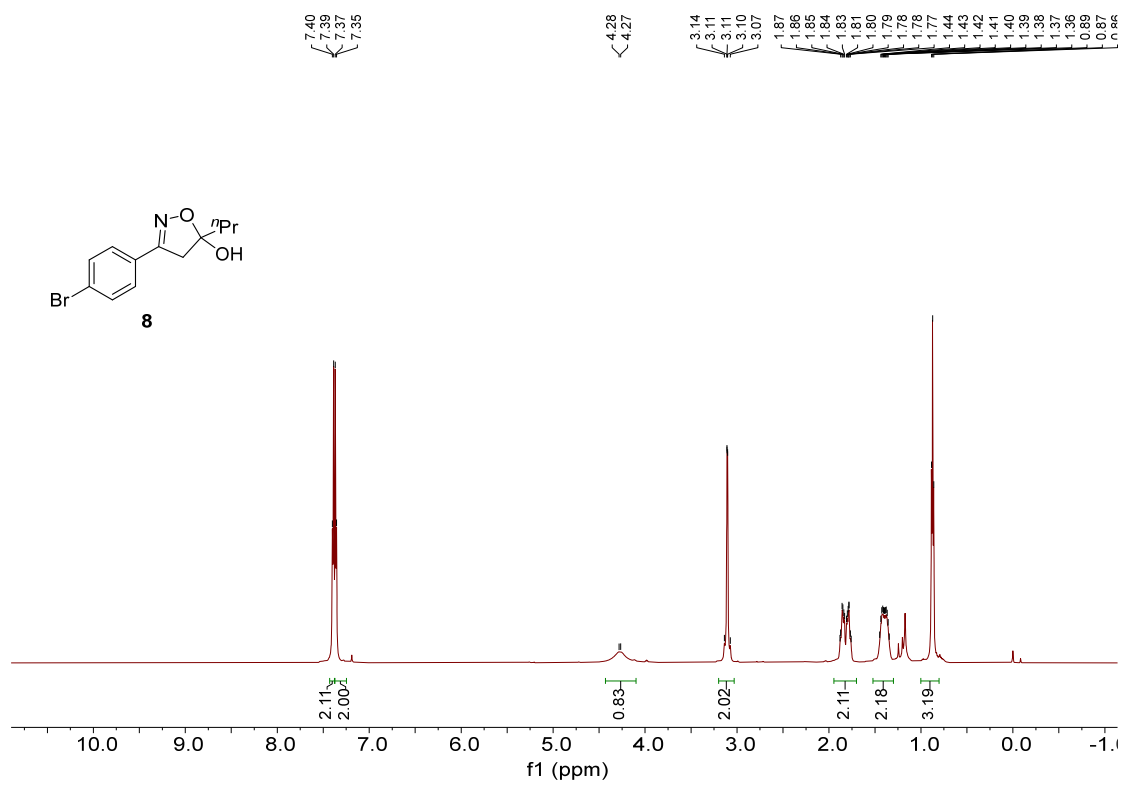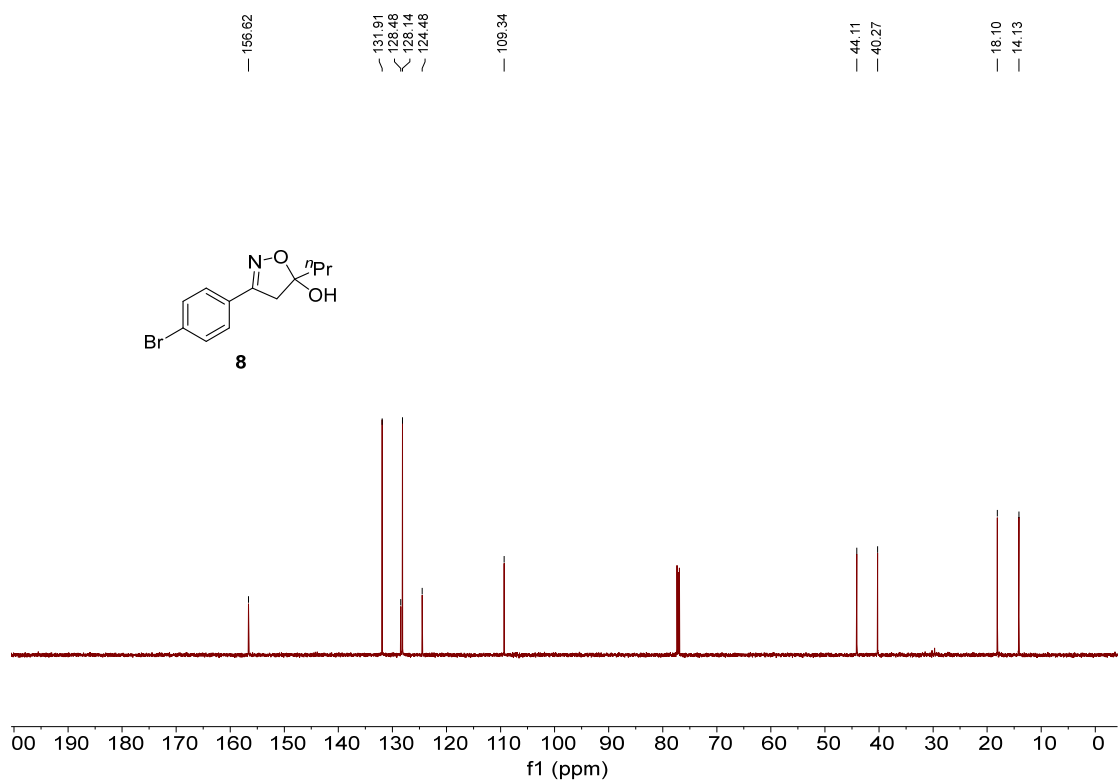

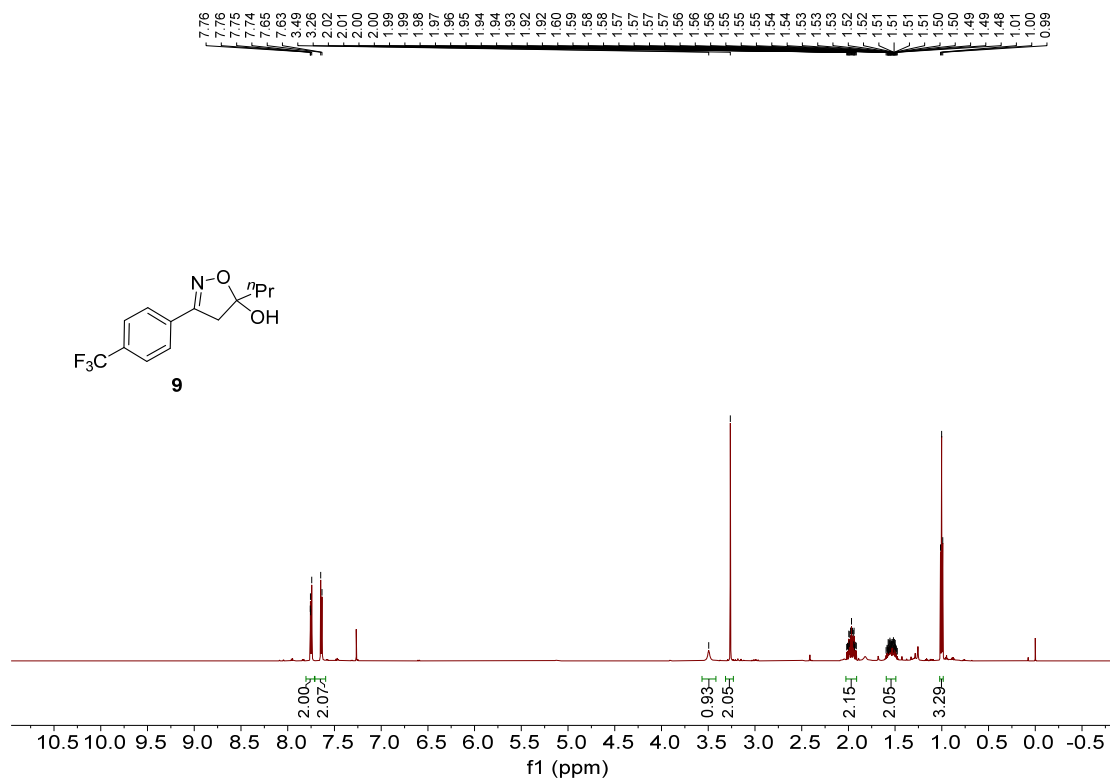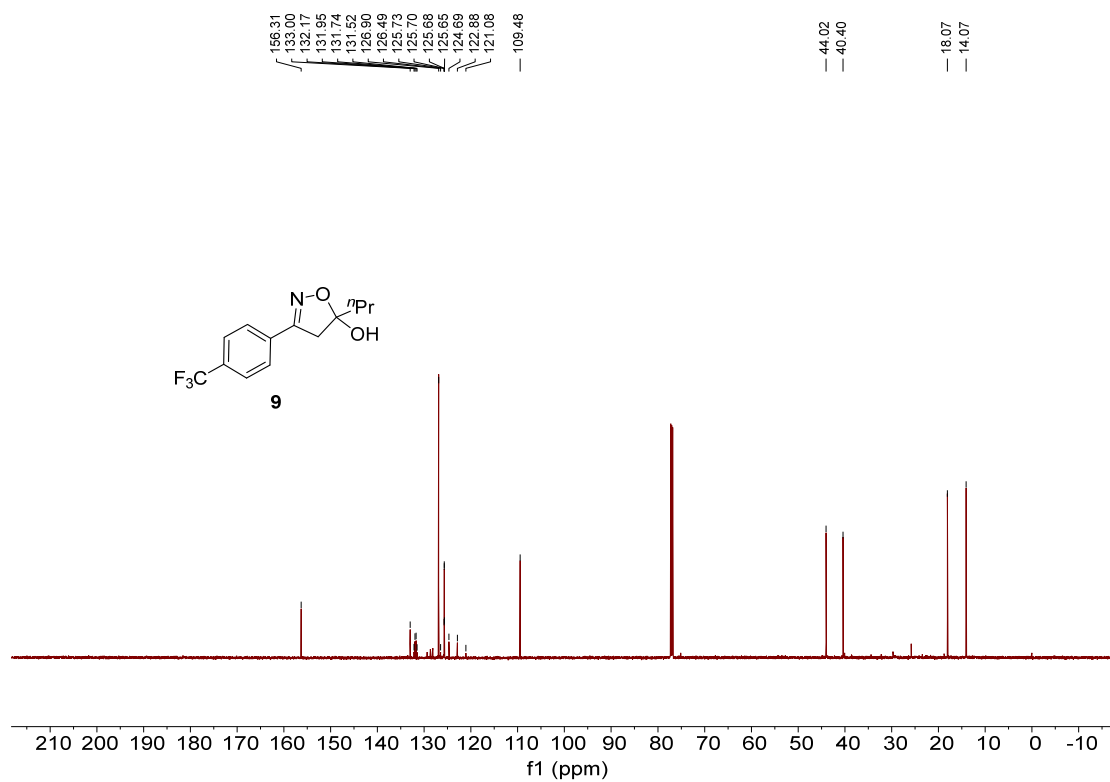



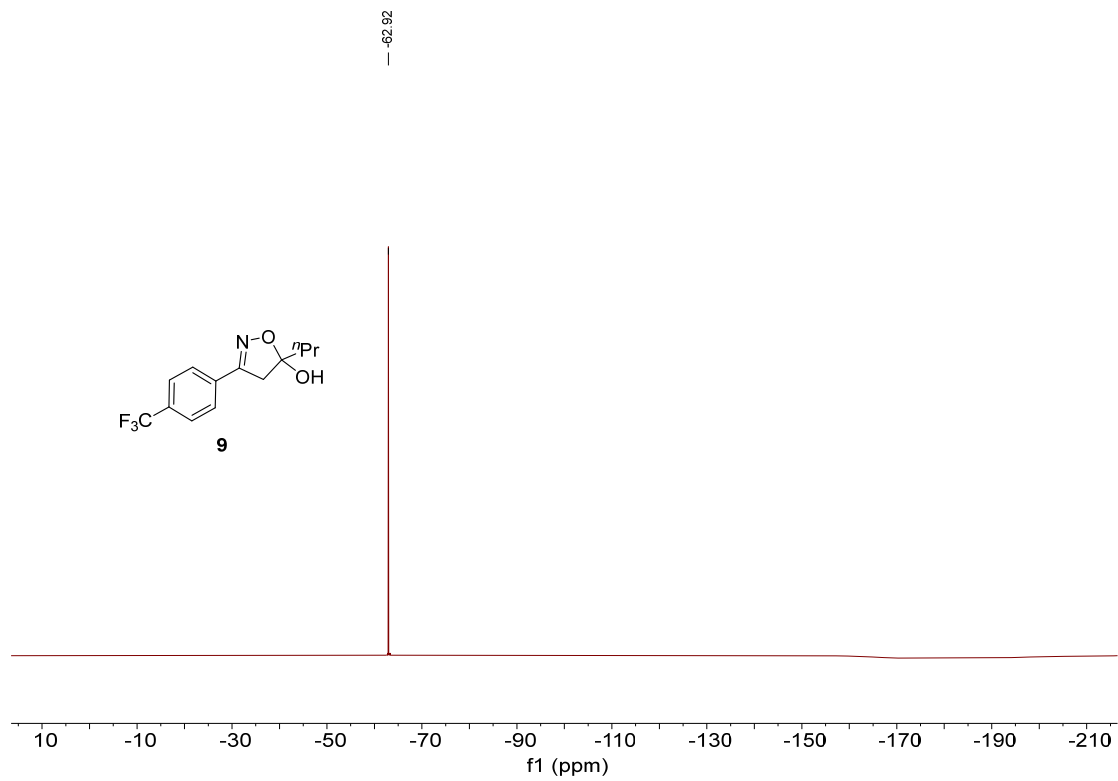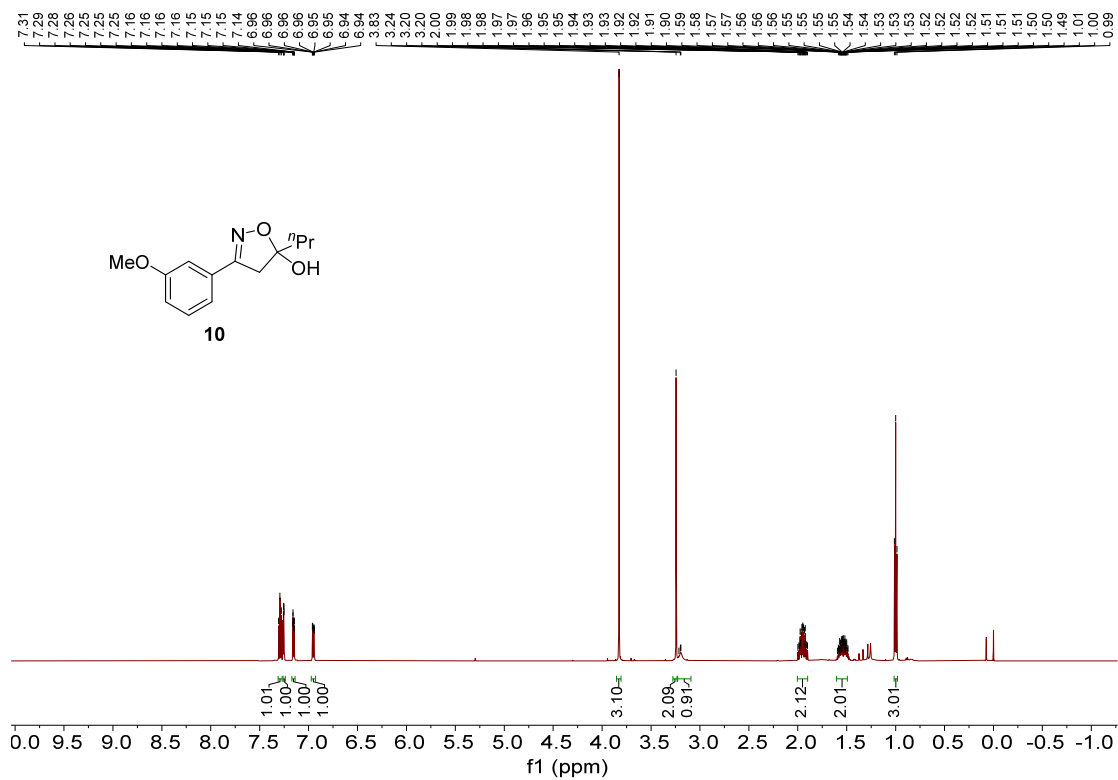

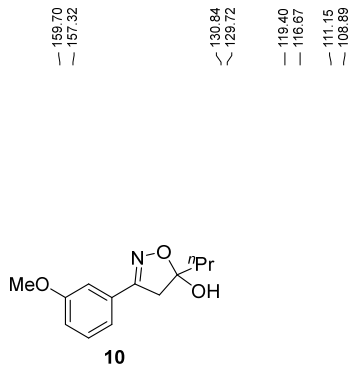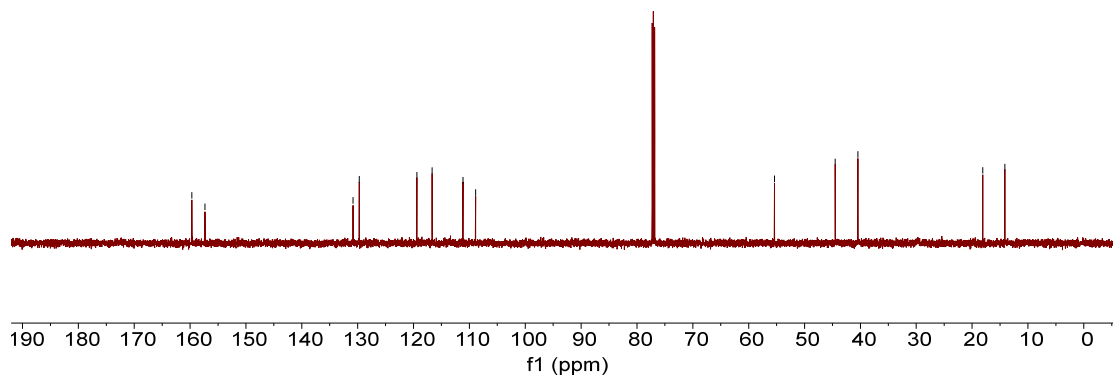

<sup>1</sup>H NMR chemical shifts (ppm):  
 7.68, 7.31, 7.30, 7.29, 6.91, 6.90, 6.89, 6.86, 6.84

<sup>1</sup>H NMR chemical shifts (ppm):  
 3.78, 3.76, 3.34, 3.32, 3.31, 3.30, 3.30, 3.28, 3.27, 2.89

<sup>1</sup>H NMR chemical shifts (ppm):  
 1.91, 1.90, 1.89, 1.88, 1.87, 1.86, 1.85, 1.85, 1.84, 1.83, 1.52, 1.51, 1.50, 1.49, 1.48, 1.47, 1.46, 1.45, 1.44, 1.43, 1.42, 0.94, 0.93, 0.93

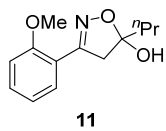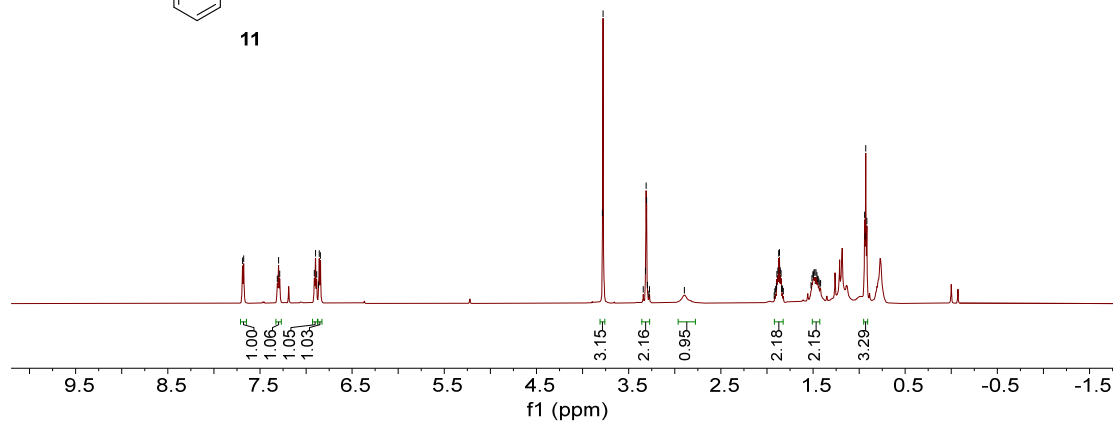

167.51  
166.76  
131.44  
129.32  
120.85  
118.77  
111.36  
108.43  
55.49  
47.35  
40.44  
18.10  
14.19

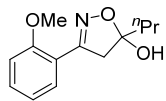

11

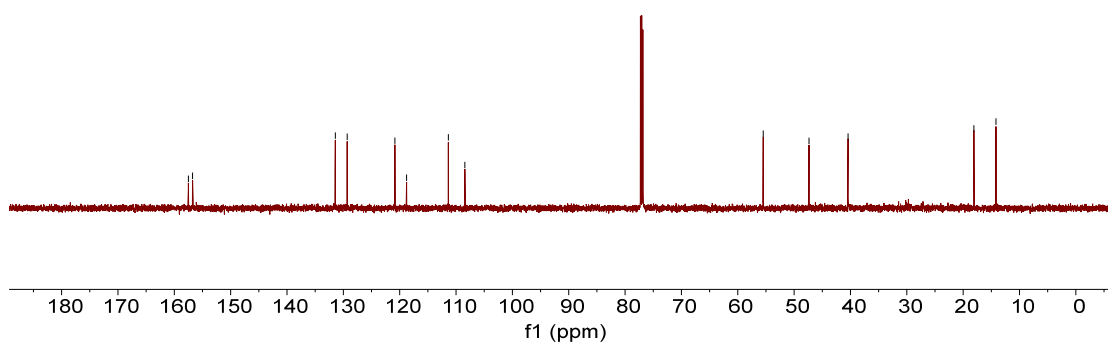

7.52  
7.52  
7.51  
7.51  
7.48  
7.48  
7.47  
7.47  
7.26  
7.26  
7.25  
7.25  
7.24  
7.24  
7.23  
7.23  
7.18  
7.18  
7.17  
7.17  
7.16  
7.16  
7.15  
7.15  
3.67  
3.67  
3.27  
3.27  
3.24  
3.24  
1.92  
1.91  
1.90  
1.90  
1.89  
1.89  
1.88  
1.88  
1.87  
1.87  
1.86  
1.86  
1.85  
1.85  
1.84  
1.84  
1.50  
1.50  
1.49  
1.49  
1.48  
1.48  
1.48  
1.48  
1.46  
1.46  
1.47  
1.47  
1.46  
1.46  
1.45  
1.45  
1.45  
1.45  
1.44  
1.44  
1.44  
1.44  
1.43  
1.43  
1.43  
1.43  
1.42  
1.42  
1.41  
1.41  
1.40  
1.40  
0.92  
0.91  
0.90

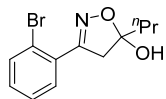

12

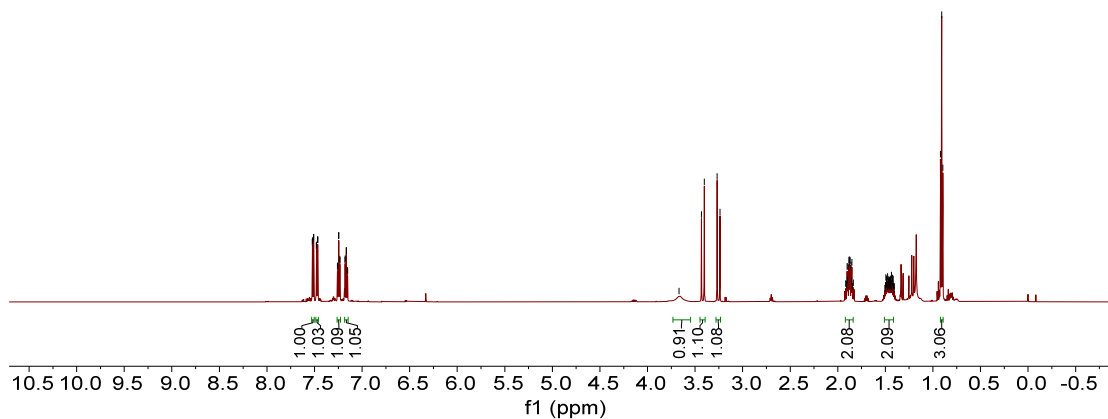

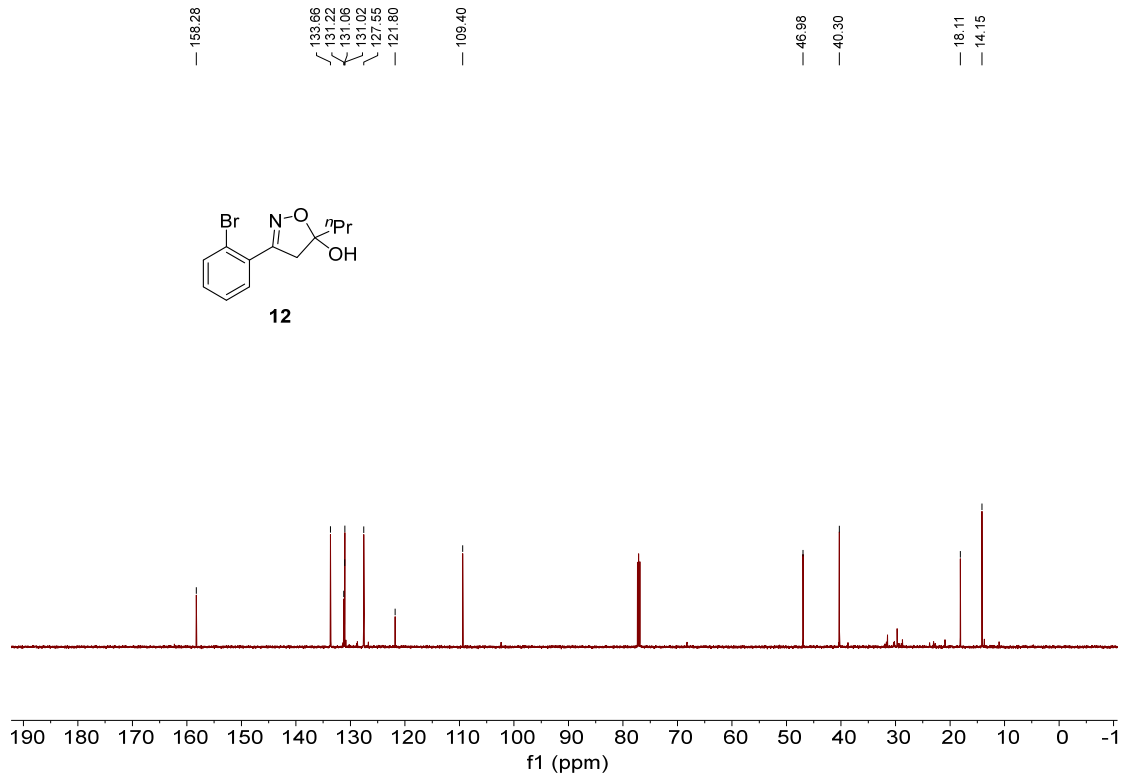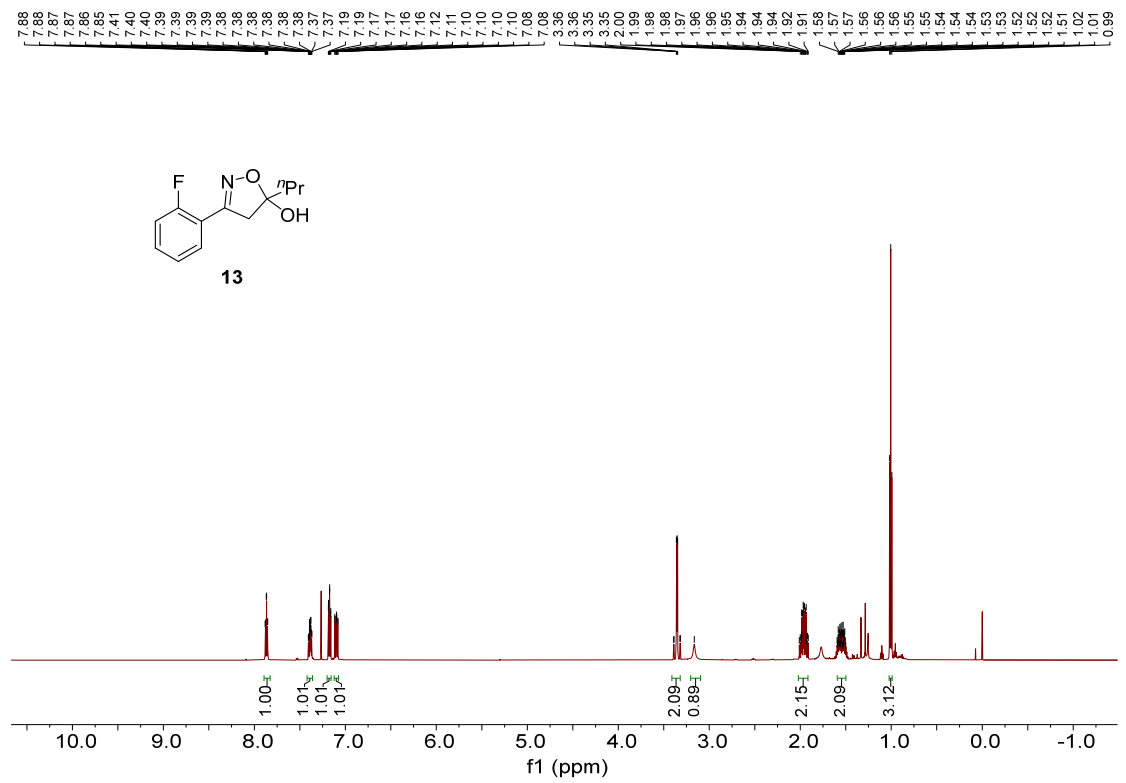

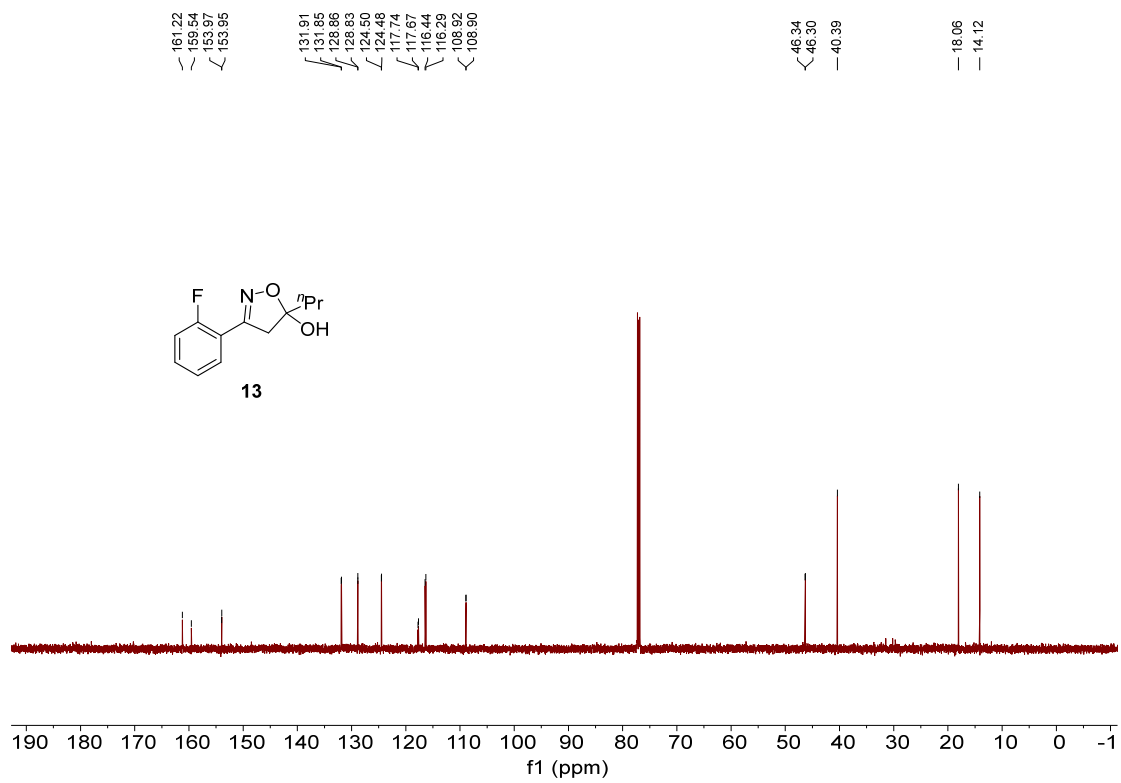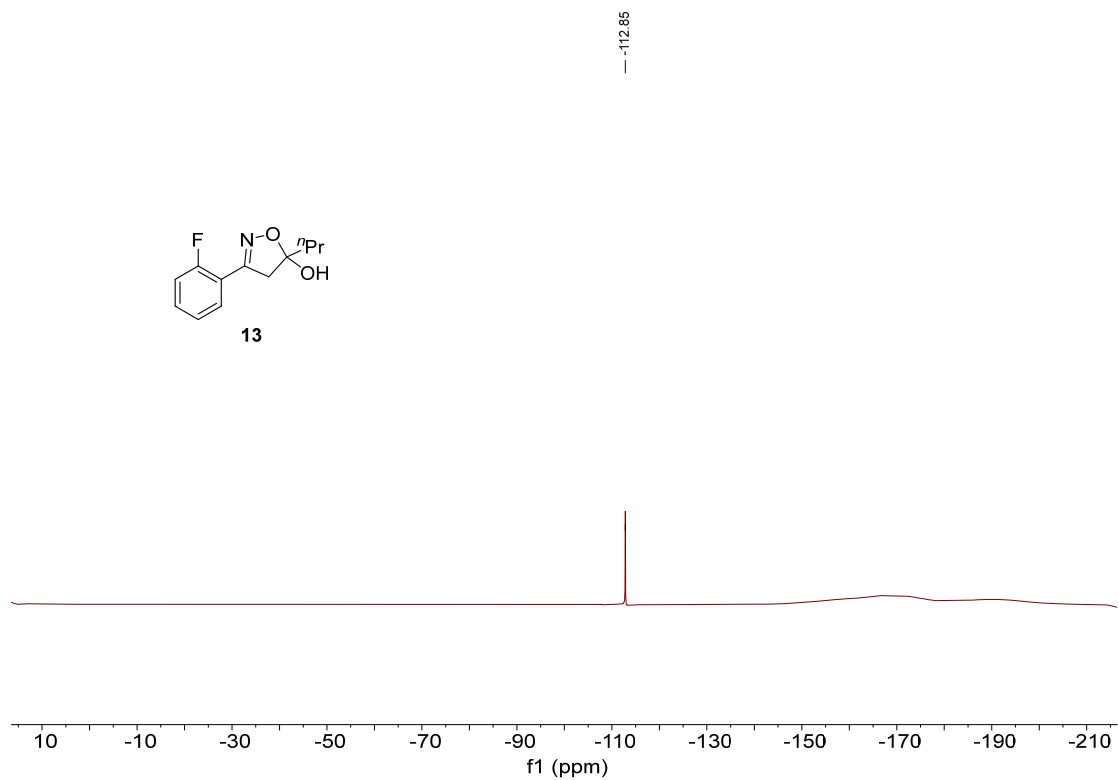



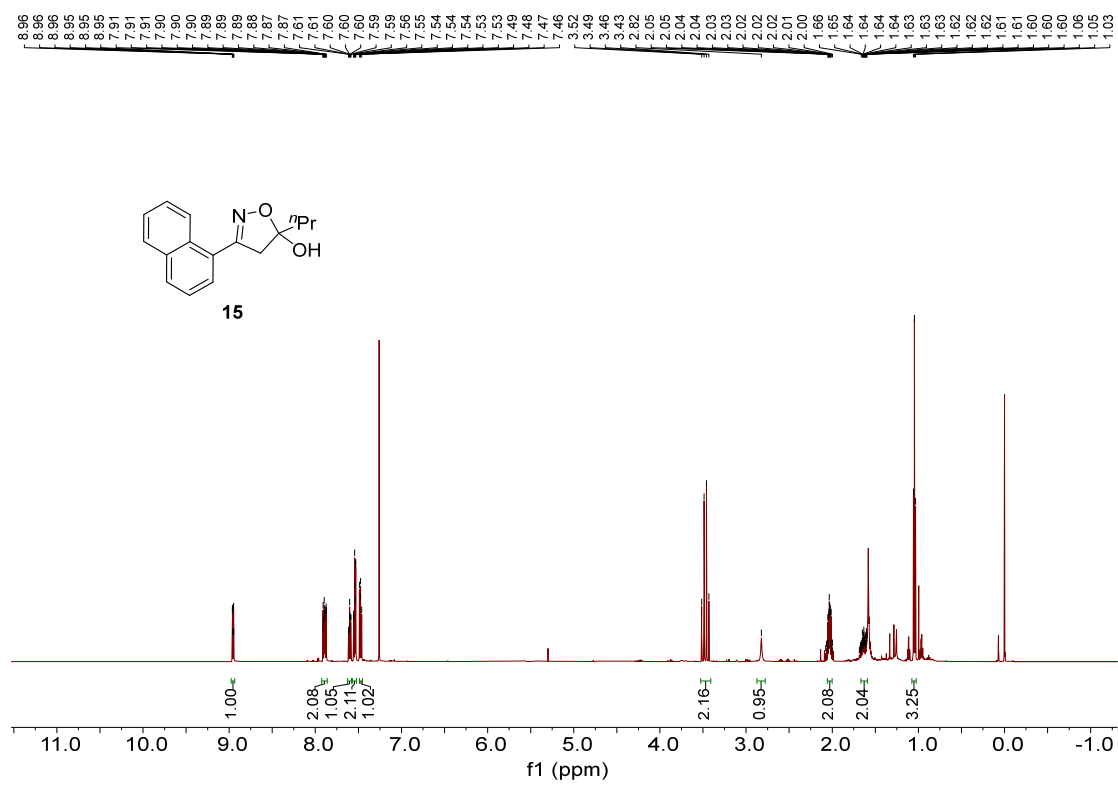

Chemical shifts (ppm): 158.24, 133.99, 130.95, 130.64, 128.55, 127.84, 127.57, 126.96, 126.72, 124.77, 107.53, 47.51, 40.41, 18.19, 14.17.

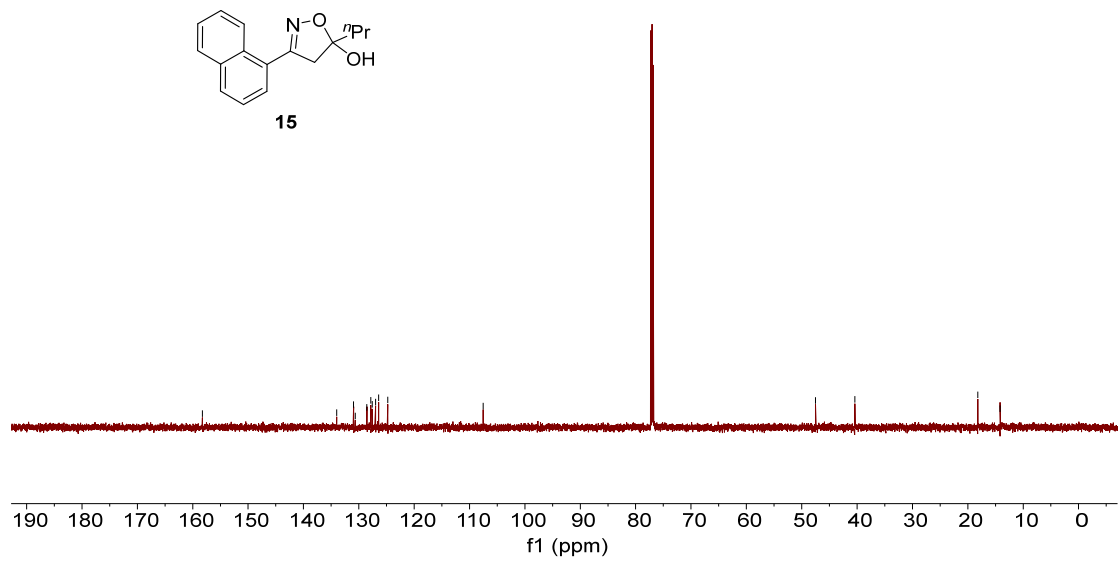

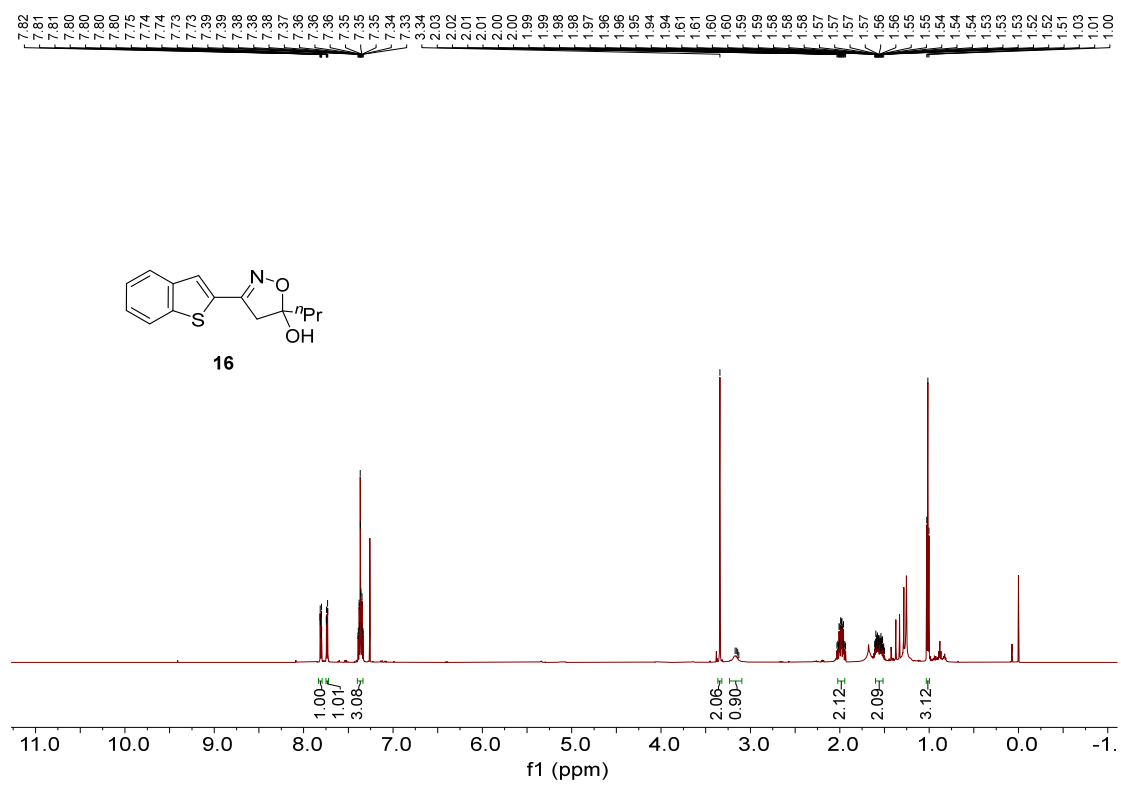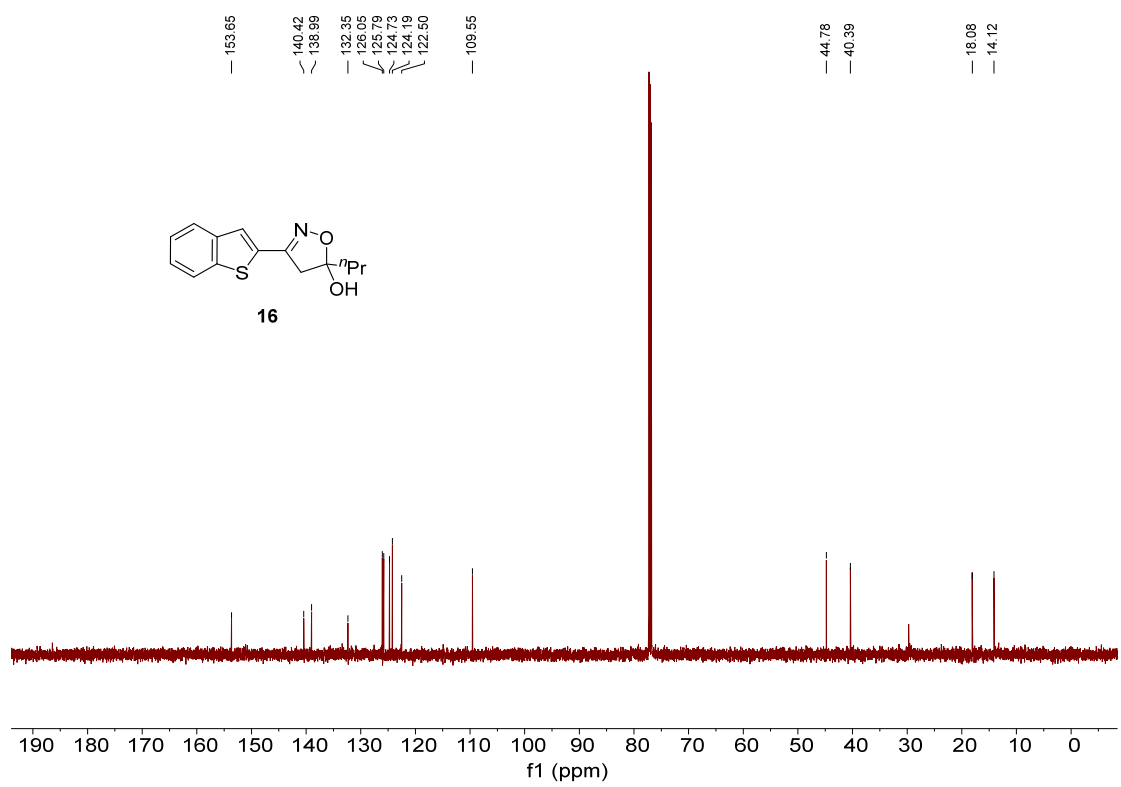



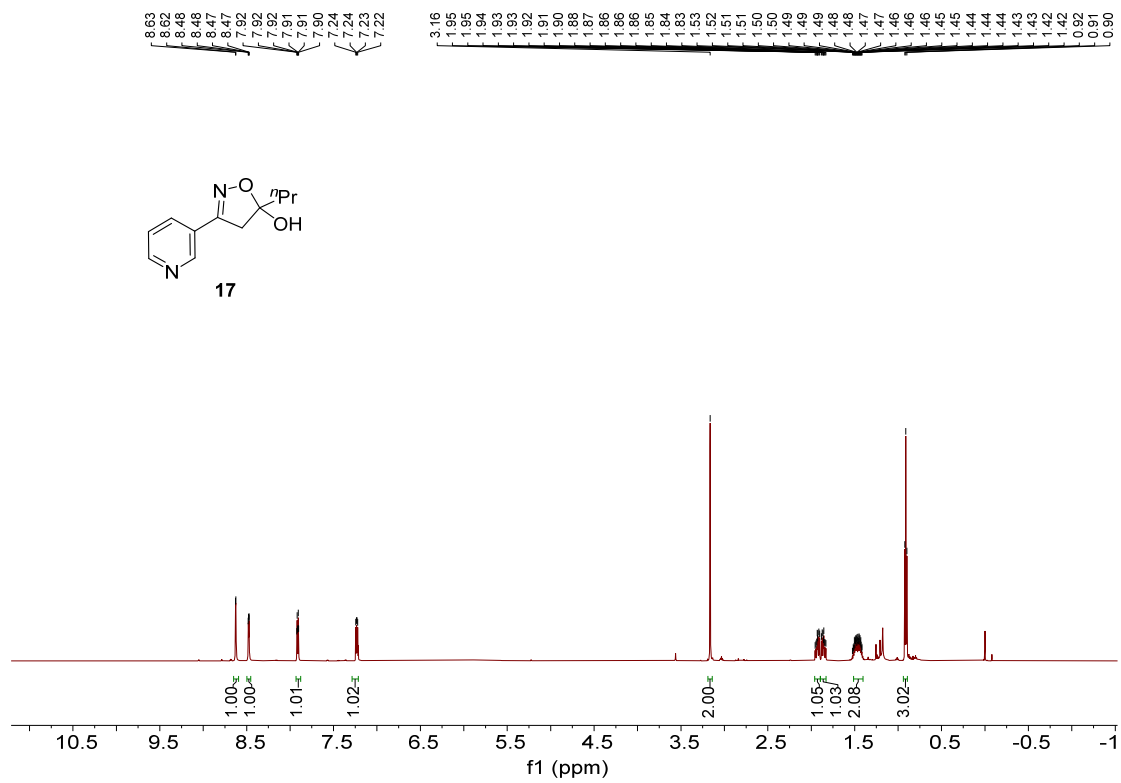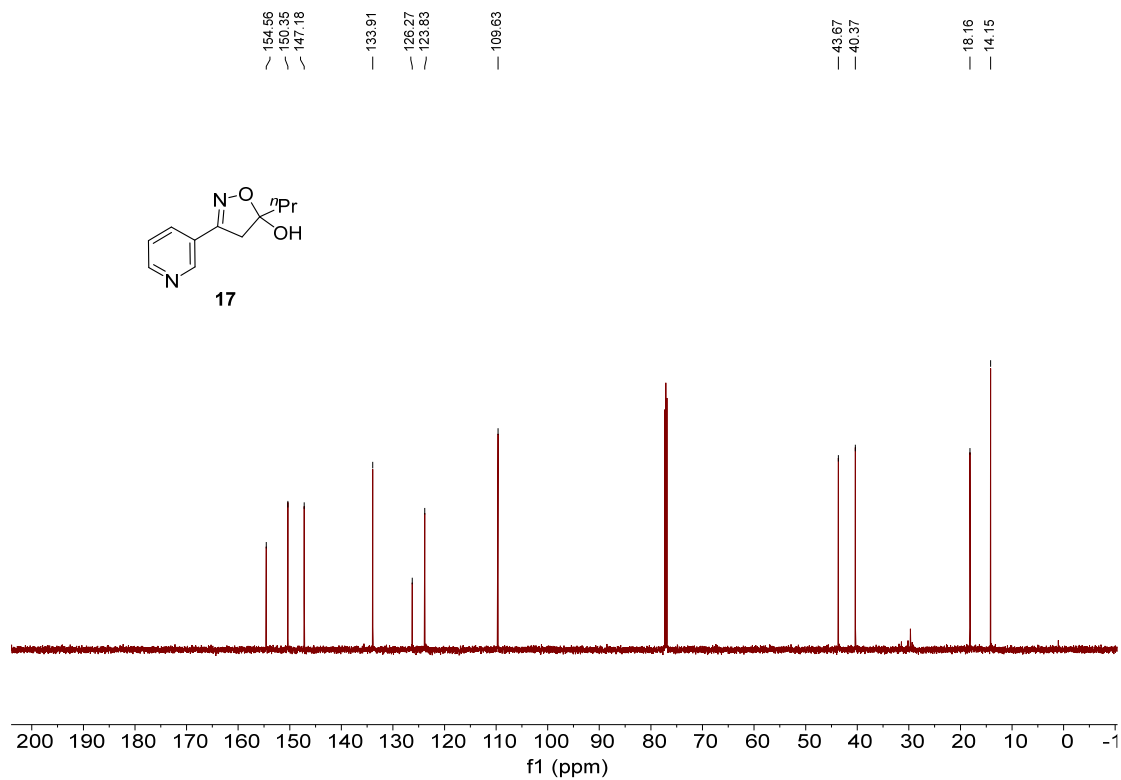

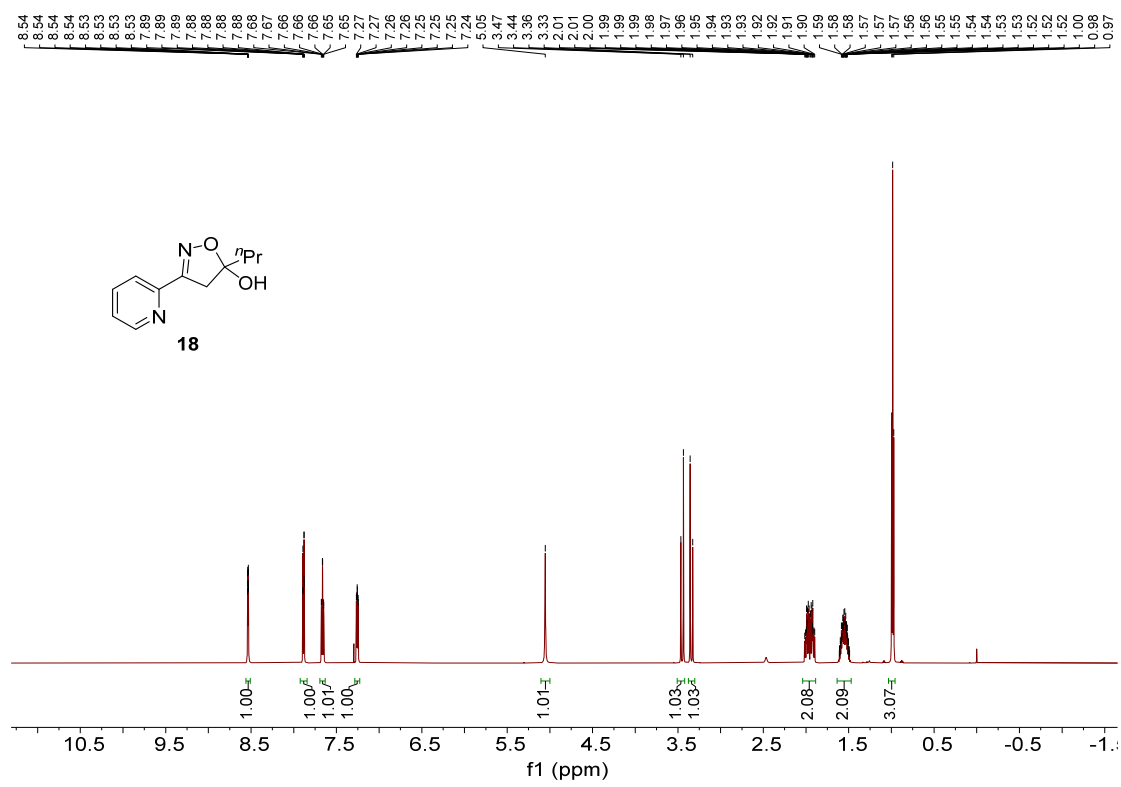

- 158.62
- 148.13
- 148.01
- 136.61
- 124.38
- 121.59
- 109.94
- 43.81
- 40.29
- 18.06
- 14.15

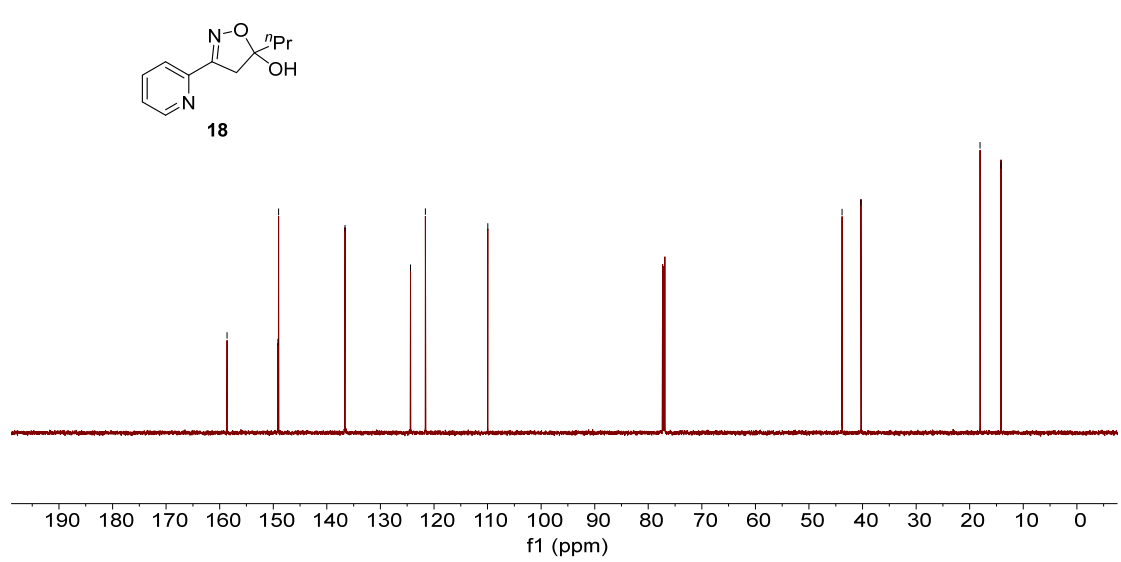

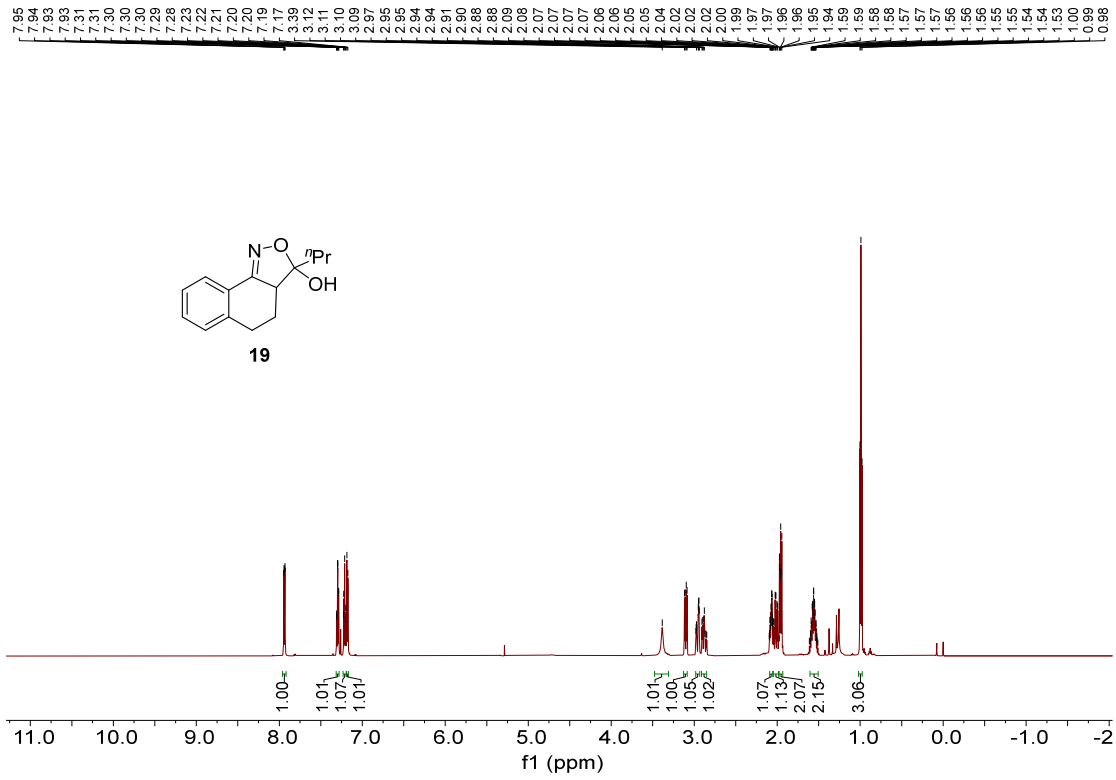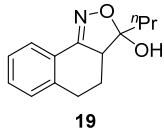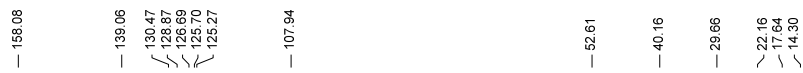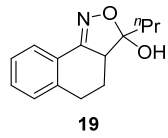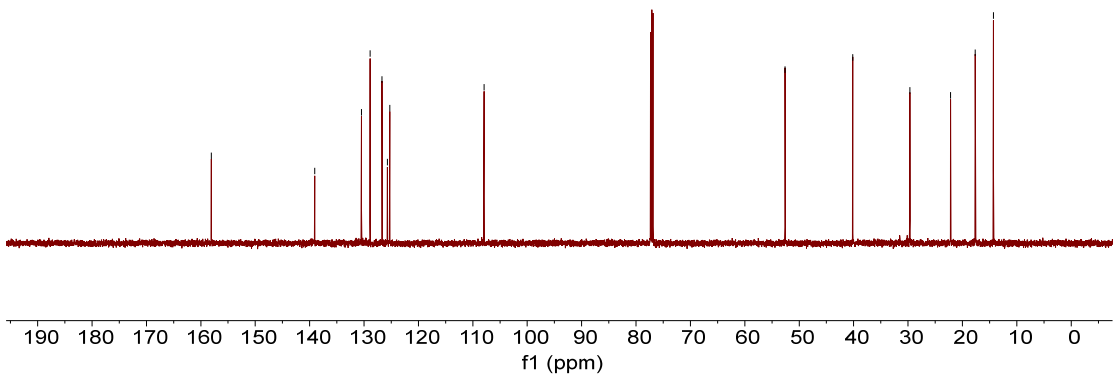

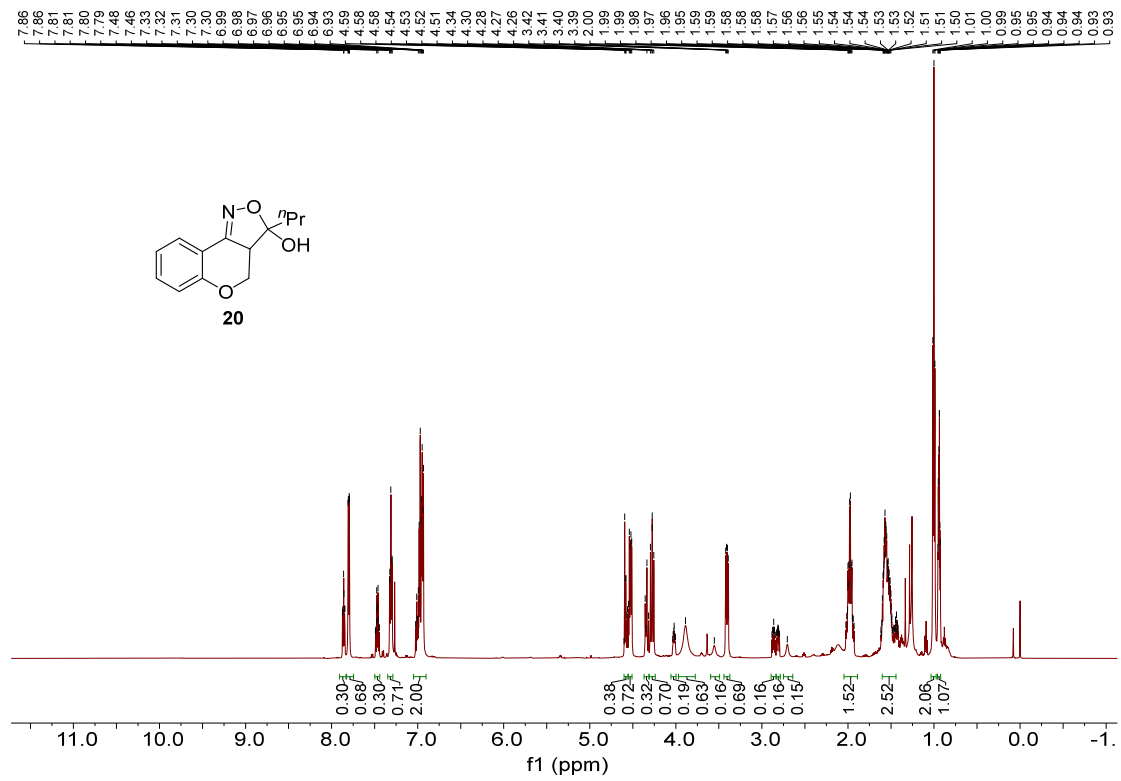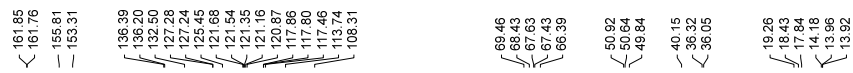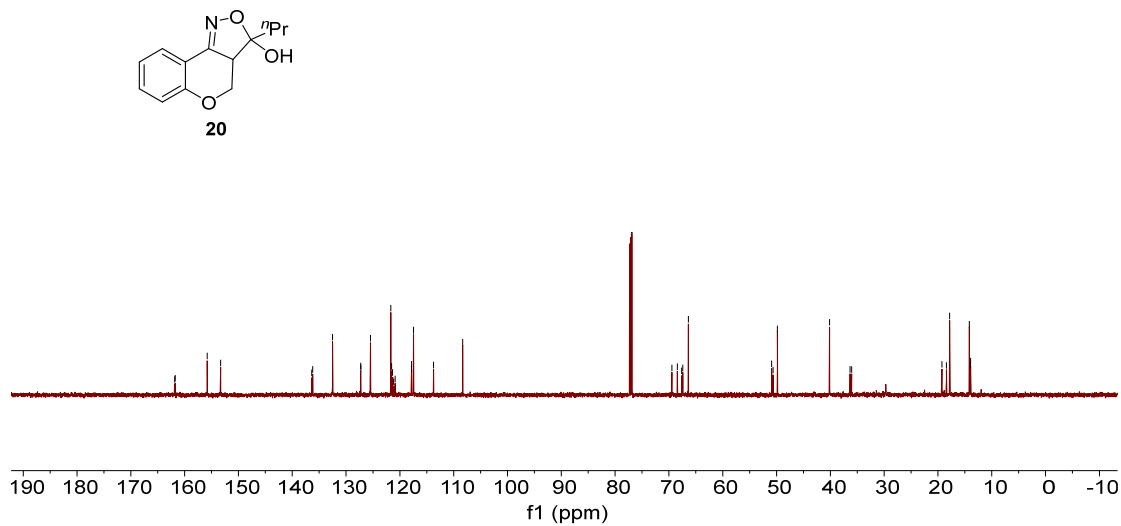

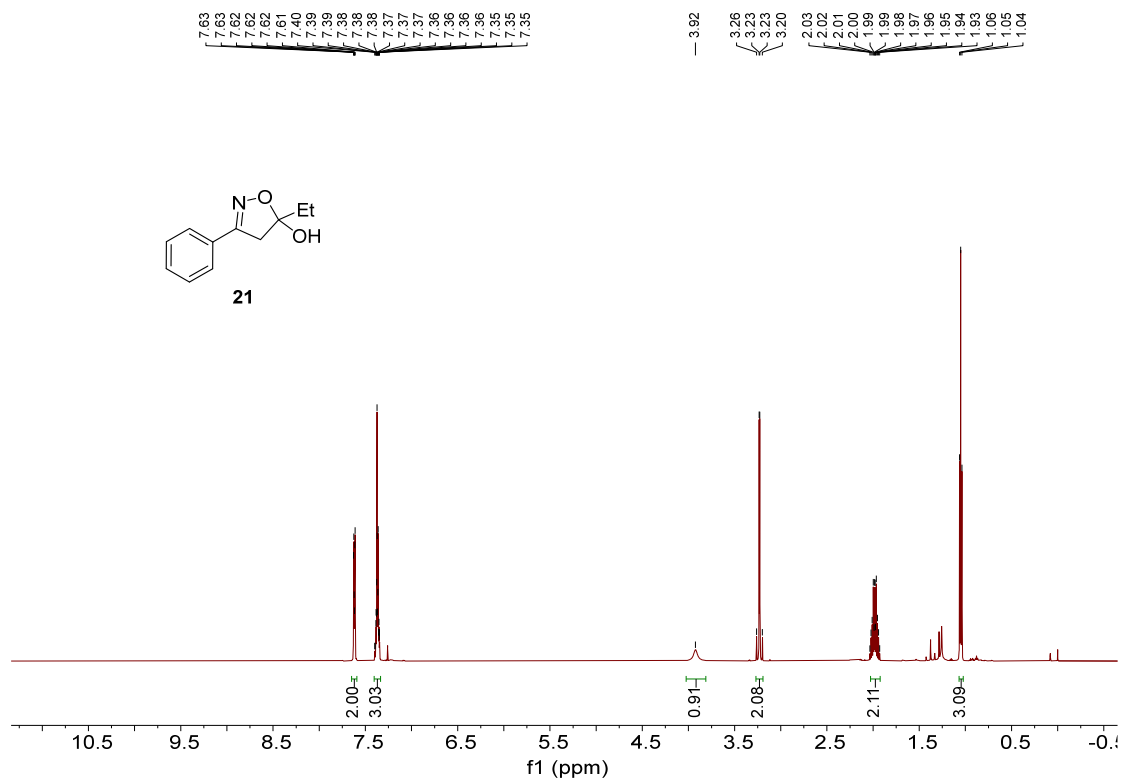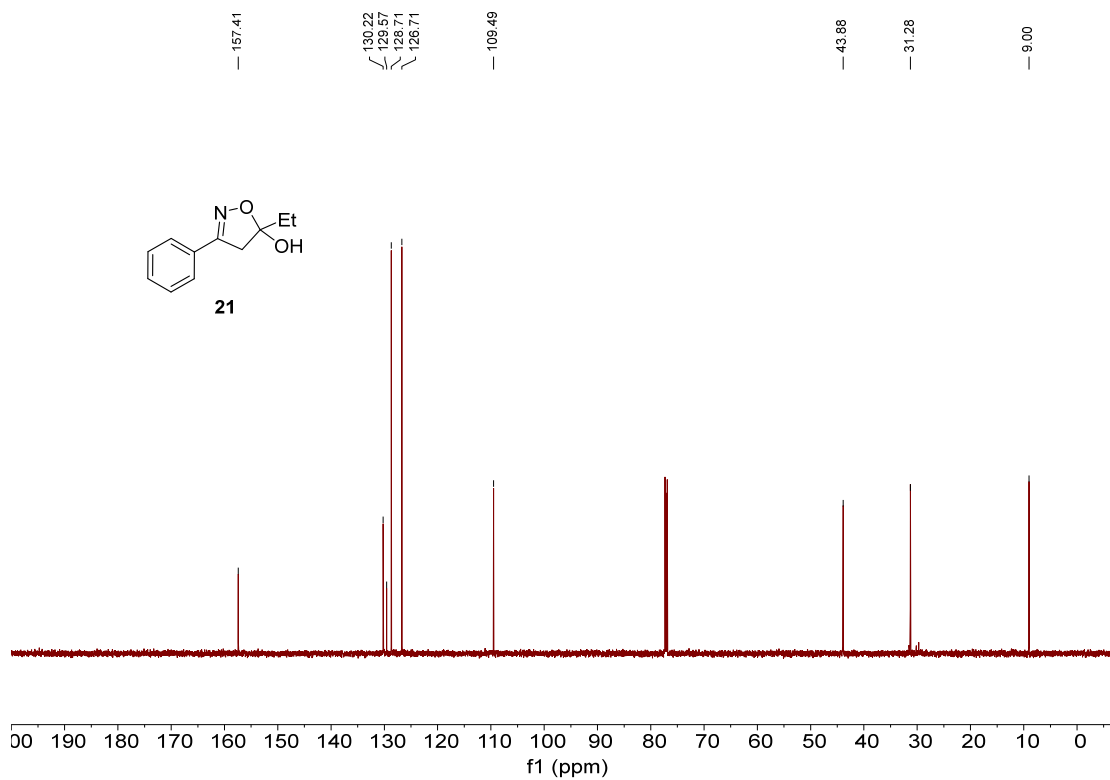

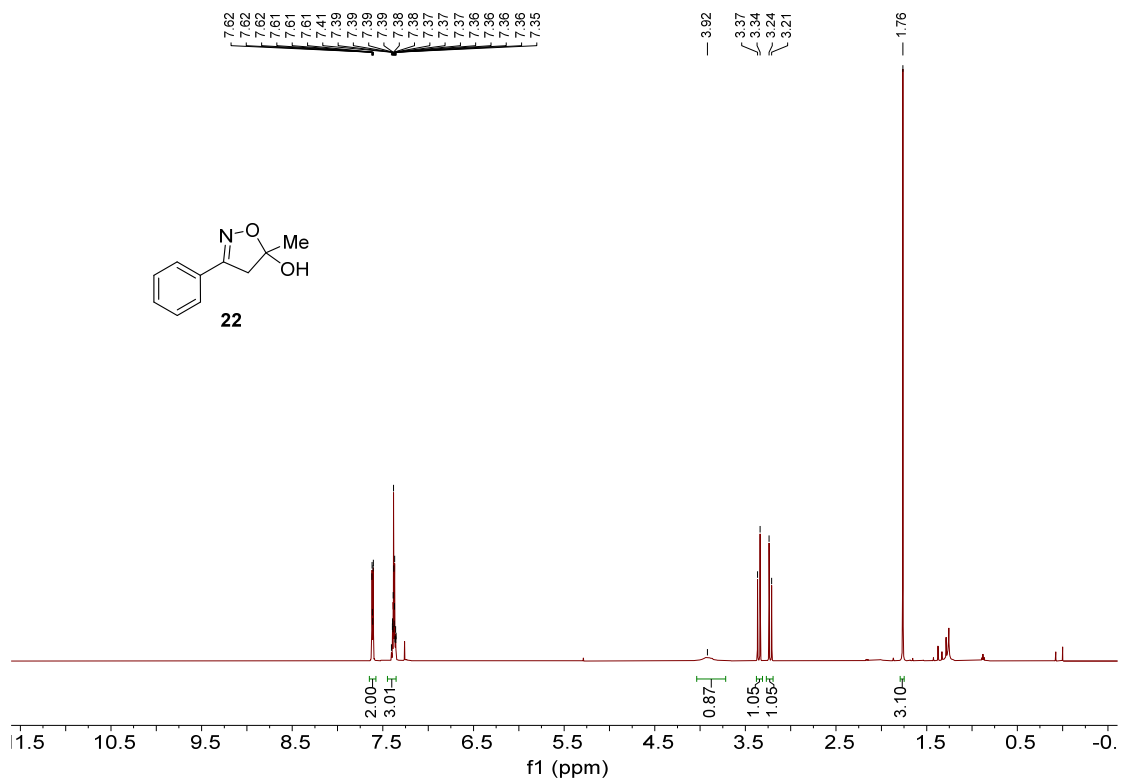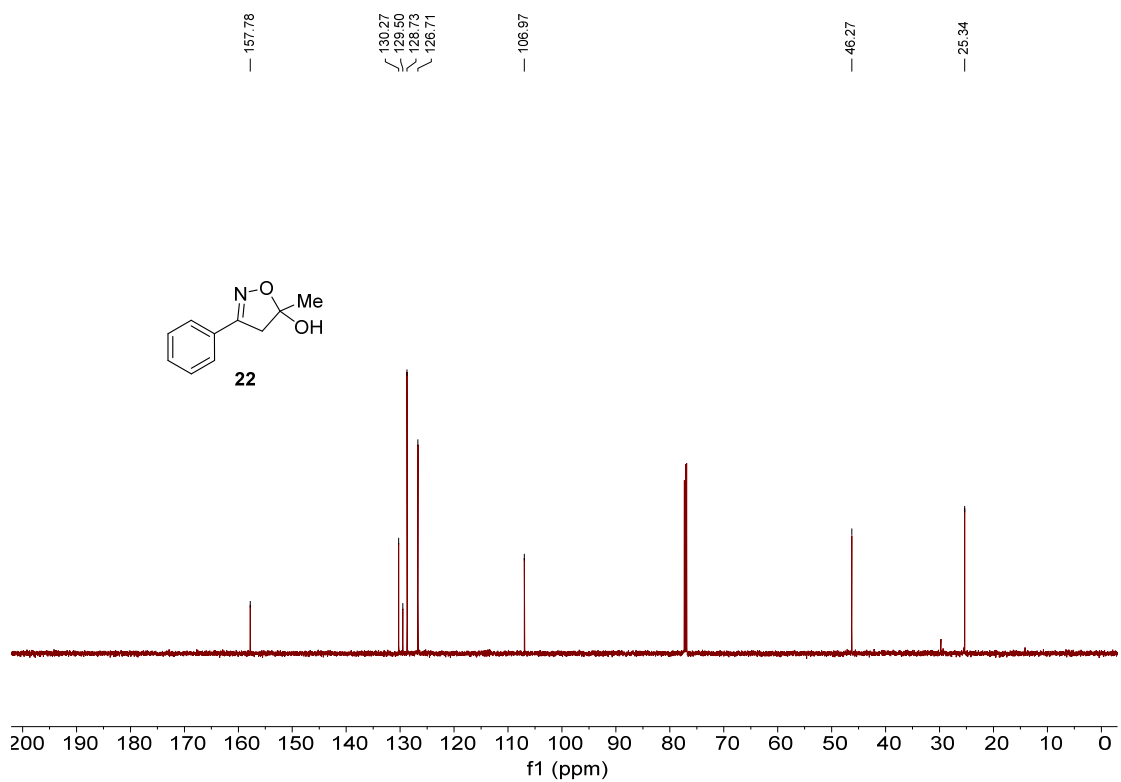



7.62  
7.61  
7.61  
7.40  
7.40  
7.39  
7.39  
7.38  
7.38  
7.37  
7.37  
7.36  
7.36  
3.97  
3.55  
3.54  
3.29  
3.29  
3.22  
2.00  
2.00  
1.99  
1.99  
1.98  
1.97  
1.96  
1.96  
1.95  
1.94  
1.94  
1.93  
1.92  
1.91  
1.85  
1.85  
1.84  
1.84  
1.83  
1.83  
1.82  
1.80  
1.80  
1.68  
1.68  
1.67  
1.67  
1.66  
1.66  
1.66  
1.65  
1.65  
1.64  
1.64  
1.63  
1.63  
1.62  
1.62  
1.61  
1.61

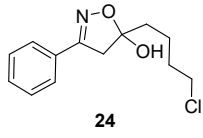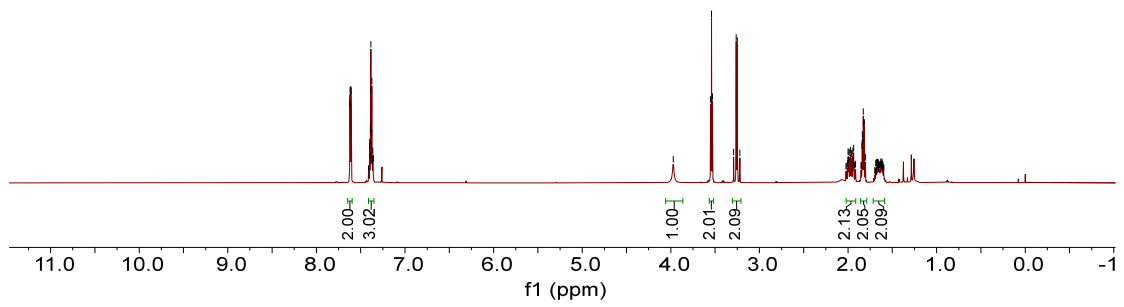

157.49  
130.35  
128.39  
128.77  
126.72  
108.74  
44.76  
44.55  
37.39  
32.29  
22.12

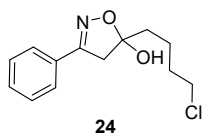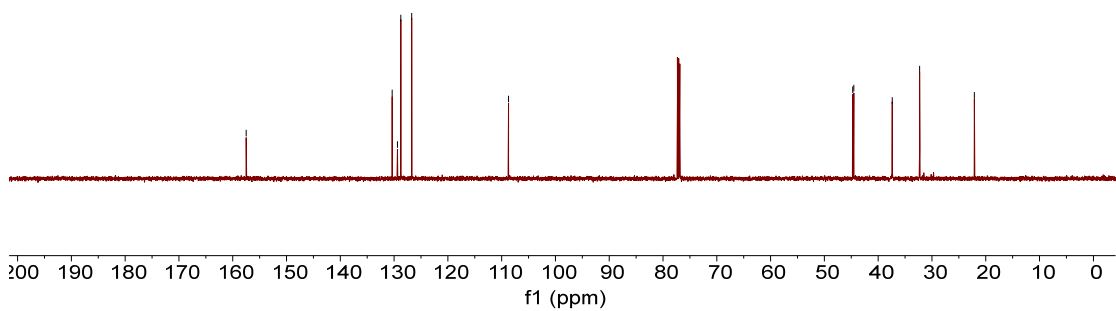



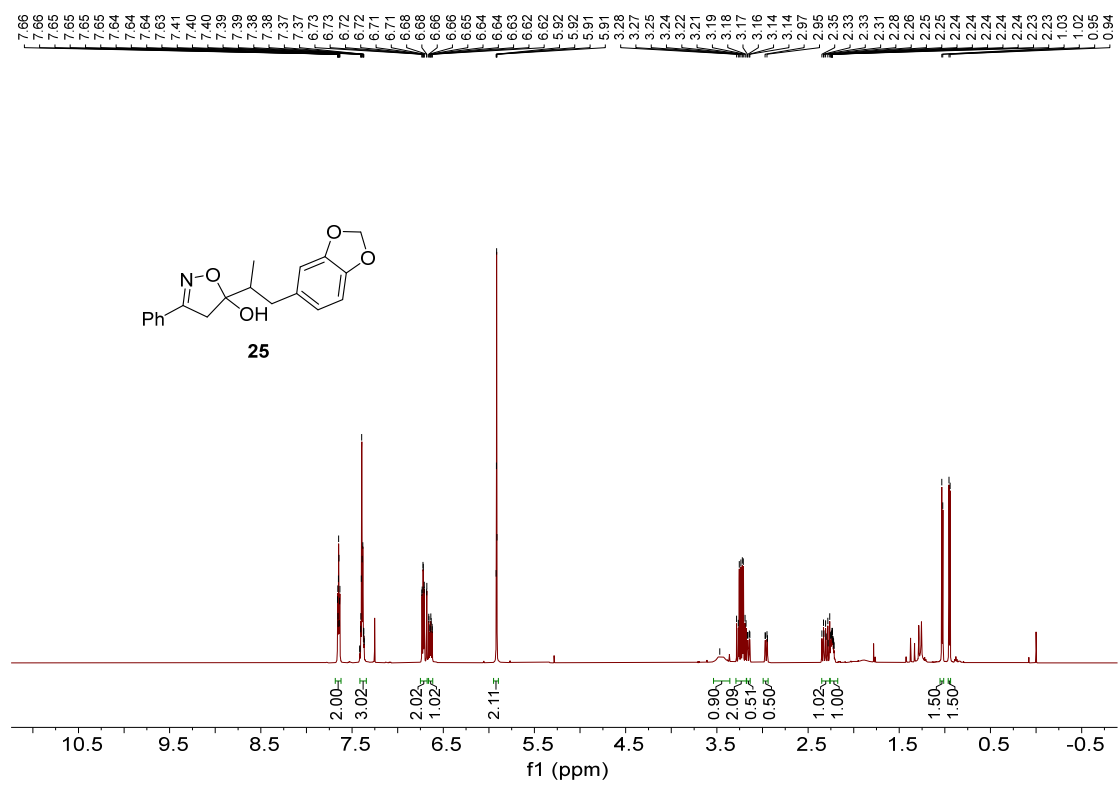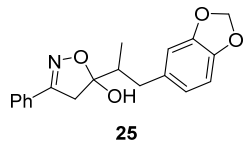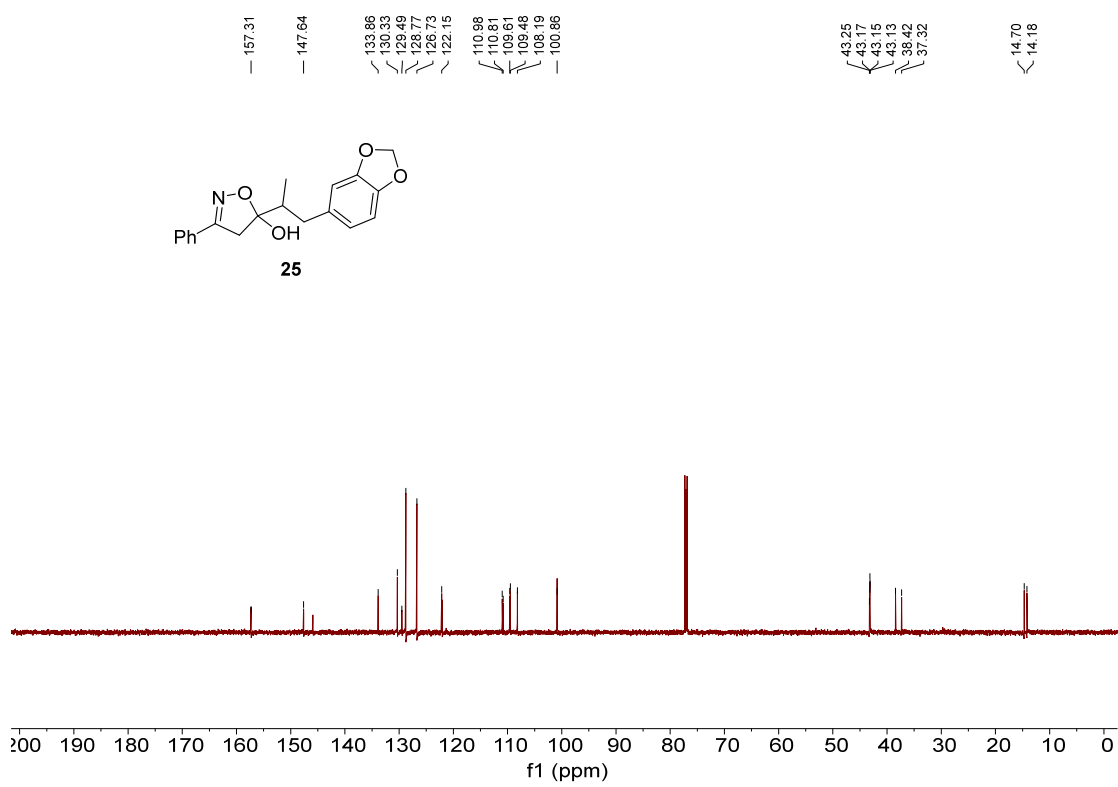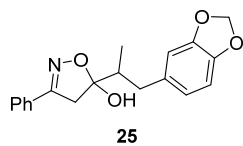

7.56  
7.56  
7.56  
7.55  
7.54  
7.33  
7.33  
7.32  
7.32  
7.31  
7.31  
7.31  
7.30  
7.30  
7.30  
3.93  
3.92  
3.91  
3.91  
3.91  
3.90  
3.89  
3.88  
3.88  
3.76  
3.75  
3.74  
3.73  
3.72  
3.71  
3.71  
3.68  
3.67  
3.66  
3.64  
3.63  
3.63  
3.62  
3.61  
3.60  
3.29  
3.28  
3.28  
3.21  
3.20  
3.20  
3.19  
3.18  
3.18  
3.15  
3.13  
3.12  
2.77  
2.76  
2.75  
2.74  
2.08  
2.07  
2.07  
2.06  
2.05  
2.05  
2.04  
1.78  
1.76

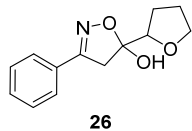

26

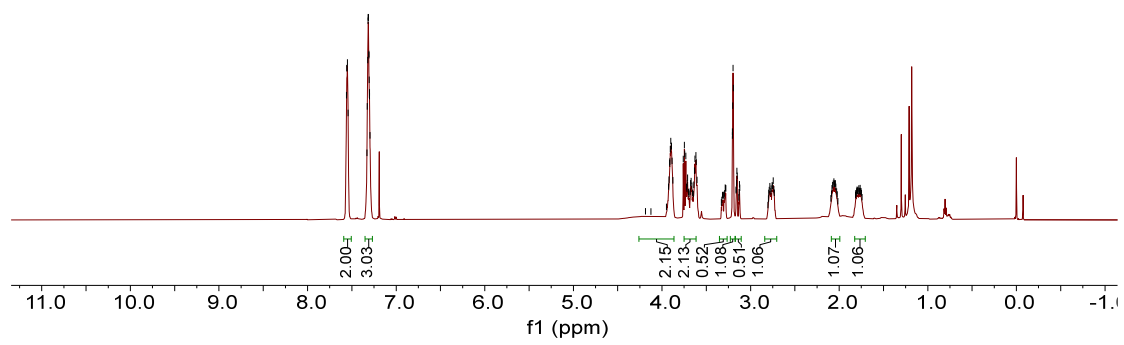

157.42  
157.33  
130.40  
129.31  
128.27  
128.77  
126.72  
126.69  
109.81  
69.79  
69.37  
68.53  
68.24  
46.27  
46.07  
43.63  
43.25  
28.62  
28.11

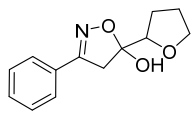

26

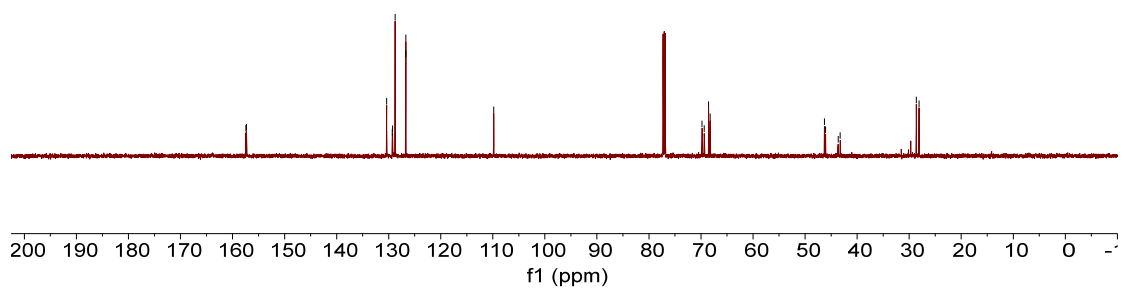

7.54  
7.54  
7.53  
7.53  
7.52  
7.31  
7.30  
7.30  
7.29  
7.29  
7.29  
7.28  
7.27  
7.27  
7.26  
7.25  
7.25  
7.22  
7.21  
7.21  
7.20  
7.20  
7.19  
7.17

3.25  
3.23  
3.22  
3.20  
3.19  
3.16

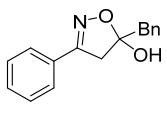

27

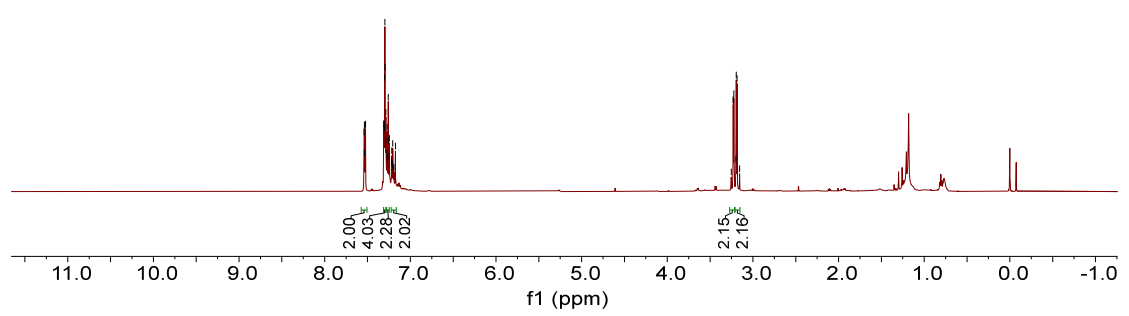

157.60

135.07  
130.45  
130.31  
129.42  
128.72  
128.67  
127.37  
126.72

107.99

44.57  
44.34

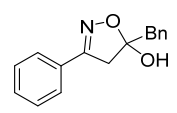

27

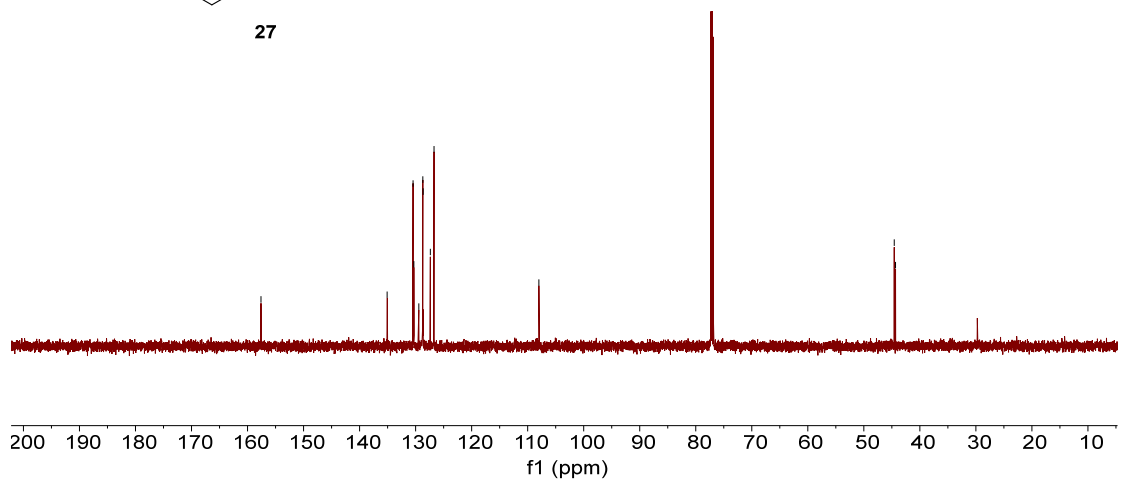

7.70  
7.70  
7.69  
7.69  
7.68  
7.68  
7.66  
7.65  
7.65  
7.44  
7.43  
7.43  
7.42  
7.42  
7.41  
7.41  
7.40  
7.40  
7.39  
7.39  
7.38  
7.38  
7.37  
7.37  
3.69  
3.67  
3.51  
3.50  
3.48  
3.47  
3.30

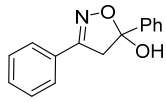

28

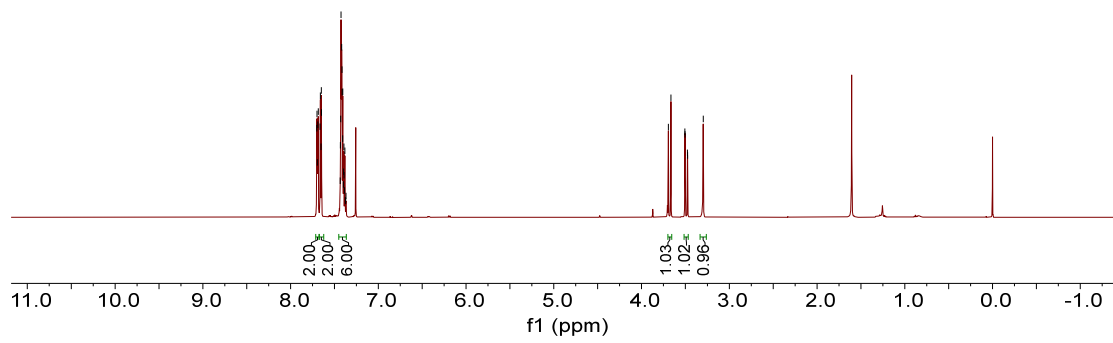

157.46  
140.70  
130.46  
128.25  
128.87  
128.82  
128.81  
128.64  
107.69  
49.02

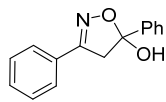

28

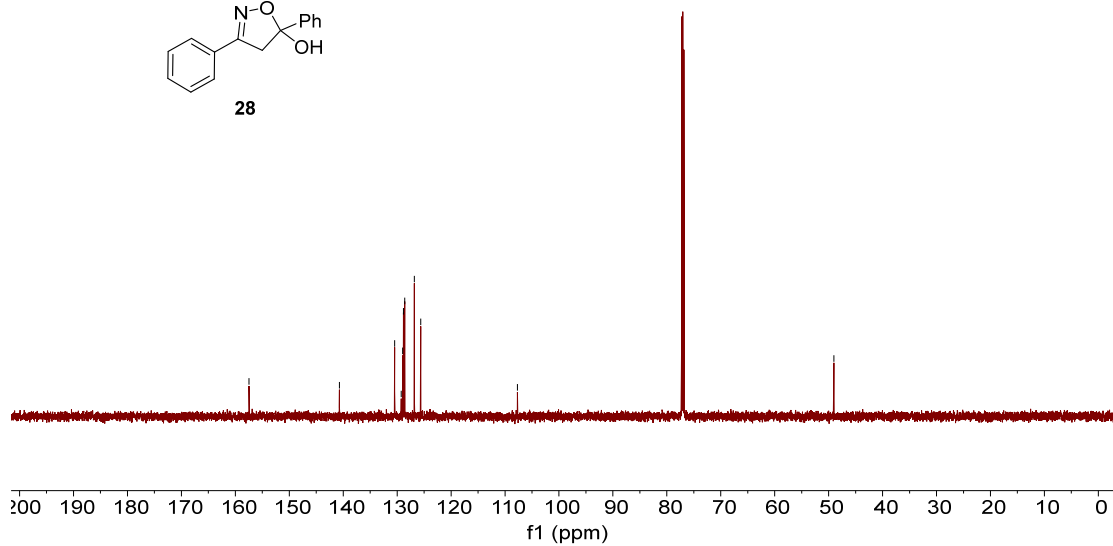

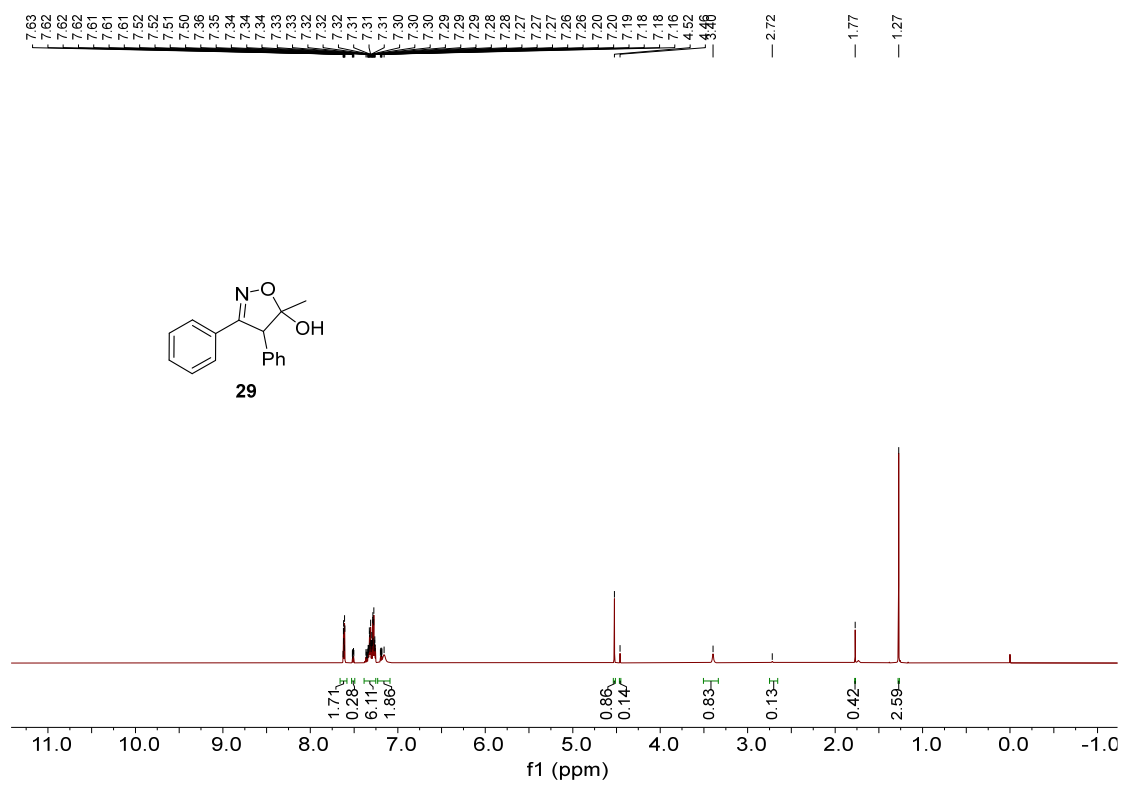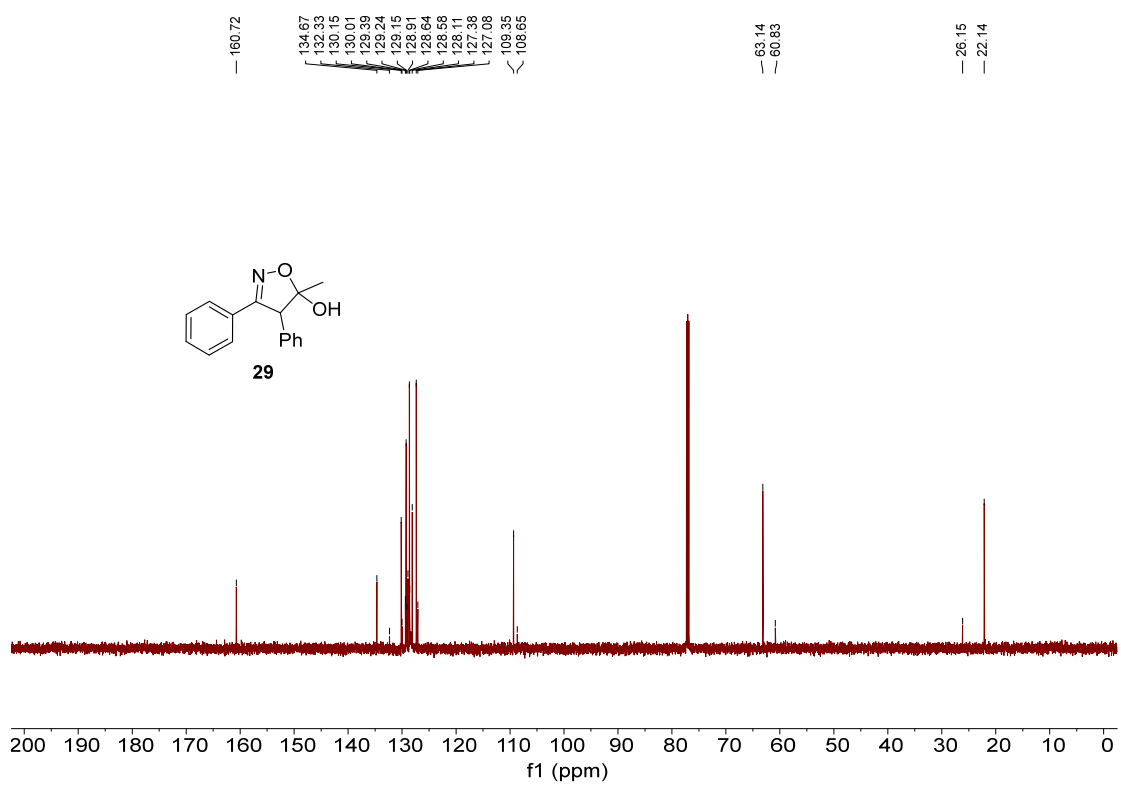

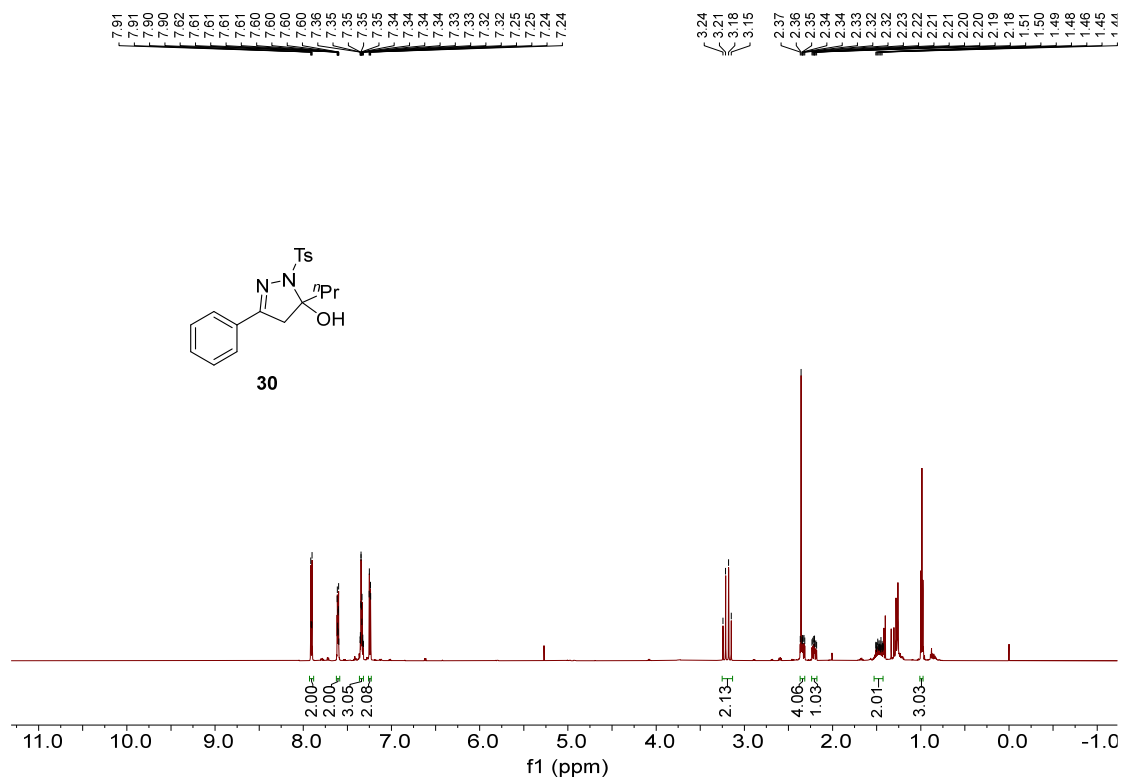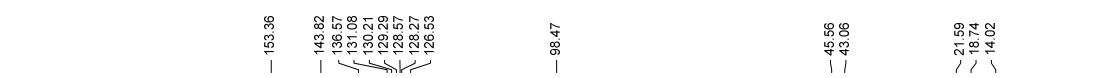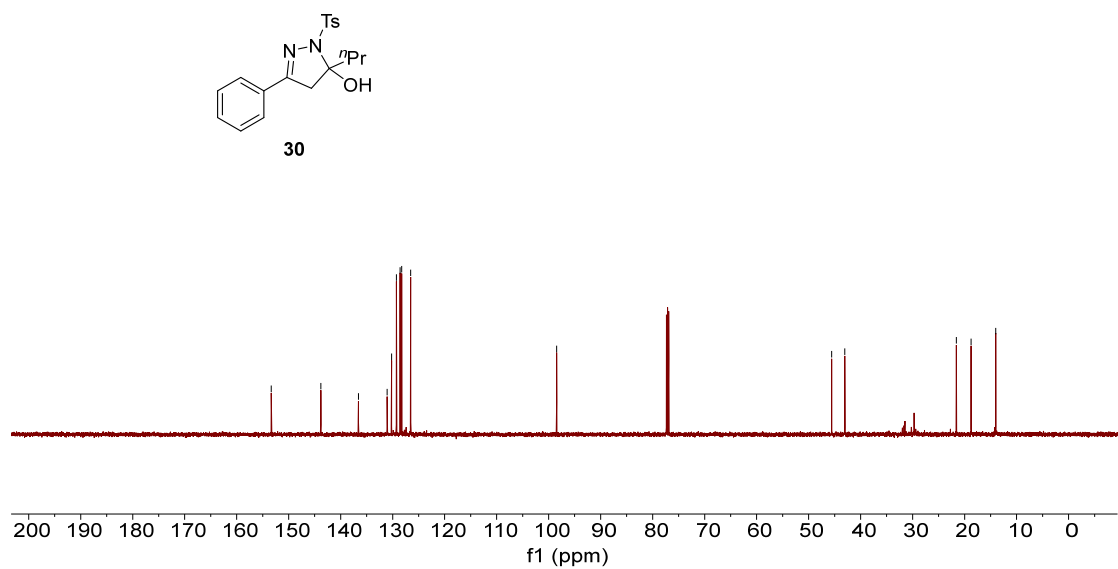

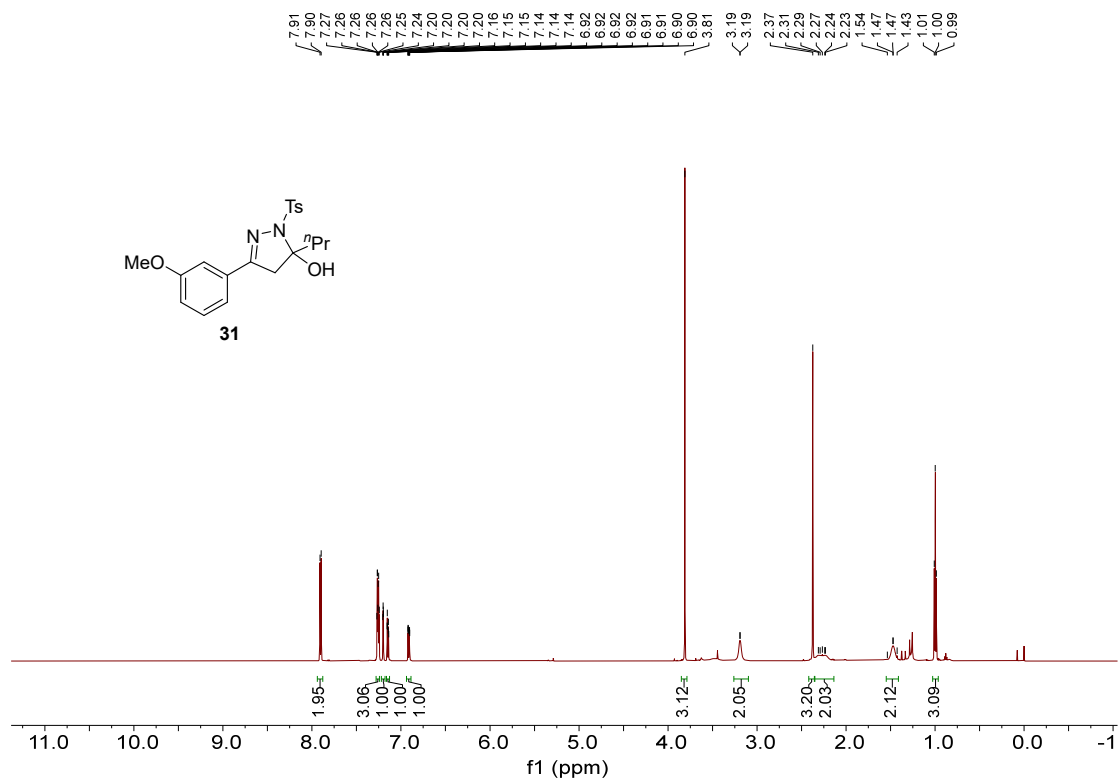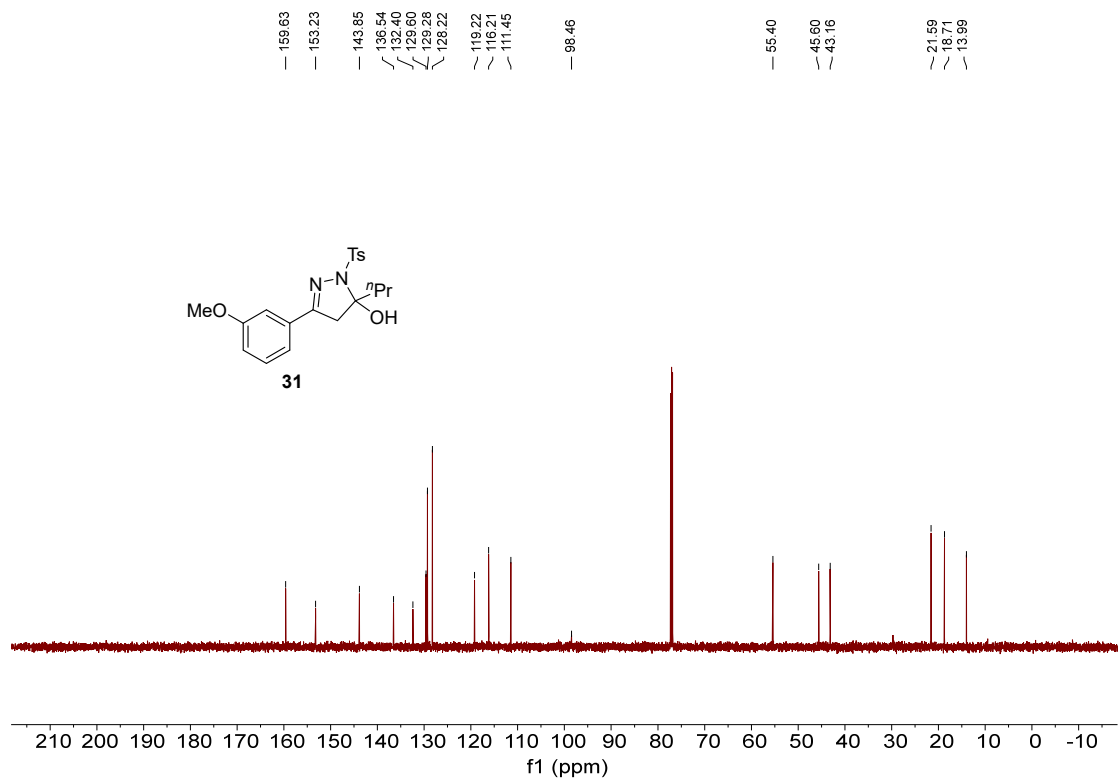

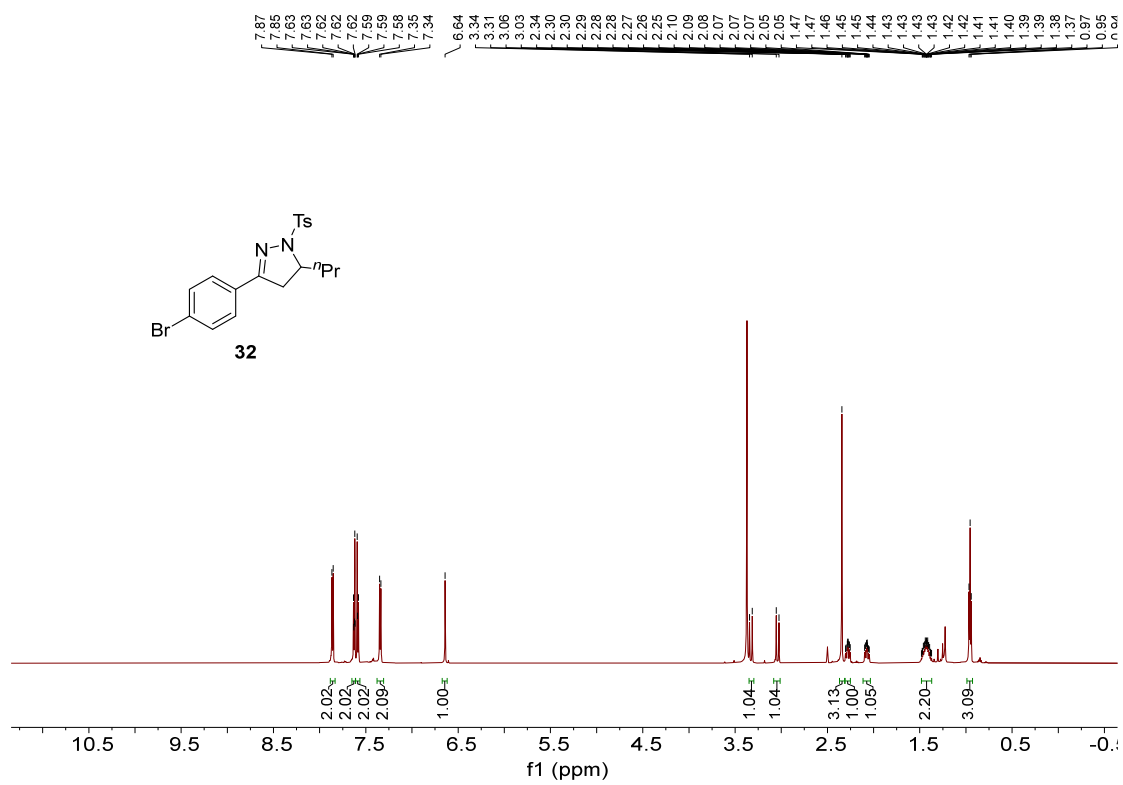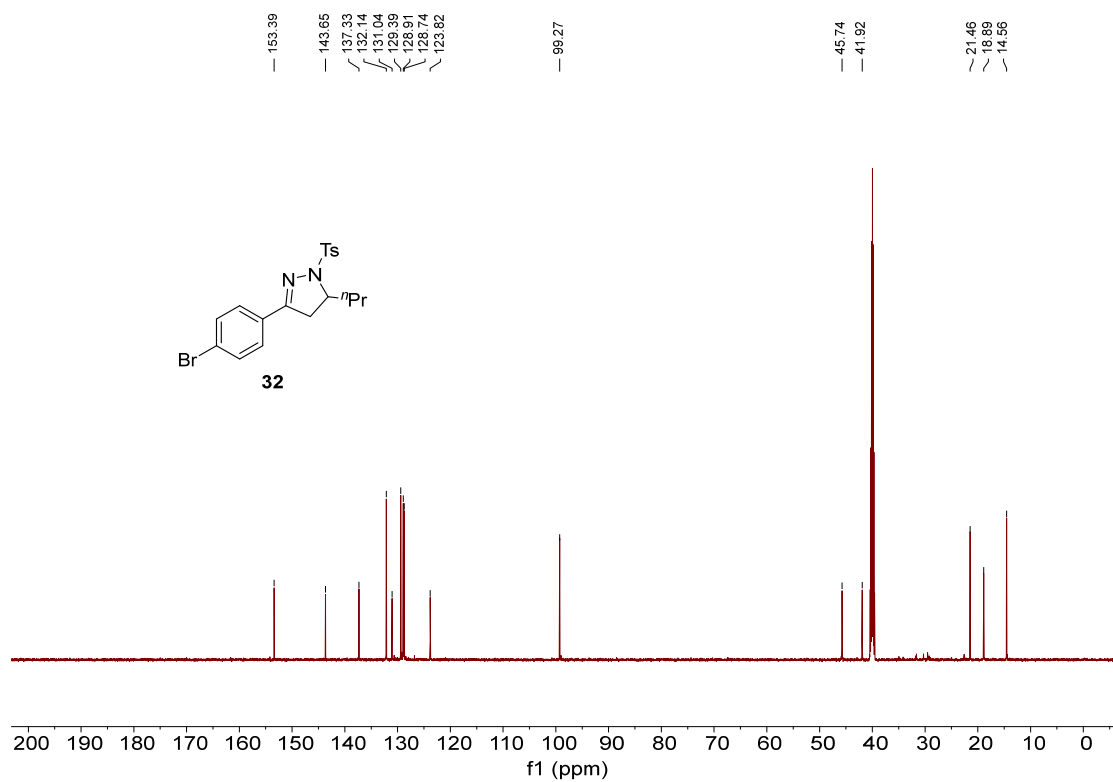



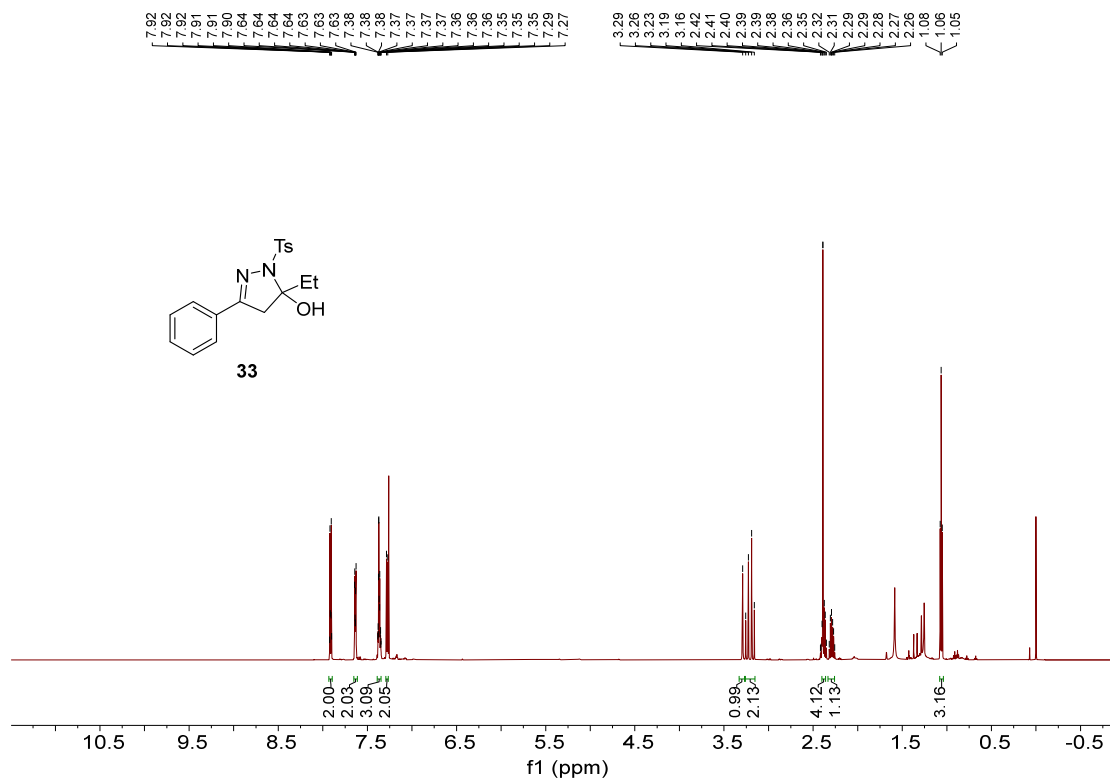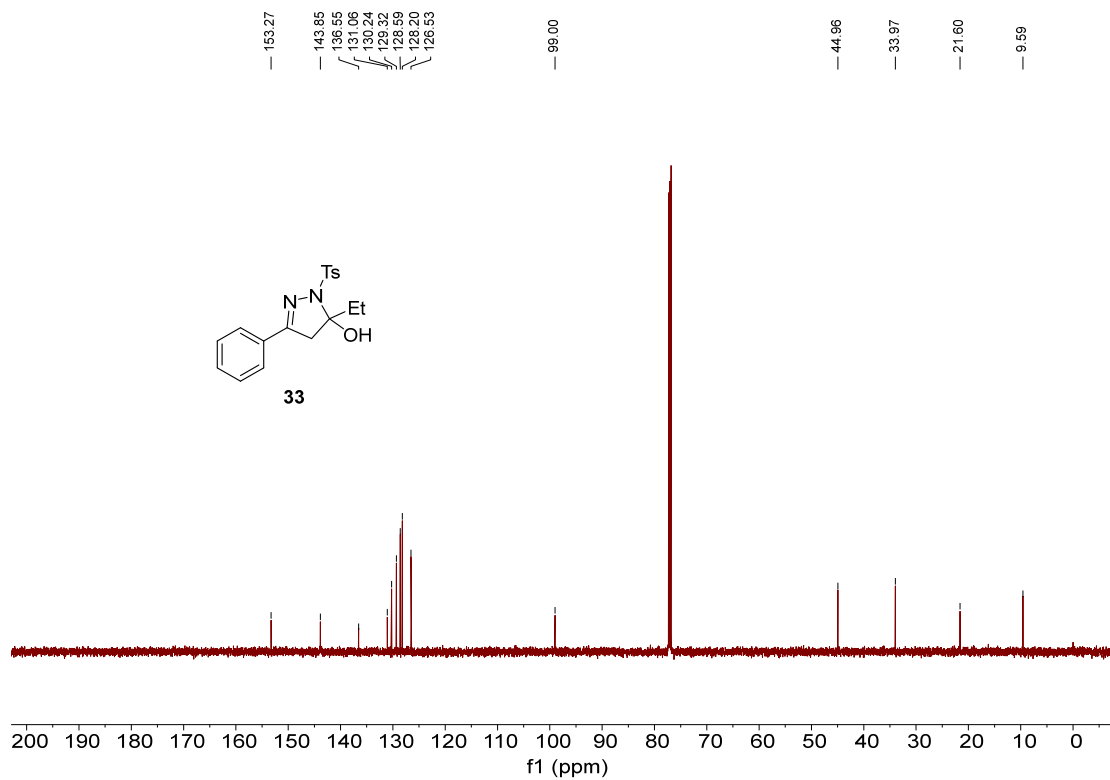

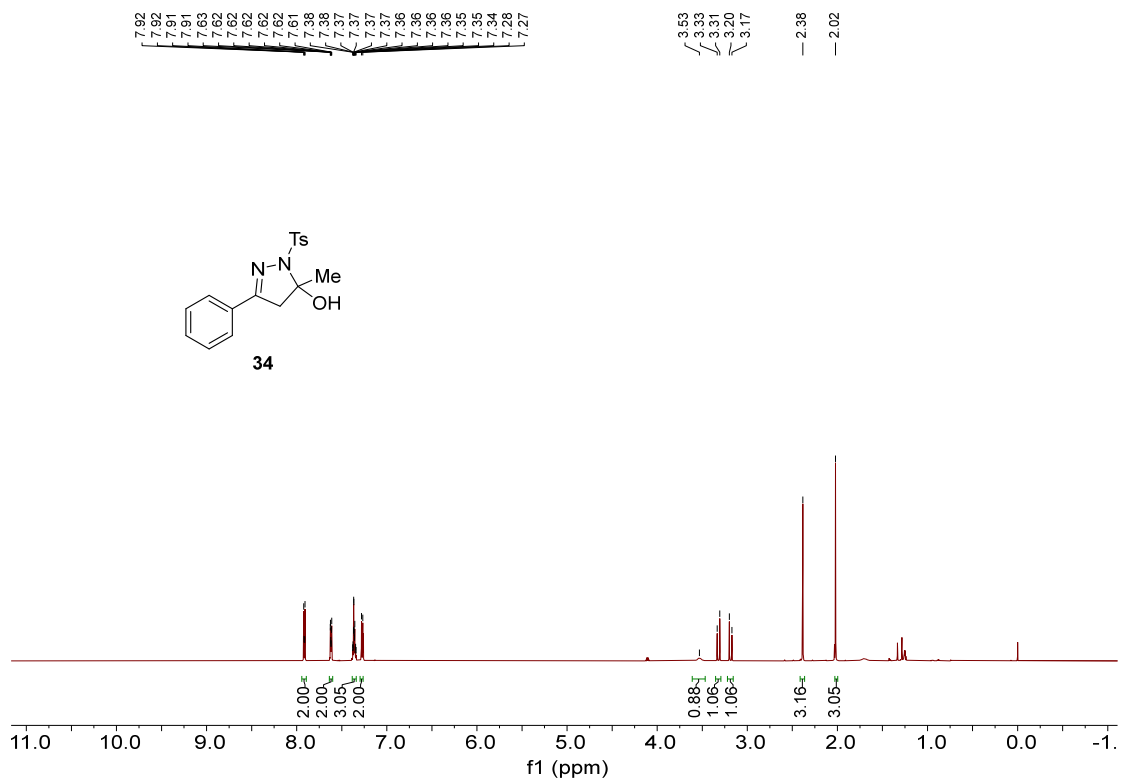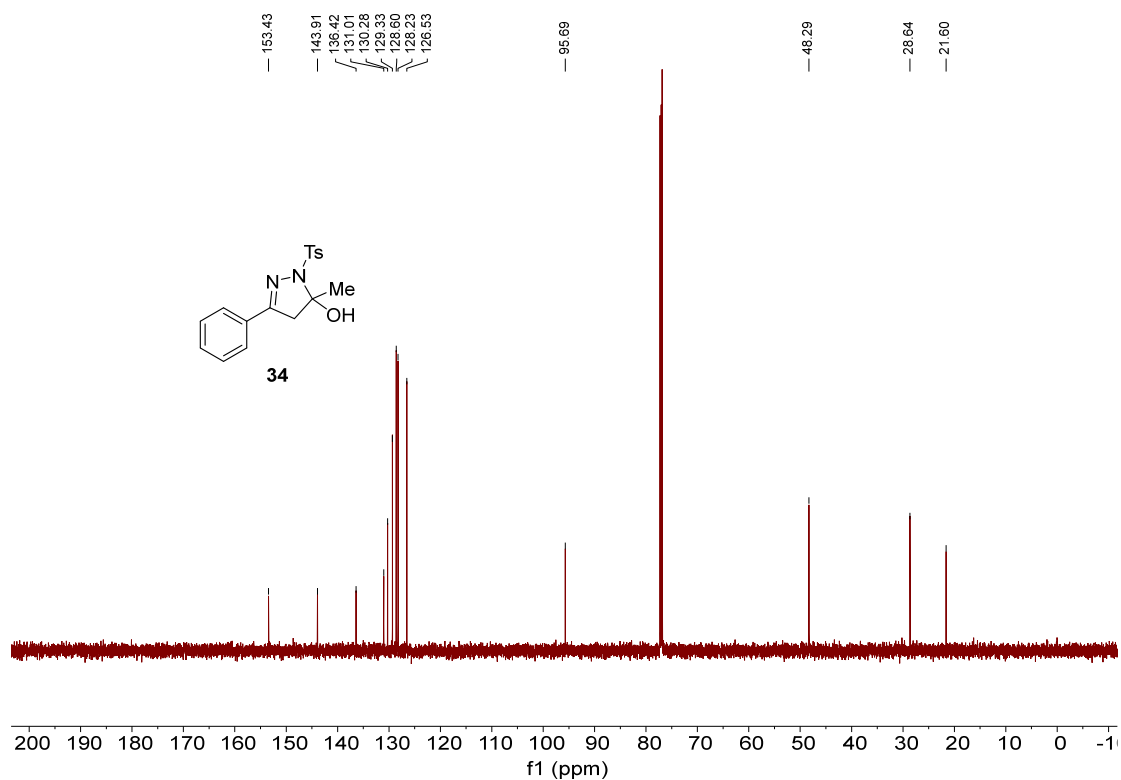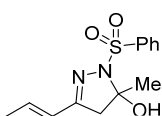



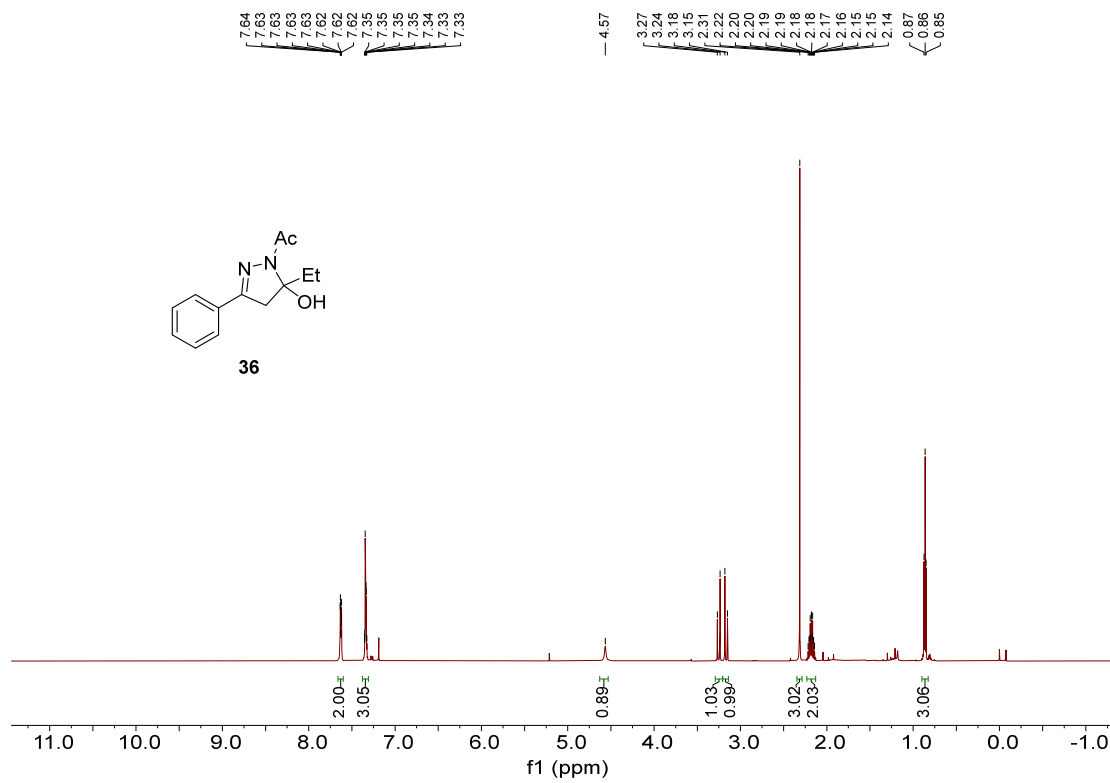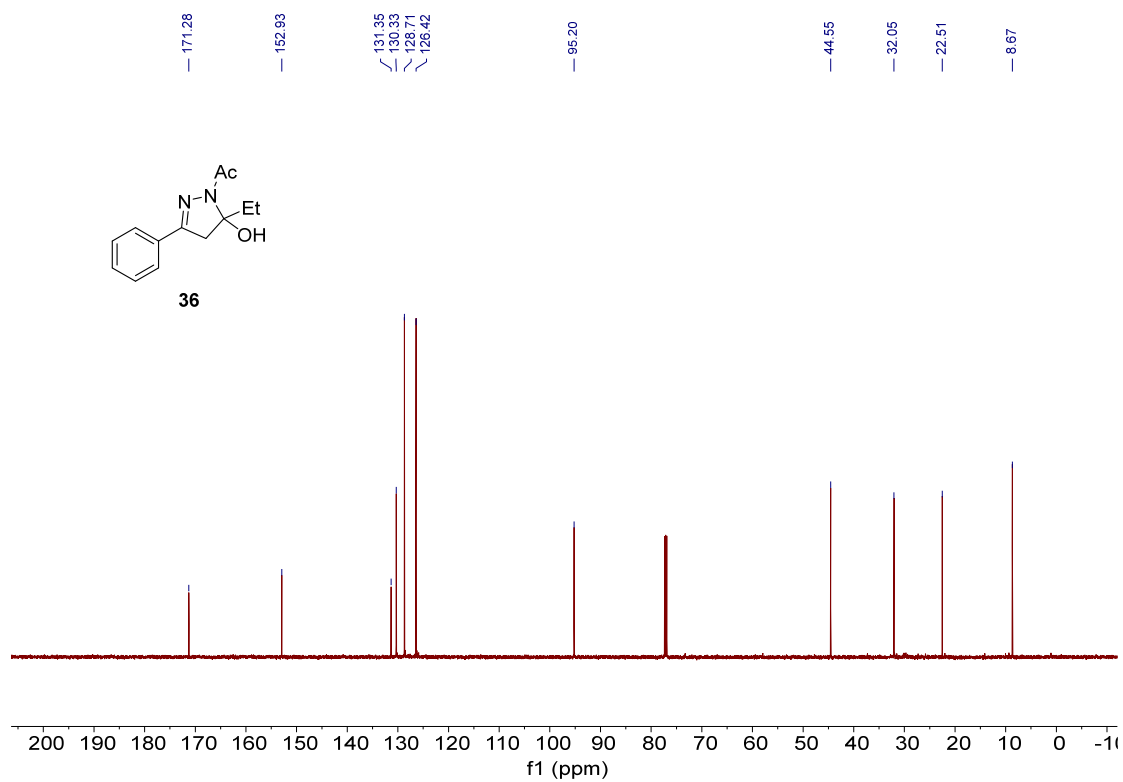

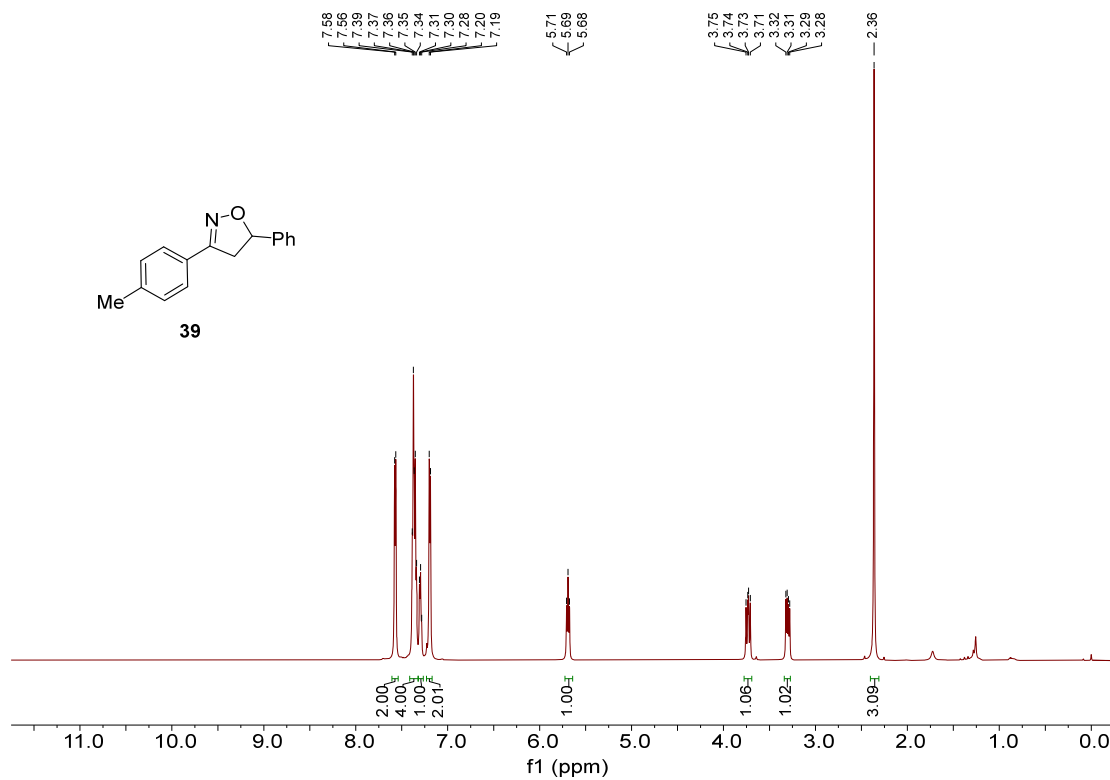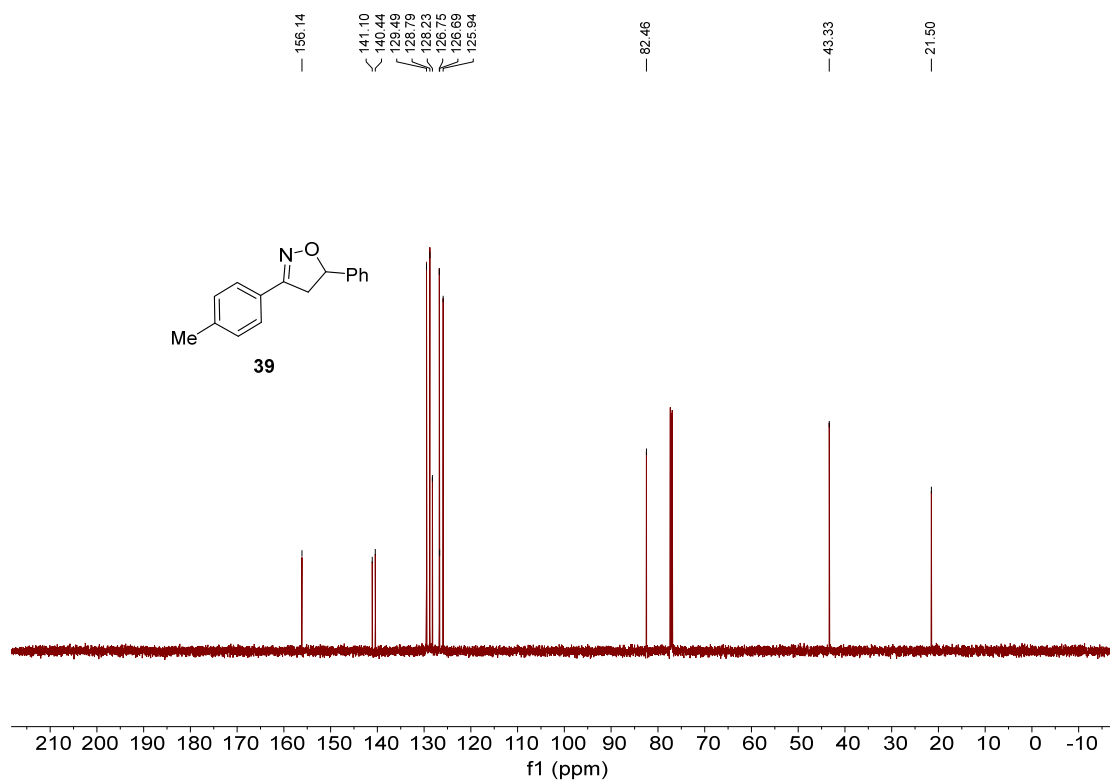

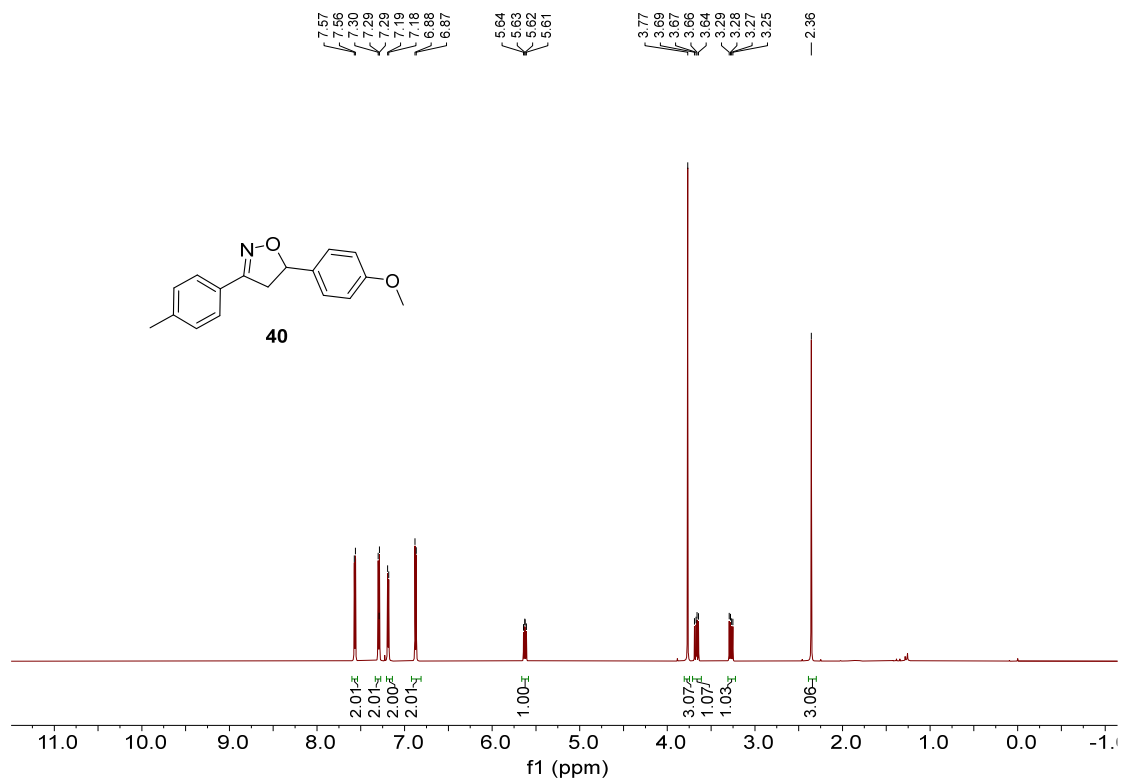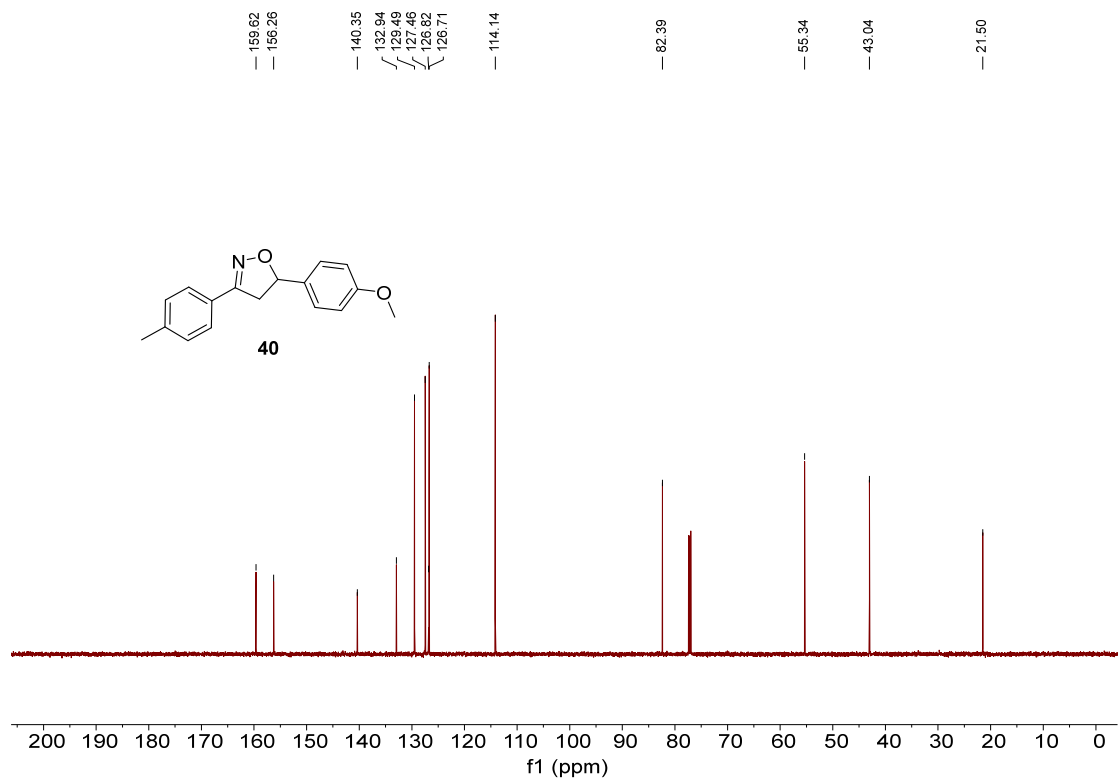

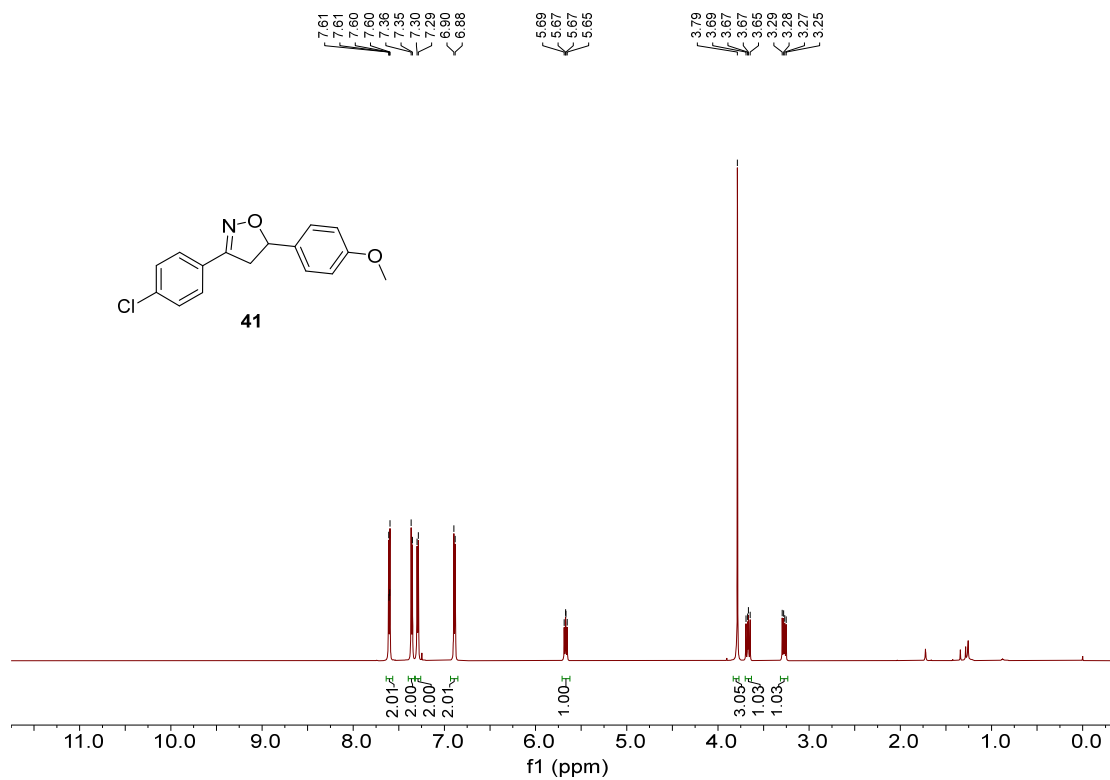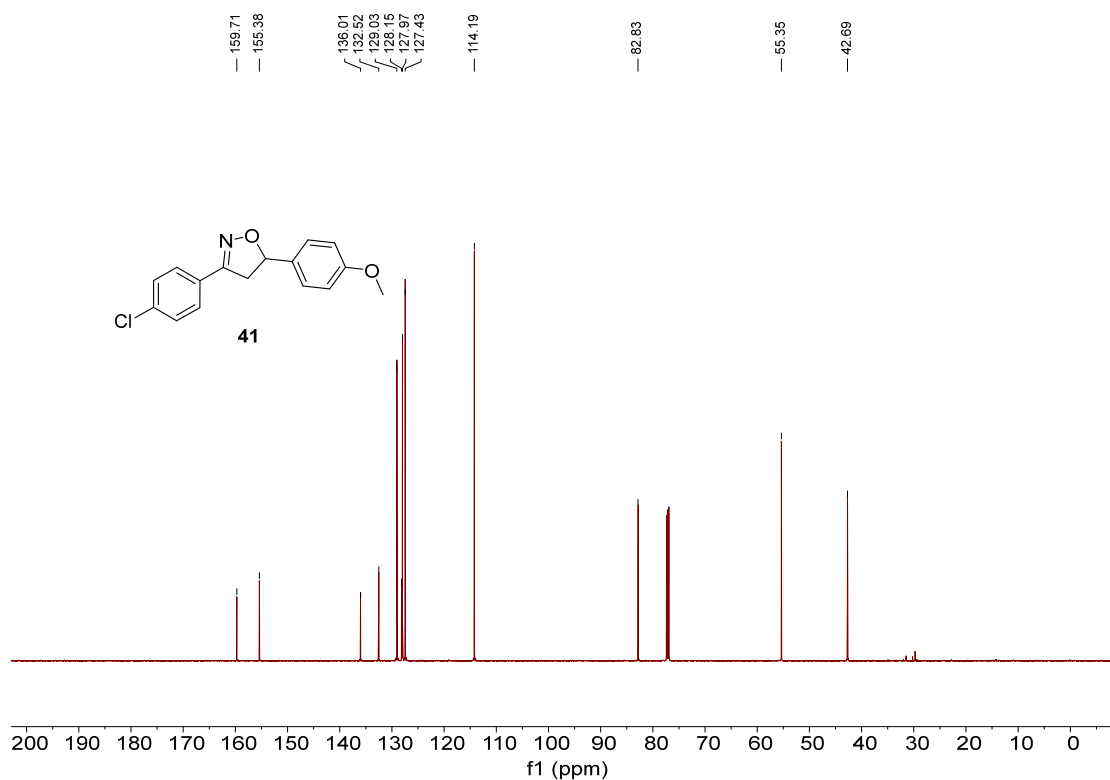

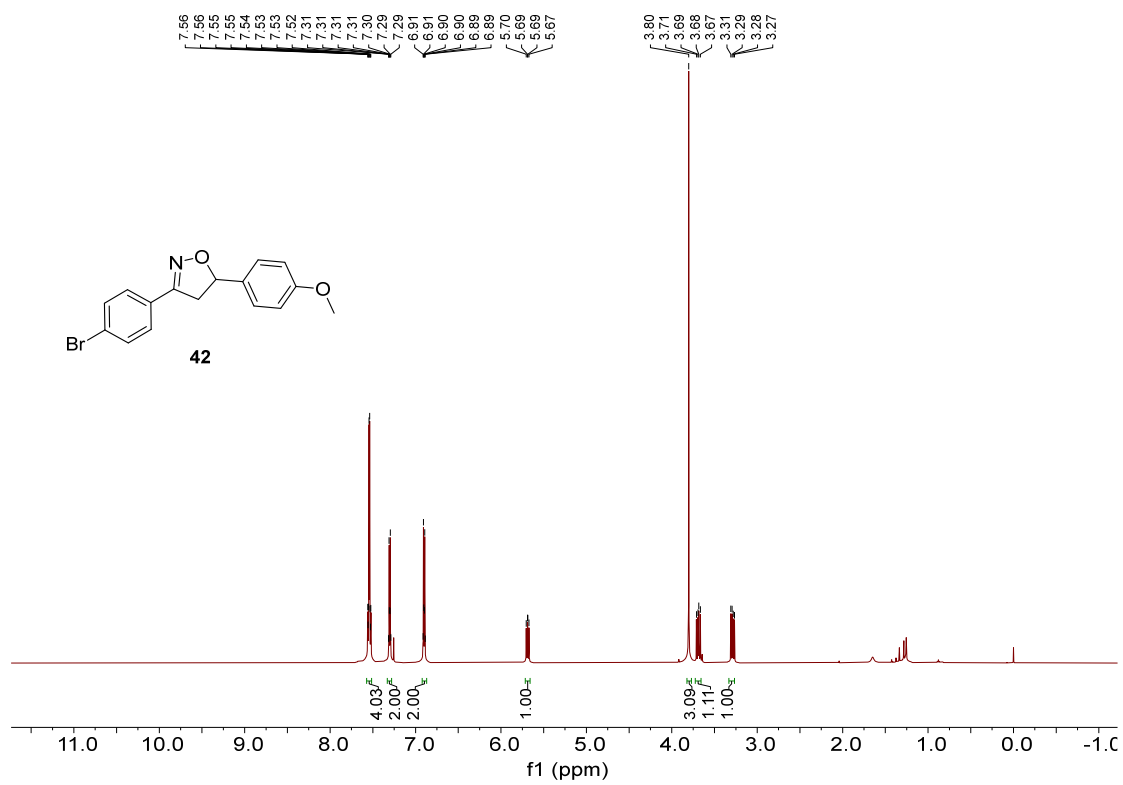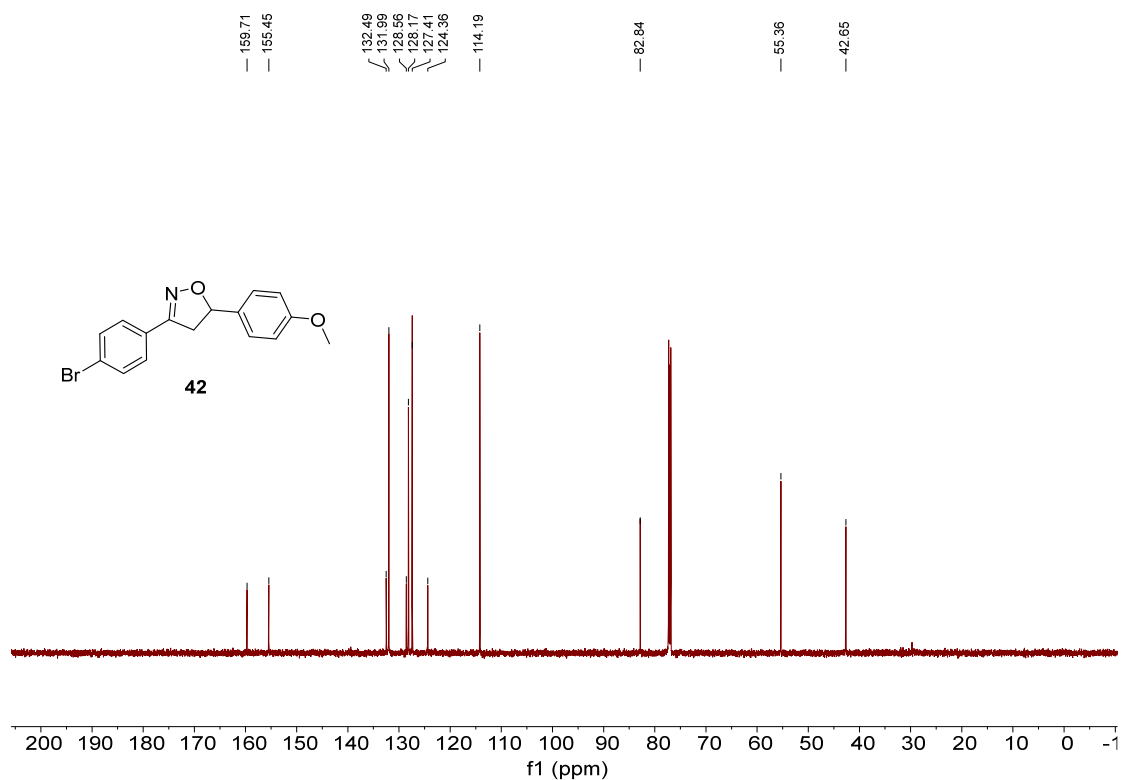



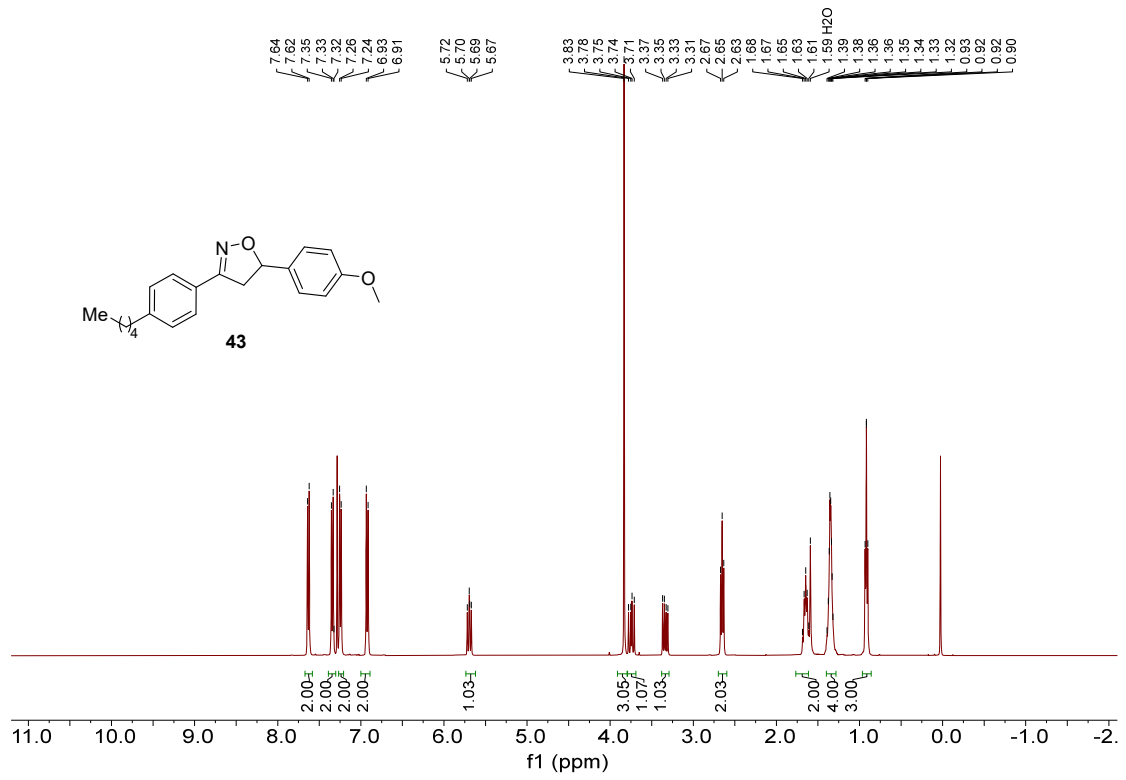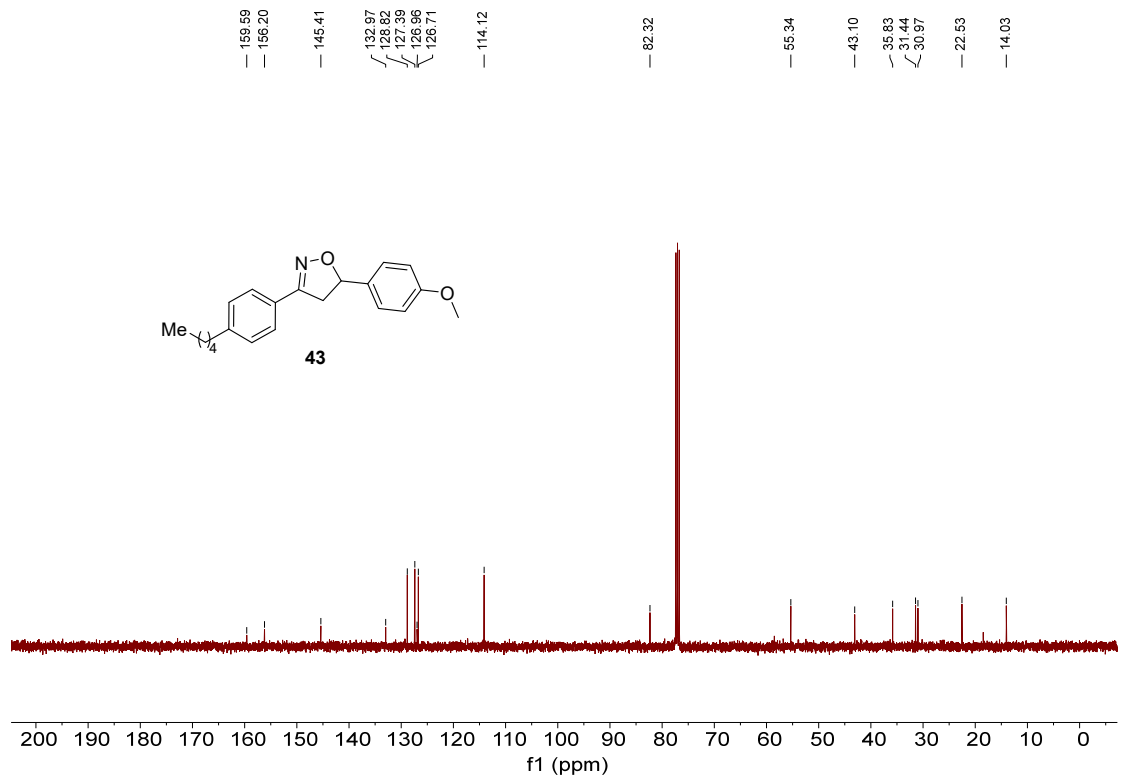

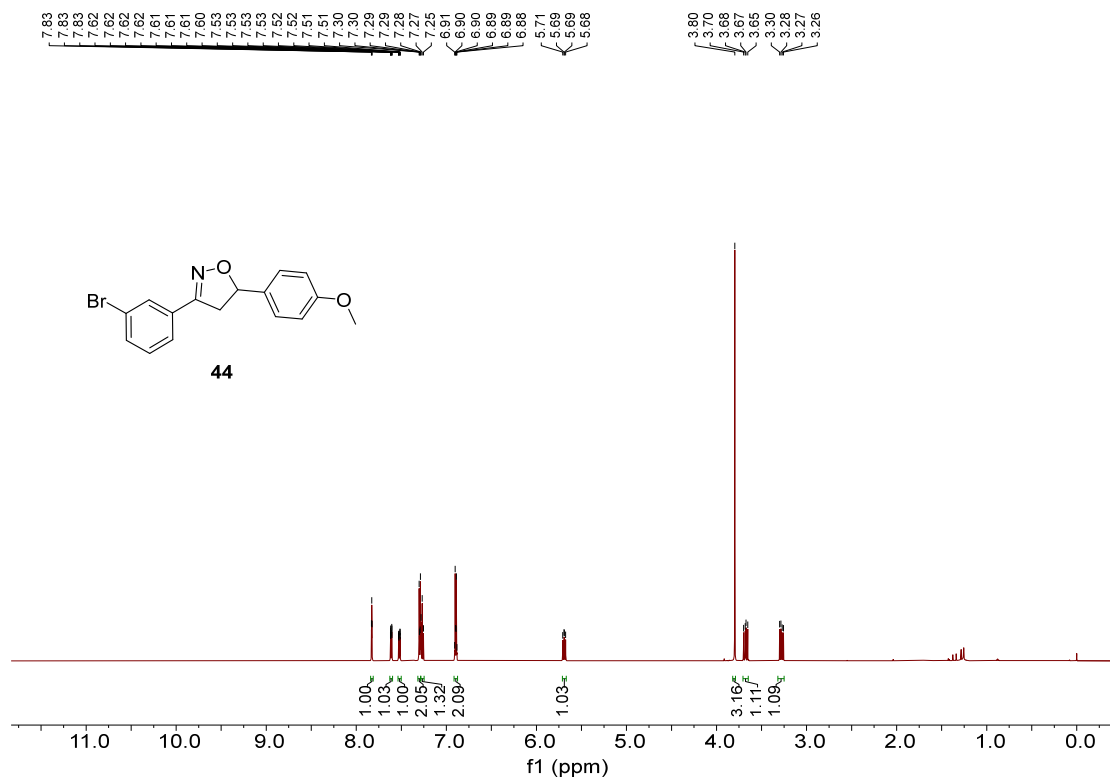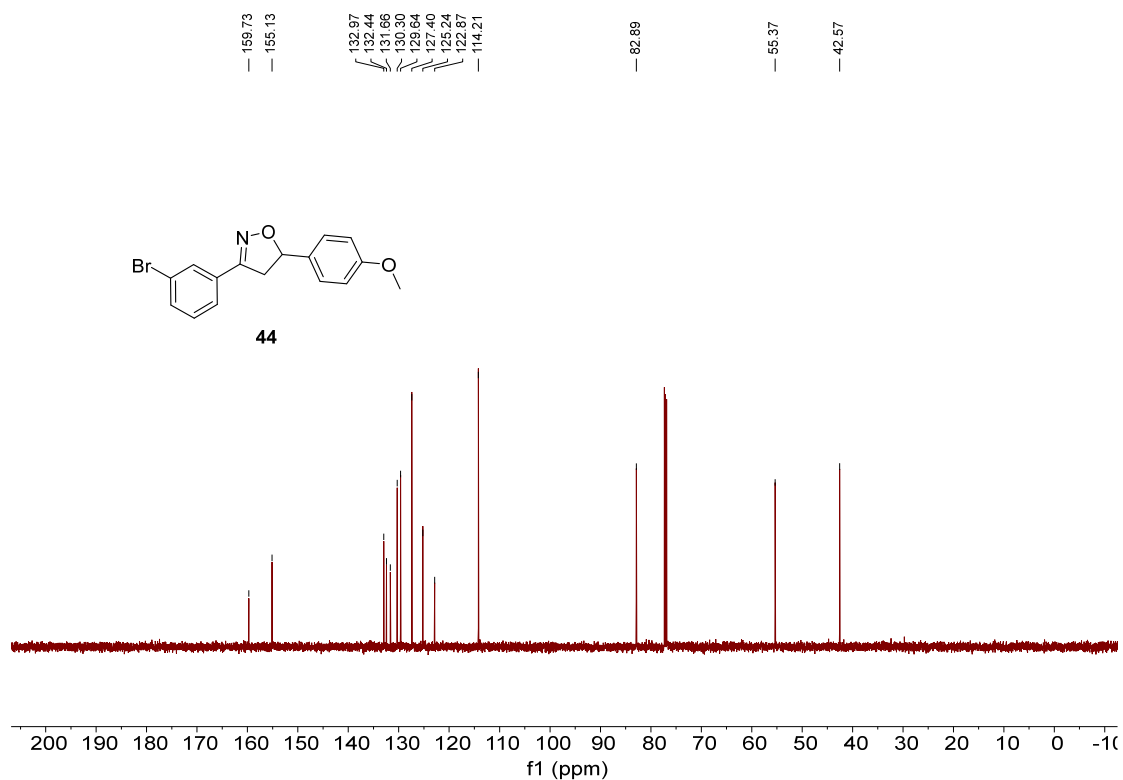

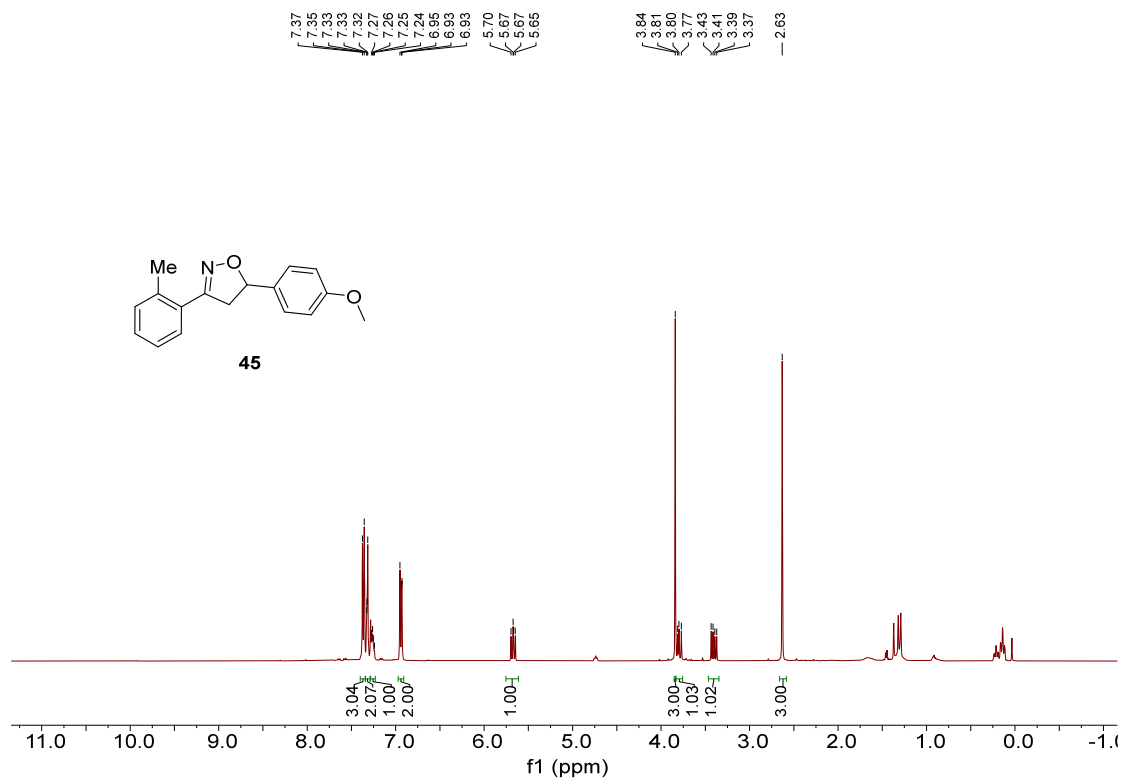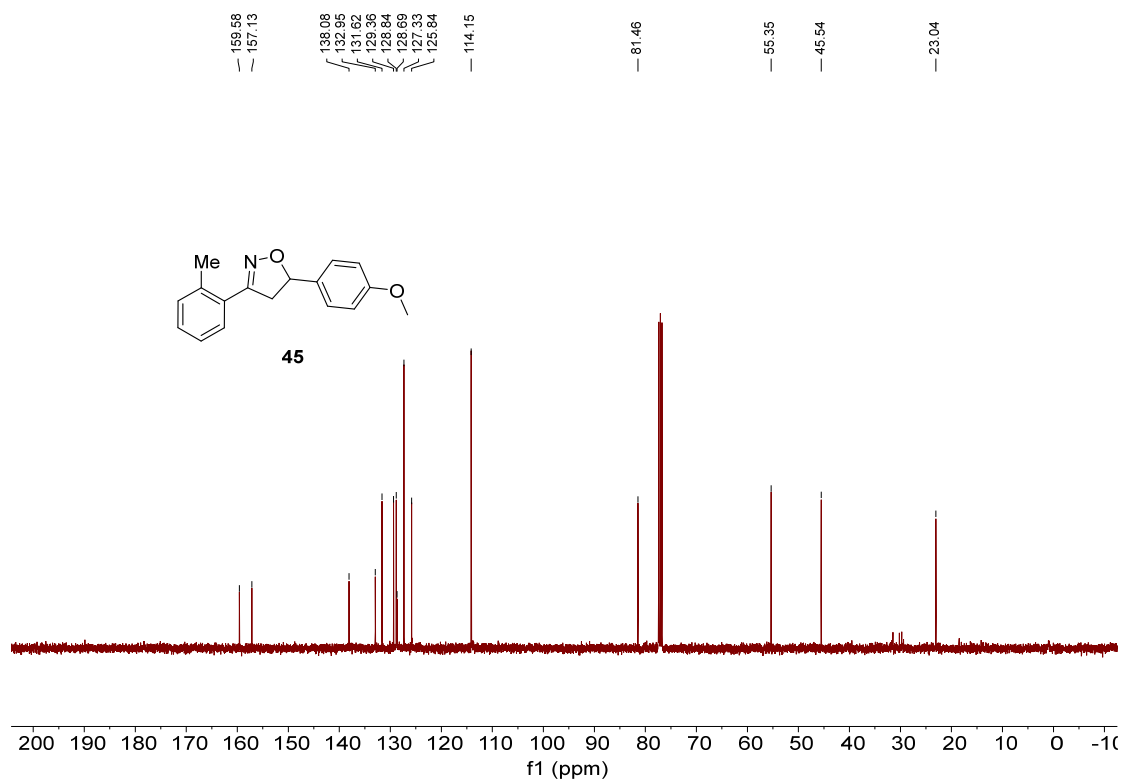

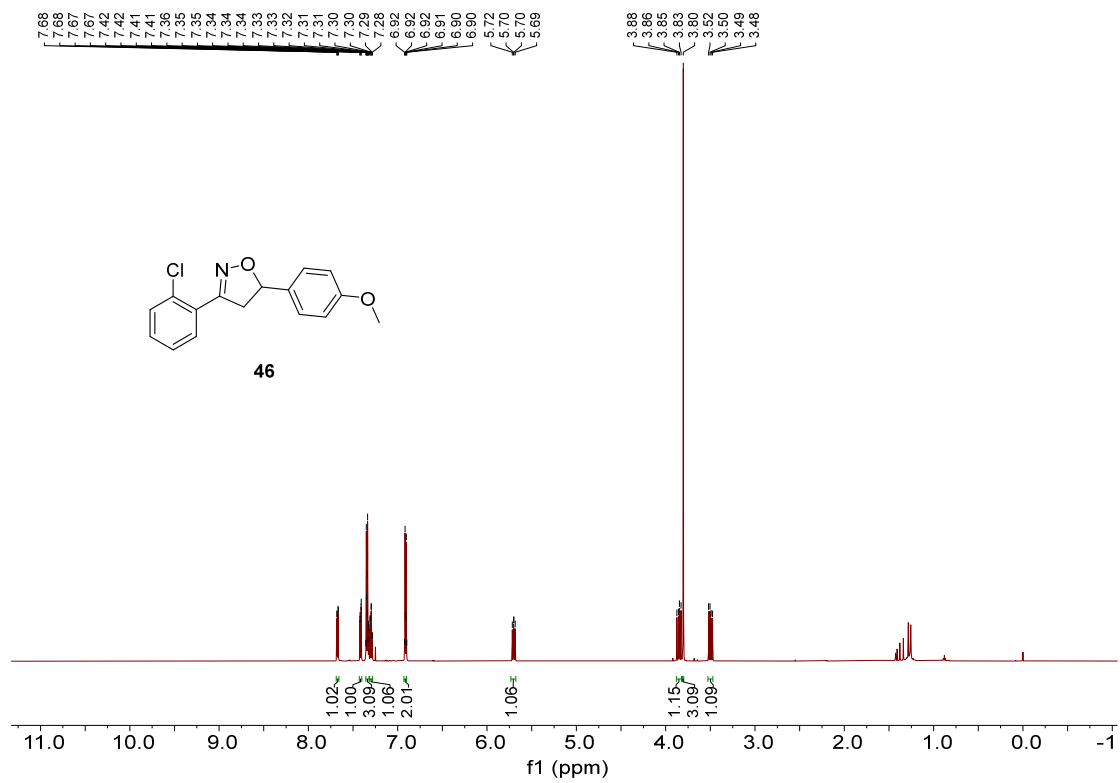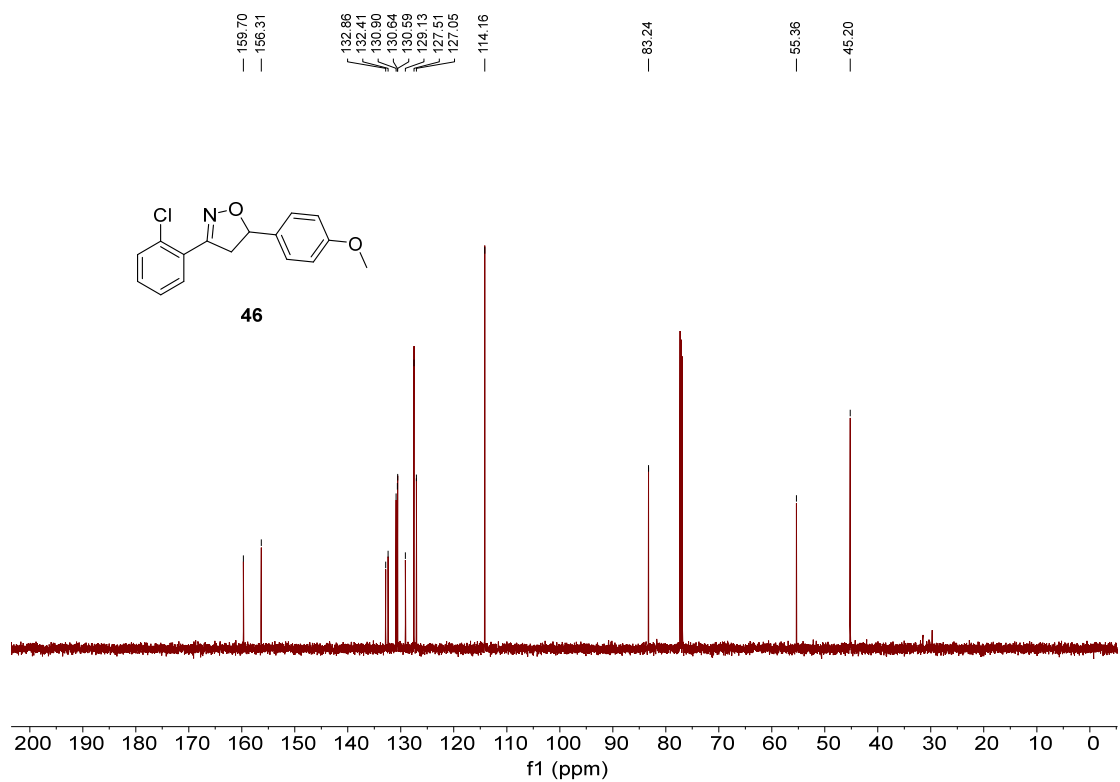

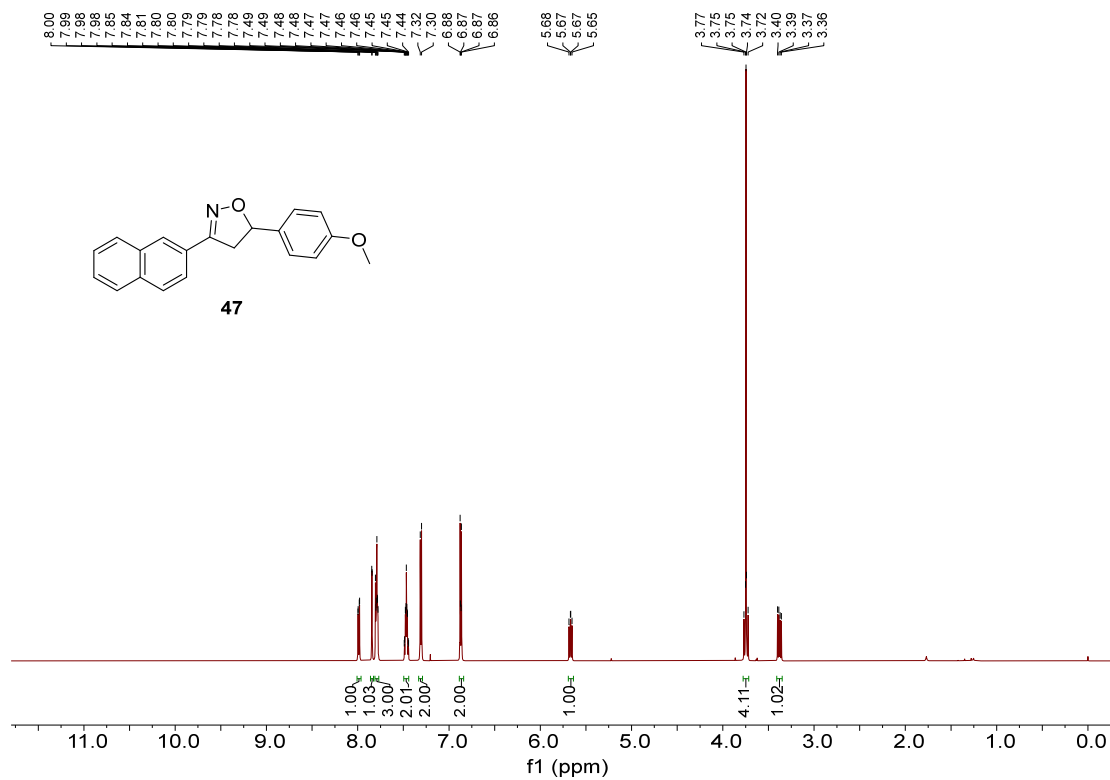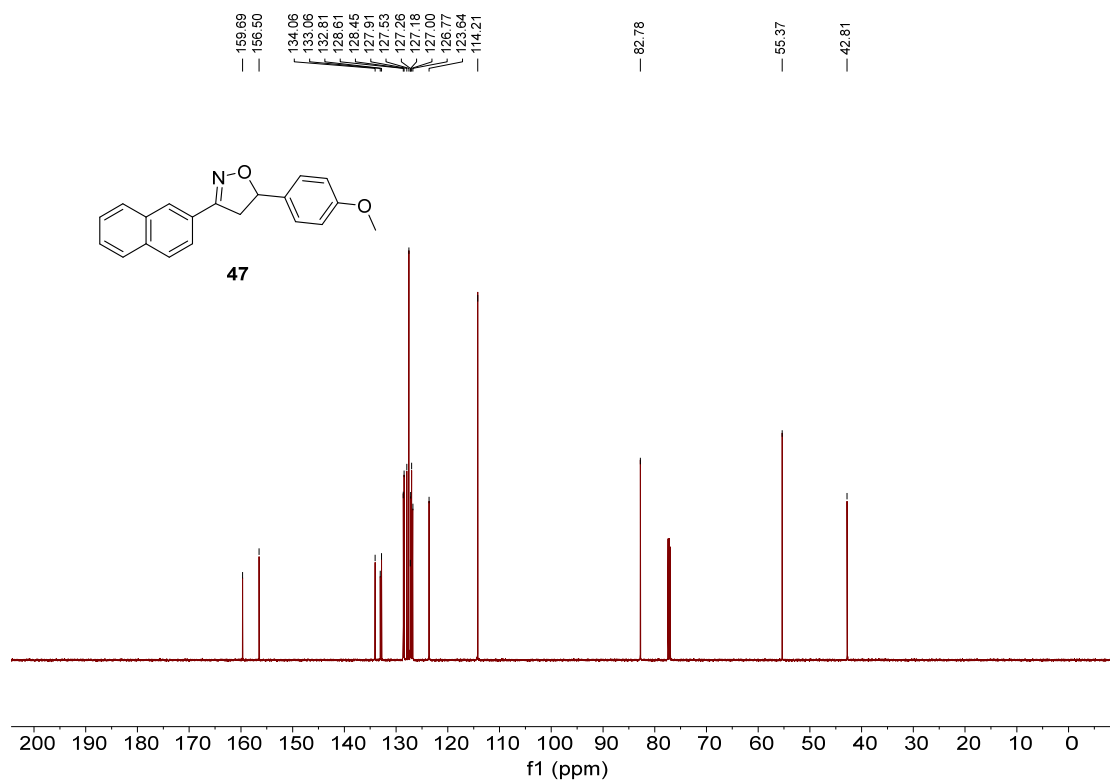

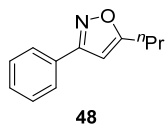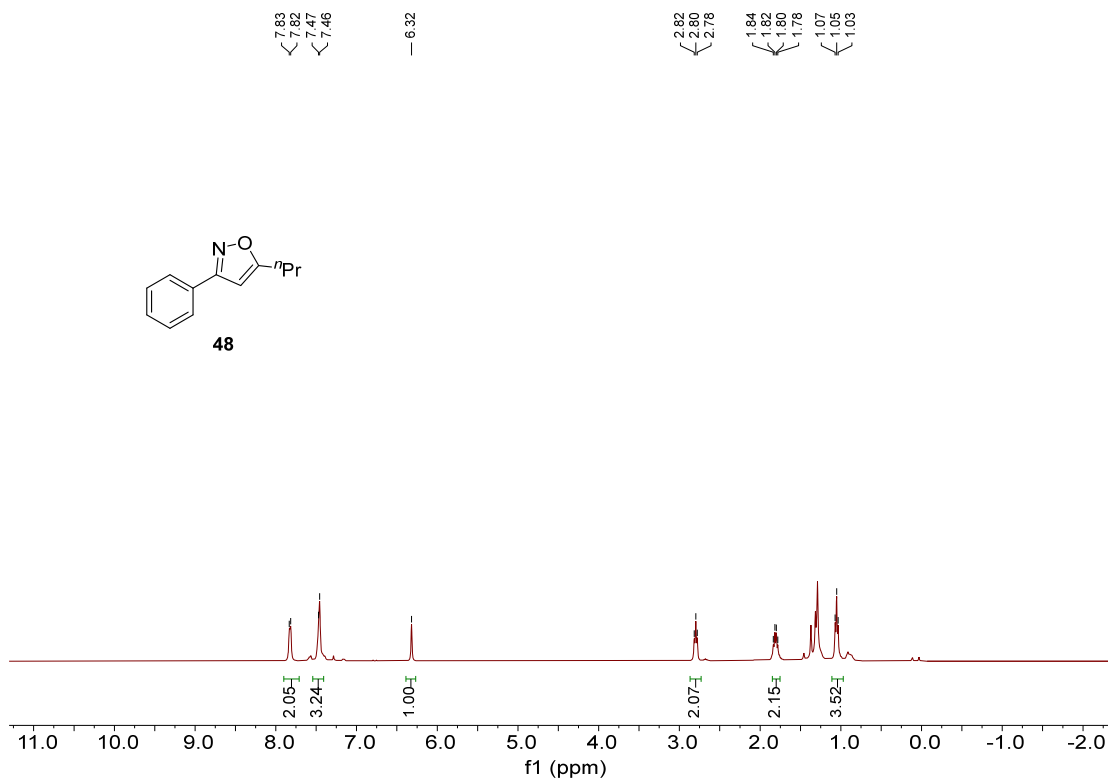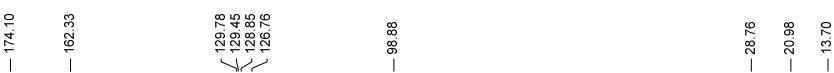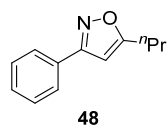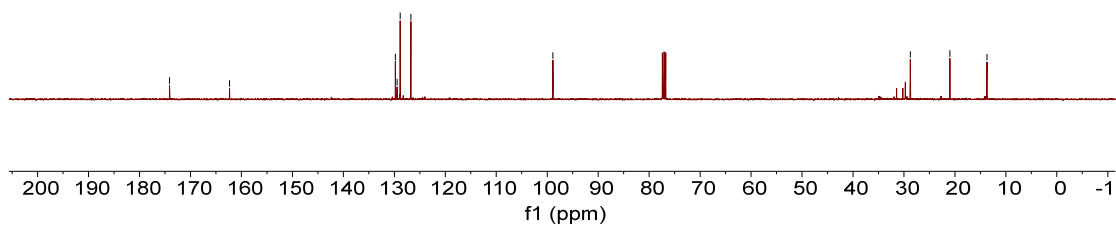

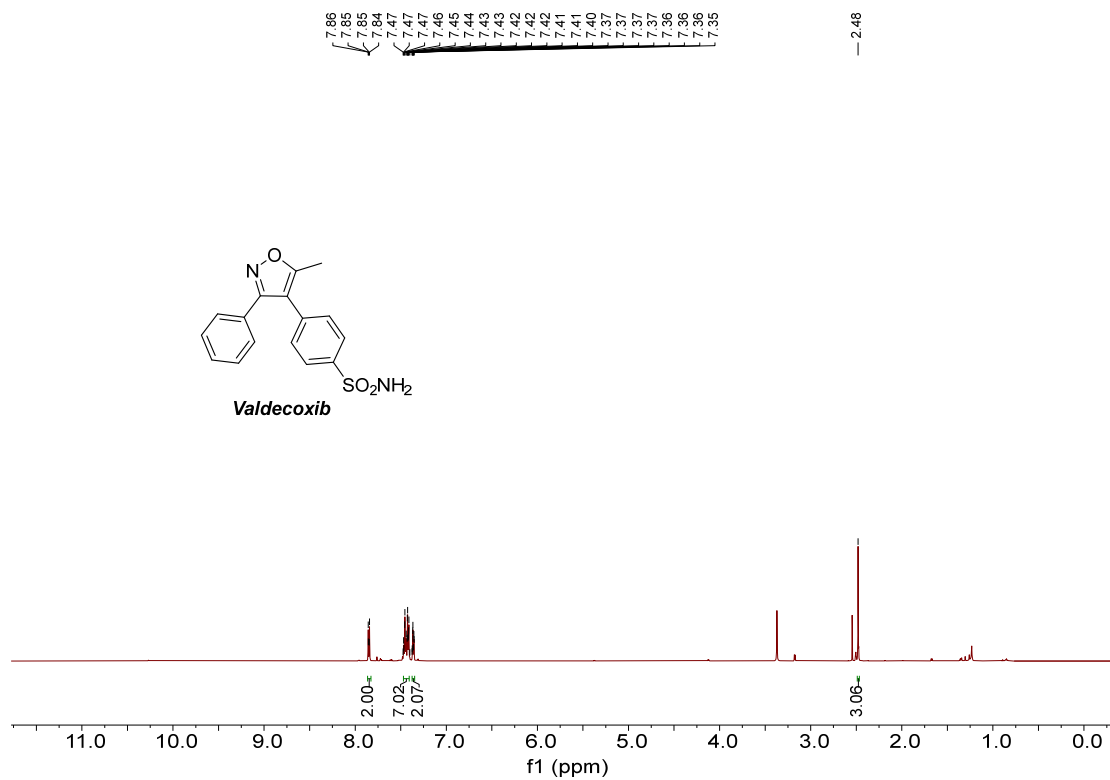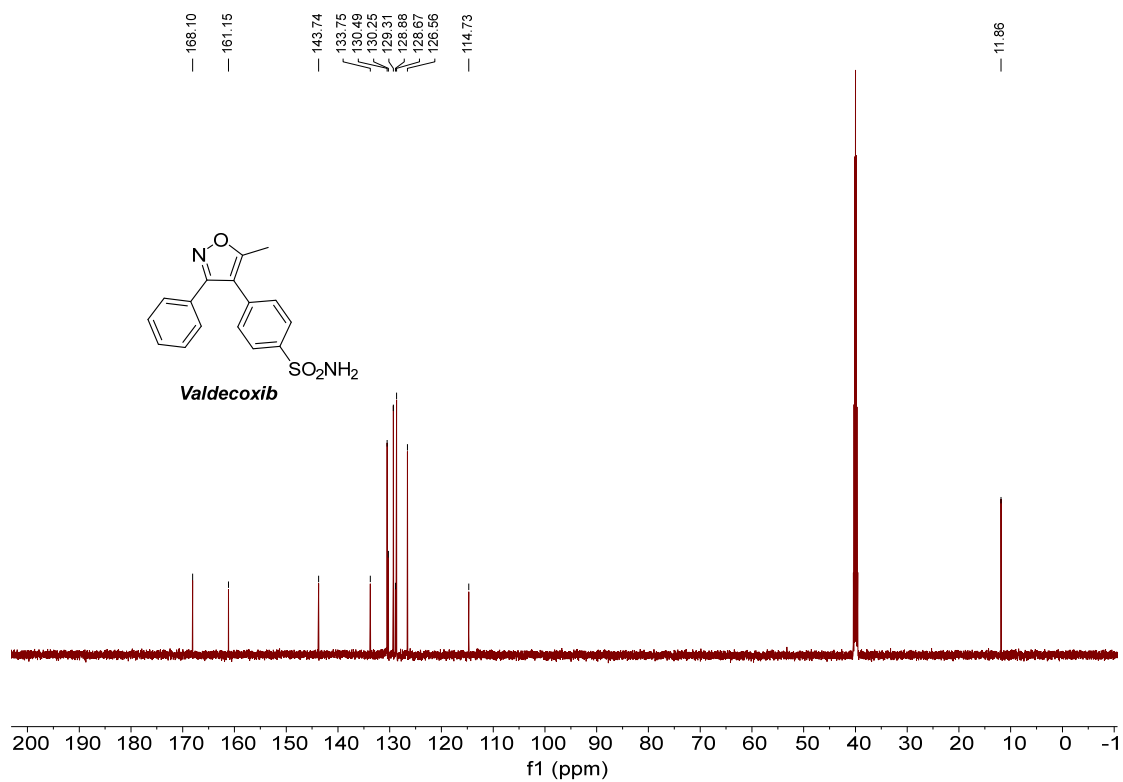

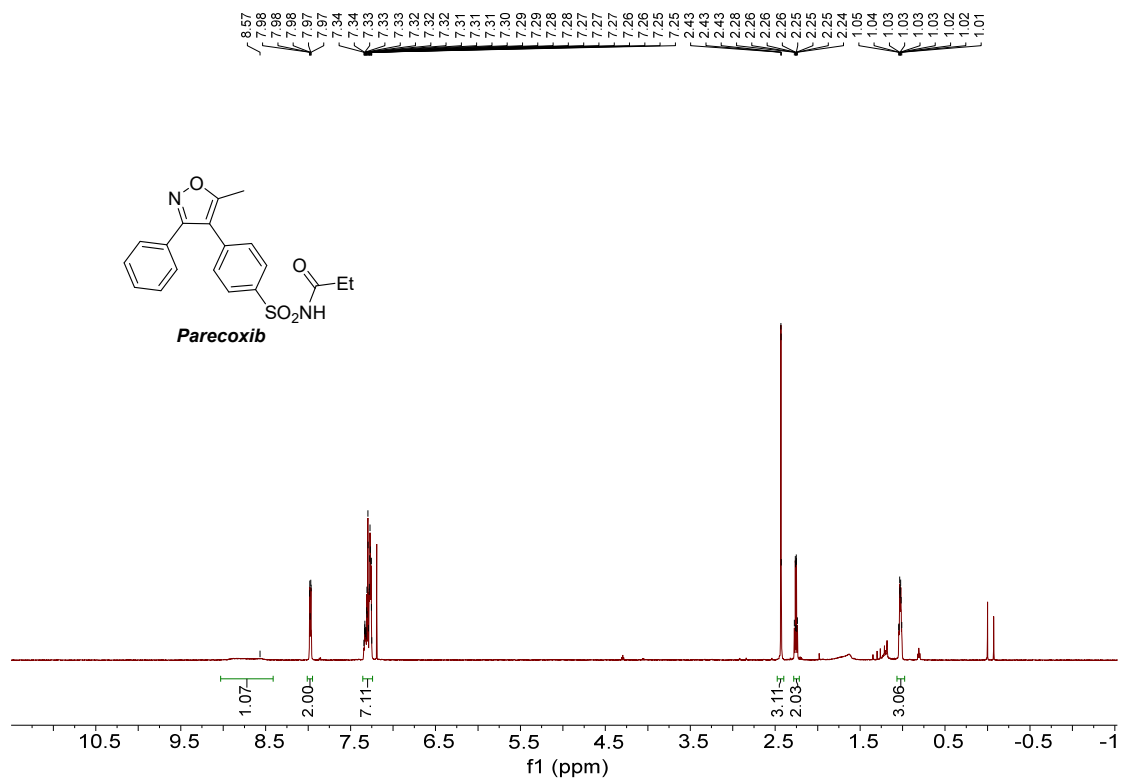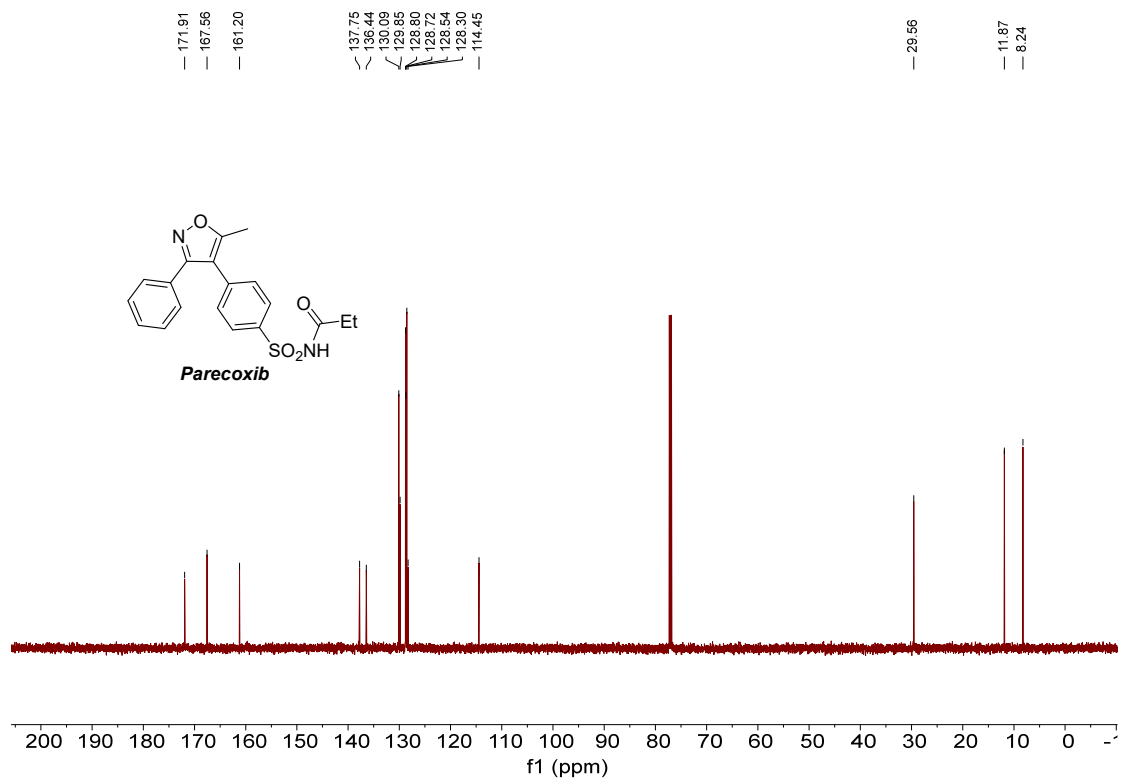



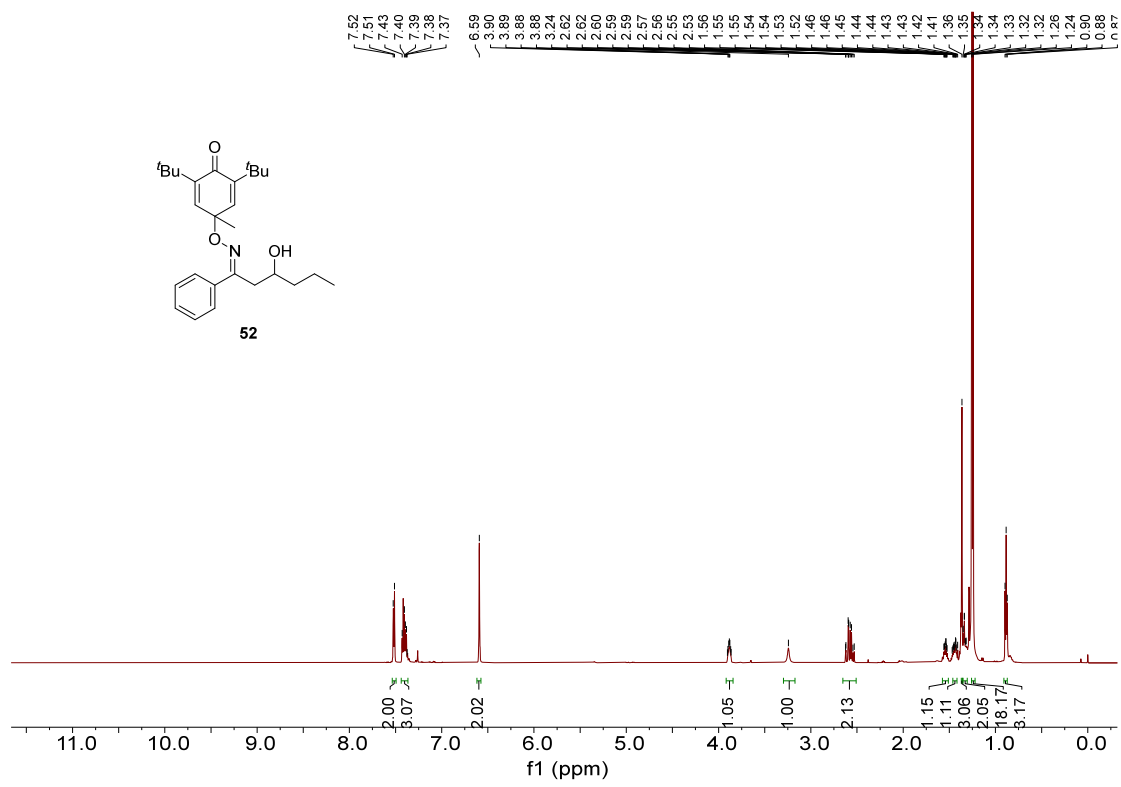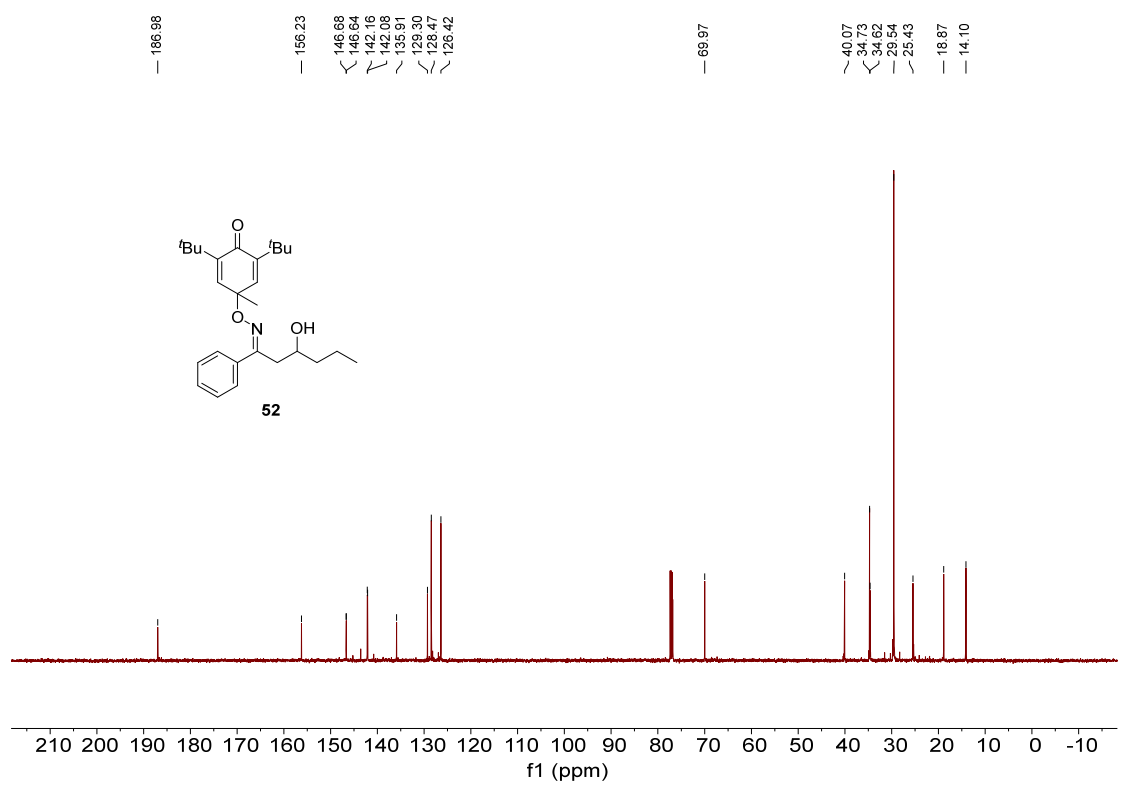

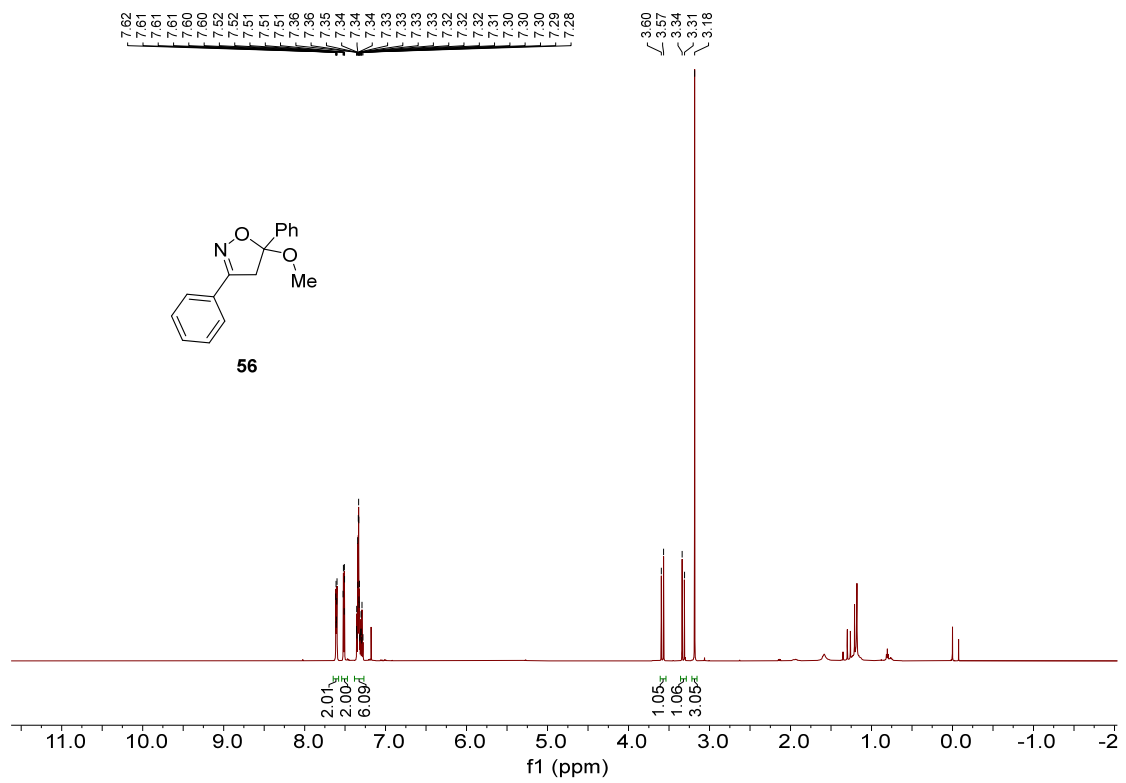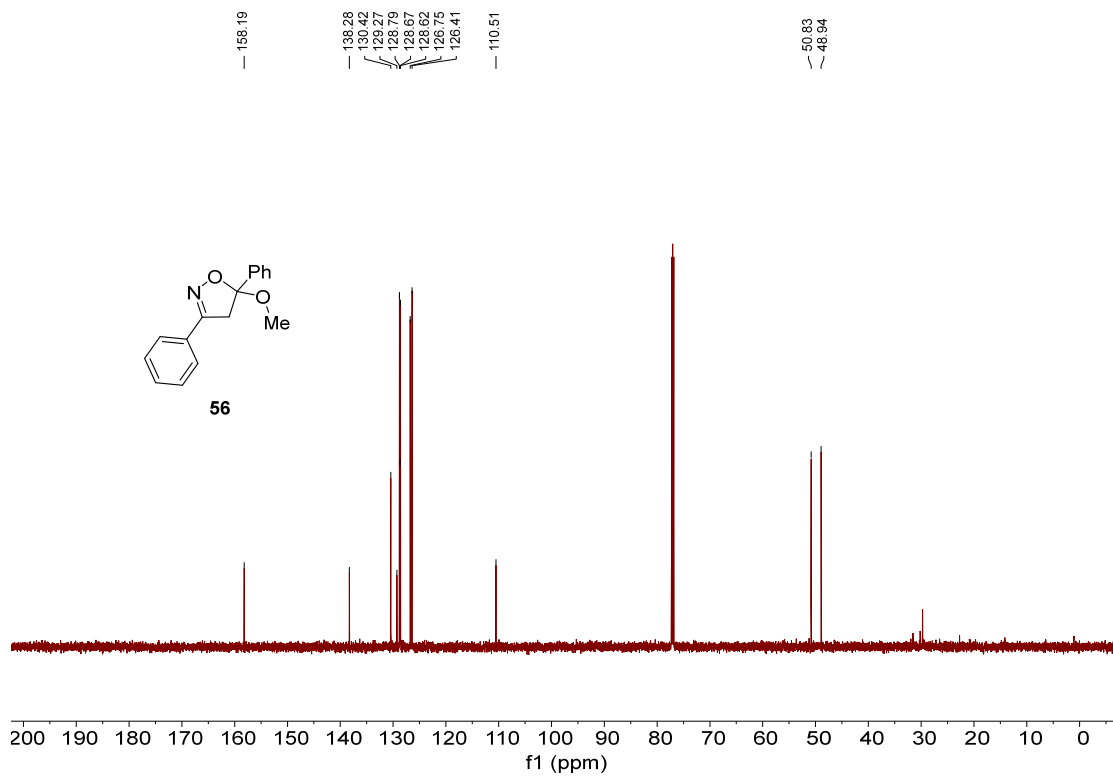

Supplement: d5qo00135h1.pdf [file d5qo00135h1.pdf]
